# Supplementary material for: A neutral germanium-centred hard and soft lewis superacid and its unique reactivity towards hydrosilanes
Source: Royal Society of Chemistry journal article supplement (doi:10.1039/d3dt03626j), 2023-11-15
Supplement: d3dt03626j1.pdf [file d3dt03626j1.pdf]

## Supporting Information

### Table of Contents

|       |                                                                                                           |    |
|-------|-----------------------------------------------------------------------------------------------------------|----|
| 1     | Experimental Section.....                                                                                 | 3  |
| 1.1   | General methods and Instrumentation.....                                                                  | 3  |
| 1.2   | Synthesis and Characterization.....                                                                       | 5  |
| 1.2.1 | Synthesis and characterization of 1·MeCN.....                                                             | 5  |
| 1.2.2 | Synthesis and characterization of acetonitrile-free germane 1 .....                                       | 6  |
| 1.2.3 | Synthesis and characterization of acetonitrile-free silane 2.....                                         | 7  |
| 1.2.4 | Synthesis of and characterization of [K·(18-c-6)][1-F] .....                                              | 8  |
| 1.2.5 | Synthesis of and characterization of [MeCN·SiEt <sub>3</sub> ][H-1].....                                  | 8  |
| 1.2.6 | Synthesis of and characterization of dioxane-bridged germylene 3 .....                                    | 9  |
| 2     | NMR experiments with 1·MeCN .....                                                                         | 10 |
| 2.1   | Lewis acidity determination by <i>Gutmann-Beckett</i> method .....                                        | 10 |
| 2.2   | NMR-Scale Abstraction Experiments .....                                                                   | 12 |
| 2.2.1 | Reaction of 1·MeCN with AgSbF <sub>6</sub> .....                                                          | 12 |
| 2.2.2 | Reaction of 1·MeCN with [Mes <sub>3</sub> PH][HB(C <sub>6</sub> F <sub>5</sub> ) <sub>3</sub> ] .....     | 13 |
| 2.2.3 | Reaction of 1·MeCN with Et <sub>3</sub> SiF .....                                                         | 15 |
| 2.2.4 | Reaction of acetonitrile-free 1 with Et <sub>3</sub> SiH .....                                            | 16 |
| 2.2.5 | Reaction of 1 with Et <sub>3</sub> SiH in presence of acetonitrile .....                                  | 19 |
| 2.3   | Catalytic experiments .....                                                                               | 23 |
| 2.3.1 | Dimerization of α-methylstyrene and 1,1-diphenylethylene.....                                             | 23 |
| 2.3.2 | Hydrosilylation of α-methylstyrene .....                                                                  | 26 |
| 2.3.3 | Stoichiometric hydrosilylation of methylstyrene with Et <sub>3</sub> SiH.....                             | 28 |
| 2.3.4 | Hydrosilylation of α-methylstyrene with mixed silanes (iPr <sub>3</sub> SiH vs Et <sub>3</sub> SiH) ..... | 30 |
| 2.3.5 | Hydrosilylation of α-methylstyrene with isotopically marked Et <sub>3</sub> SiD .....                     | 32 |
| 3     | Computational Section .....                                                                               | 37 |
| 3.1   | General Information .....                                                                                 | 37 |
| 3.2   | Hydrosilane activation mechanism.....                                                                     | 37 |

|     |                                                                      |    |
|-----|----------------------------------------------------------------------|----|
| 3.3 | Thermochemistry analysis of the hydrosilylation catalytic cycle..... | 39 |
| 3.4 | Alternative mechanisms for the catalytic hydrosilylation .....       | 39 |
| 3.5 | Calculated energies for compounds in Figure 3 and Scheme 2B.....     | 41 |
| 3.6 | Calculation of ion affinities .....                                  | 42 |
| 4   | Single-Crystal X-ray Diffraction Analysis.....                       | 43 |
| 4.1 | Crystal Structure of 1·MeCN.....                                     | 43 |
| 4.2 | Crystal Structure of [K·(18-c-6)][F-1].....                          | 43 |
| 4.3 | Crystal Structure of donor-free silane 2 .....                       | 44 |
| 4.4 | Crystal Structure of dioxane-coordinated germylene 3 .....           | 44 |
| 4.5 | Preliminary crystal structure of donor-free 1 .....                  | 45 |
| 5   | NMR Spectra.....                                                     | 49 |
| 5.1 | NMR spectra of 1·MeCN .....                                          | 49 |
| 5.2 | NMR spectra of 1 .....                                               | 51 |
| 5.3 | NMR spectra of 2 .....                                               | 53 |
| 5.4 | NMR spectra of [K·18-c-6][1-F] .....                                 | 55 |
| 5.5 | NMR spectra of [Et <sub>3</sub> Si·MeCN][H-1].....                   | 57 |
| 5.6 | NMR spectra of compound mixture 3 and 4 .....                        | 59 |
| 5.7 | NMR spectra of 1,4-dioxane-coordinated germylene 3 .....             | 61 |
| 6   | References .....                                                     | 63 |
| 7   | Appendix A .....                                                     | 64 |

# 1 Experimental Section

## 1.1 General methods and Instrumentation

### Materials

All mentioned reactions were carried out in properly dried borosilicate glassware, filled with argon 4.6 ( $\geq 99.996\%$ ; *Westfalen AG*) or in *LABstar* gloveboxes from *MBraun Inertgas-Systeme GmbH* with  $\text{H}_2\text{O}$  and  $\text{O}_2$  levels not exceeding 5 ppm. In each reaction small overpressure of argon atmosphere was used to additionally prevent the intrusion of air. For sealing glass apparatuses *Triboflon III* PTFE/PEPE grease from *Freudenberg & Co. KG* was used. All heat-sensitive plastic materials such as syringes or cannulas were stored originally packed and flushed three times with argon.

### Chemicals

The Chemicals for this project were purchased from the commercial distributors: *Merck KGaA (Sigma-Aldrich)*, *ABCR GmbH and TCI Co. Ltd.* The used hexafluoropinacol ( $\text{H}_2\text{pin}^F$ ) was purchased from *Sigma-Aldrich* and *ABCR GmbH* and dried with molecular sieves (4 Å) in diluted  $\text{Et}_2\text{O}$  solution. After filtration and solvent removal in fine vacuo a mixture of 80 – 88 w%  $\text{H}_2\text{pin}^F$  in  $\text{Et}_2\text{O}$  was obtained.  $\text{Li}_2\text{pin}^F$ ,<sup>[1]</sup>  $[\text{Mes}_3\text{PH}][\text{HB}(\text{C}_6\text{F}_5)_3]$ <sup>[2]</sup> and  $\text{B}(\text{C}_6\text{F}_5)_3$ <sup>[3]</sup> were synthesized according to literature procedures. Safety note: The use of directly dried,  $\text{Et}_2\text{O}$ -free  $\text{H}_2\text{pin}^F$  in one lithiation experiment resulted in an explosion in the glovebox when the product was scraped from the glass wall with a spatula. Reactants for catalytic experiments were degassed and stored over molecular sieves. The used solvents for applications were distilled over elemental sodium/benzophenone (toluene, *n*-hexane,  $\text{Et}_2\text{O}$ ), calcium hydride (acetonitrile, chloroform, acetonitrile- $d_3$ , chloroform- $d$  and dichloromethane- $d_2$ ), additionally degassed and stored over molecular sieves.

### NMR-spectroscopy

All NMR samples were prepared in an argon (4.6) atmosphere using *J-Young* PTFE valve NMR tubes. The recorded  $^1\text{H}$ ,  $^{13}\text{C}$ ,  $^{19}\text{F}$  and  $^{29}\text{Si}$  NMR spectra were obtained from a *Bruker Avance Neo* 400 MHz spectrometer and a *Bruker AV500C* spectrometer at ambient temperatures (300 K), unless otherwise stated. The VT-NMR experiments were carried out the *Bruker Avance Neo* 400 MHz spectrometer at the given temperature. The obtained  $^1\text{H}$ - and  $^{13}\text{C}$ -NMR spectra were calibrated on the residual proton and natural abundance carbon signals of deuterated NMR solvents acetonitrile- $d_3$  and dichloromethane- $d_2$ . The obtained chemical shifts  $\delta$  are reported in ppm values, calibrated on tetramethylsilane. The observed signals were abbreviated as following: s = singlet, br = broad signal and combinations, d = doublet, t = triplet, q = quartet, p = quintet, h = septet, m = multiplet and qm = quartet of multiplets. The spectra were processed and analyzed on the software *MestReNova* (version 12.0.1-20560).

### FT-ATR-IR spectra

The attenuated total reflection infrared ATR-IR spectra were recorded on a *Perkin Elmer* spectrometer (*diamond ATR, Spectrum Two*) in the range of 400 – 4000  $\text{cm}^{-1}$  at room temperature under an argon atmosphere.

### Elemental analysis

The analysis was carried out by the central analytics laboratory of the *TUM Catalysis Research Center*. For the procedure 0.5 – 1.0 mg of the investigated compounds were closely packed within two layers of tin foil under an argon atmosphere and subsequently handed to the elemental analysis team. The Analysis was performed on a *EURO EA (HEKAtech)* instrument equipped with a CHNS combustion analyzer.

## LIFDI

Liquid Injection Field Desorption Ionization Mass Spectrometry (LIFDI-MS) was measured directly from an argon-filled glovebox with a *Thermo Fisher Scientific Exactive Plus Orbitrap* equipped with a *Linden CMS* ion source.<sup>[4]</sup>

## Melting Point

The Melting Points (m.p.) were determined in sealed glass capillaries under argon atmosphere using a *Büchi B-540* melting point apparatus.

## Single crystal X-ray diffraction analysis

The X-ray intensity data were collected on an X-ray single crystal diffractometer equipped with a CMOS detector (Bruker Photon-100), a rotating anode (Bruker TXS) with MoK $\alpha$  radiation ( $\lambda = 0.71073 \text{ \AA}$ ) and a Helios mirror optic by using the APEX4 software package<sup>[5]</sup> or an X-ray single crystal diffractometer equipped with a CMOS detector (Bruker Photon-100), an IMS microsource with MoK $\alpha$  radiation ( $\lambda = 0.71073 \text{ \AA}$ ) and a Helios mirror optic by using the APEX III software package.<sup>[5]</sup> The measurement was performed on single crystals coated with perfluorinated ether. The crystal was fixed on the top of a microsampler, transferred to the diffractometer and measured under a stream of cold nitrogen. A matrix scan was used to determine the initial lattice parameters. Reflections were merged and corrected for Lorenz and polarization effects, scan speed, and background using SAINT.<sup>[6]</sup> Absorption corrections, including odd and even ordered spherical harmonics were performed using SADABS.<sup>[7]</sup> Space group assignments were based upon systematic absences, E statistics, and successful refinement of the structures. Structures were solved by direct methods with the aid of successive difference Fourier maps, and were refined against all data using the APEX4<sup>[5]</sup> and OLEX2<sup>[8]</sup> in conjunction with SHELXL-2014<sup>[9]</sup> and SHELXLE.<sup>[10]</sup> Methyl hydrogen atoms were refined as part of rigid rotating groups, with a C–H distance of  $0.98 \text{ \AA}$  and  $\text{Uiso(H)} = 1.5 \cdot \text{Ueq(C)}$ . Other H atoms were placed in calculated positions and refined using a riding model, with methylene and aromatic C–H distances of  $0.99$  and  $0.95 \text{ \AA}$ , respectively, and  $\text{Uiso(H)} = 1.2 \cdot \text{Ueq(C)}$ . If not mentioned otherwise, non-hydrogen atoms were refined with anisotropic displacement parameters. Full-matrix least-squares refinements were carried out by minimizing  $\Delta w(\text{Fo}^2 - \text{Fc}^2)^2$  with SHELXL-97<sup>[11]</sup> weighting scheme. Neutral atom scattering factors for all atoms and anomalous dispersion corrections for the non-hydrogen atoms were taken from International Tables for Crystallography.<sup>[12]</sup> Images of the crystal structures were generated by PLATON and MERCURY.<sup>[13]</sup> The CCDC numbers CCDC- (2286080-2286083, 2286830) contain the supplementary crystallographic data for the structures **1MeCN**, [K(18c6)][1-F], **2**, **3** and **1**. These data can be obtained free of charge from the Cambridge Crystallographic Data Centre via <https://www.ccdc.cam.ac.uk/structures/>.

## 1.2 Synthesis and Characterization

### 1.2.1 Synthesis and characterization of 1·MeCN

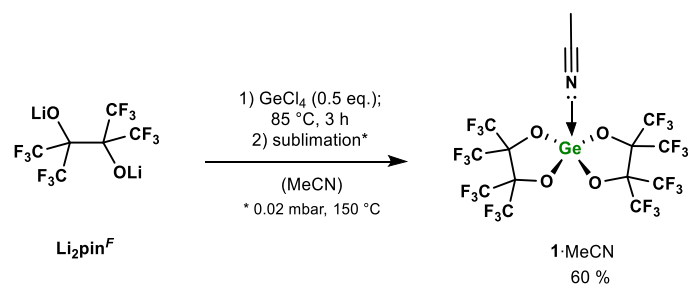

To a solution of 3.0 g (8.67 mmol, 2.0 equiv.) Li<sub>2</sub>pin<sup>F</sup> in 40 ml MeCN were added 0.49 ml (4.30 mmol, 1.0 equiv.) GeCl<sub>4</sub> at room temperature. The obtained solution slowly turned cloudy, and the reaction mixture was heated to 85 °C and stirred for 3 h. Afterwards, all volatiles were stripped off in vacuum and the obtained off-white solid was slowly heated to 150 °C and sublimated at a pressure of 0.02 mbar to give a colorless solid in 60 % yield.

Crystals suitable for SC-XRD analysis were obtained from a DCM solution at room temperature. For crystal structure please see Figure S 38.

**m.p.:** 142 -179 °C (sublimation and molten parts).

**<sup>1</sup>H-NMR** (400 MHz, acetonitrile-*d*<sub>3</sub>) δ (ppm) = 1.96 (s, 3H, NCCH<sub>3</sub>).

**<sup>13</sup>C NMR** (126 MHz, acetonitrile-*d*<sub>3</sub>) δ (ppm) = 122.2 (q, <sup>1</sup>J<sub>C-F</sub> = 293 Hz, CF<sub>3</sub>), 81.5 (br, OC(CF<sub>3</sub>)<sub>2</sub>).

**<sup>19</sup>F NMR** (377 MHz, acetonitrile-*d*<sub>3</sub>) δ (ppm) = -69.04 – -70.93 (m, 24F, CF<sub>3</sub>).

**Elemental Analysis calcd. [%] for C<sub>14</sub>H<sub>3</sub>F<sub>24</sub>NO<sub>4</sub>Ge:** C (21.62), H (0.39), N (1.80), S (-); found (%): C (21,15), H (0.30), N (1.17), S (-).

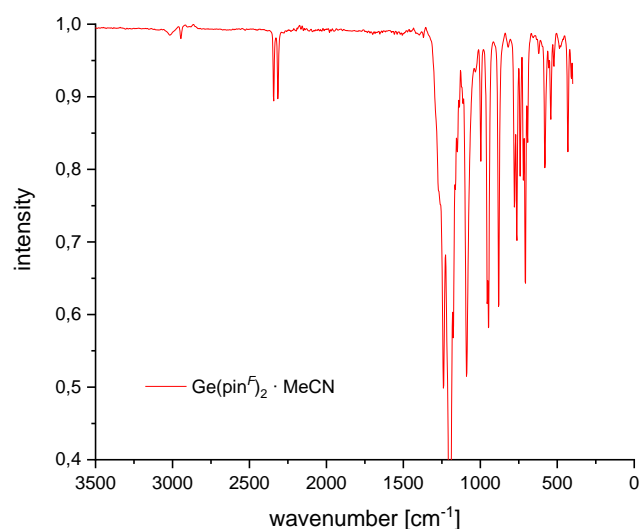

**Figure S 1:** FT-IR-spectrum of **1·CH<sub>3</sub>CN** showing two superimposed frequencies of blue-shifted C≡N and C–H vibrations originating from the coordinated acetonitrile.

## 1.2.2 Synthesis and characterization of acetonitrile-free germane **1**

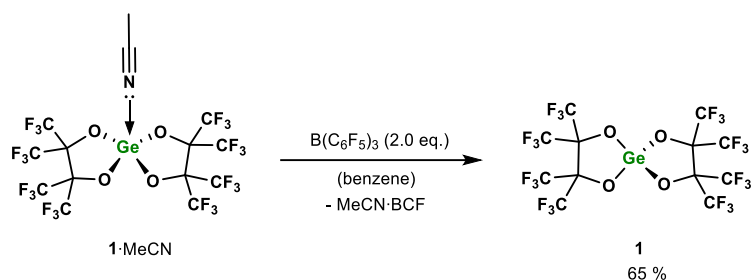

A mixture of 800 mg (1.03 mmol, 1.0 equiv.) **1**·MeCN and 1.05 g (2.06 mmol, 2.0 equiv.)  $B(C_6F_5)_3$  were dissolved in 4 mL of benzene and heated to 80 °C. For ensuring a complete dissolution and thus mixture of the reactants, the walls of the glass vessel were additionally gently heated with a heat gun. Afterwards, the obtained clear solution was slowly cooled to 0 °C. The formed precipitation was collected by filtration dried under reduced pressure. For a complete product separation, the crude-product was sublimated at 60 °C and a pressure of 0.02 mbar. Compound **1** was then collected as a crystalline, colorless solid in 65 % yield.

In comparison to compound **1**·MeCN, donor-free **1** shows slightly enhanced solubility in non-coordinating solvents like DCM or benzene.

Crystals suitable for SC-XRD analysis were obtained from a slow sublimation at 40 °C temperature and 1 bar of argon atmosphere. For crystal structure please see S 42.

**m.p.:** 67.1 – 71.9 °C (partially sublimated).

**$^{13}C$  NMR** (126 MHz, acetonitrile- $d_3$ )  $\delta$  (ppm) = 122.2 (q,  $^1J_{C-F}$  = 293 Hz,  $CF_3$ ), 81.5 (br,  $OC(CF_3)_2$ ).

**$^{19}F$  NMR** (377 MHz, acetonitrile- $d_3$ )  $\delta$  (ppm) = -68.93 – -71.19 (m, 24F,  $CF_3$ ).

**Elemental Analysis calcd. [%] for  $C_{12}F_{24}O_4Ge$ :** C (19.56), H (-), N (-), S (-); found (%): C (20.02), H (0.06), N (-), S (-).

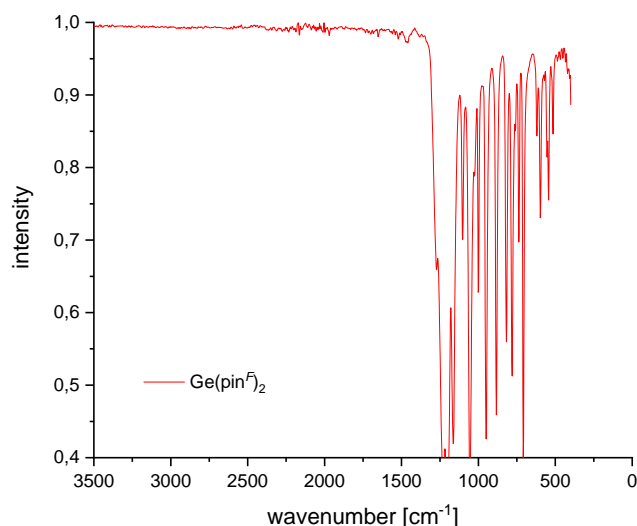

**Figure S 2:** FT-IR-spectrum of **1** showing the absence of the characteristic acetonitrile vibrations in the region of 2000 – 2500  $cm^{-1}$ .

### 1.2.3 Synthesis and characterization of acetonitrile-free silane 2

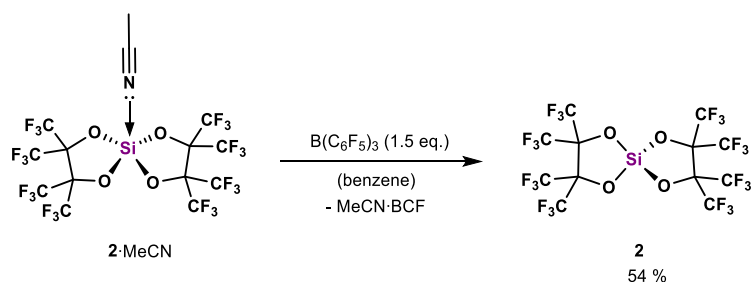

A mixture of 500 mg (682  $\mu\text{mol}$ , 1.0 equiv.) **2**·MeCN and 524 mg (614  $\mu\text{mol}$ , 1.5 equiv.)  $\text{B}(\text{C}_6\text{F}_5)_3$  were dissolved in 6 mL of benzene and heated to 80 °C. Complete dissolution was obtained by gently heating the glass walls with a heat gun. The obtained clear solution was slowly cooled to 0 °C and the formed precipitation was filtered off and washed with 1 ml benzene in the cold. After drying under reduced pressure, the solvent-free product **2** was obtained as a colorless solid in 54 % yield. Alternatively, the crude product can be purified by sublimation (60 °C, 0.04 mbar).

Crystals suitable for SC-XRD analysis were obtained from a slow sublimation at 40 °C temperature under 1 bar of argon atmosphere in a screw-cap glass vessel. For crystal structure please see Figure S 40.

**m.p.:** 66 – 68 °C.

**$^{13}\text{C}$  NMR** (126 MHz, acetonitrile- $d_3$ )  $\delta$  (ppm) = 122.0 (qm,  $^1J_{\text{C-F}} = 293$  Hz,  $\text{CF}_3$ ), 83.5 (br,  $\text{OC}(\text{CF}_3)_2$ ).

**$^{19}\text{F}$  NMR** (377 MHz, acetonitrile- $d_3$ )  $\delta$  (ppm) = -69.48 – -70.05 (m, 12F,  $\text{CF}_3$ ), -70.05 – -70.55 (m, 12F,  $\text{CF}_3$ ).

**$^{29}\text{Si}$  NMR** (99 MHz, acetonitrile- $d_3$ )  $\delta$  (ppm) = -110.33 (Si).

**Elemental Analysis calcd. [%] for  $\text{C}_{12}\text{F}_{24}\text{O}_4\text{Si}$ :** C (20.82), H (-), N (-), S (-); found (%): C (21.19), H (0.09), N (-), S (-).

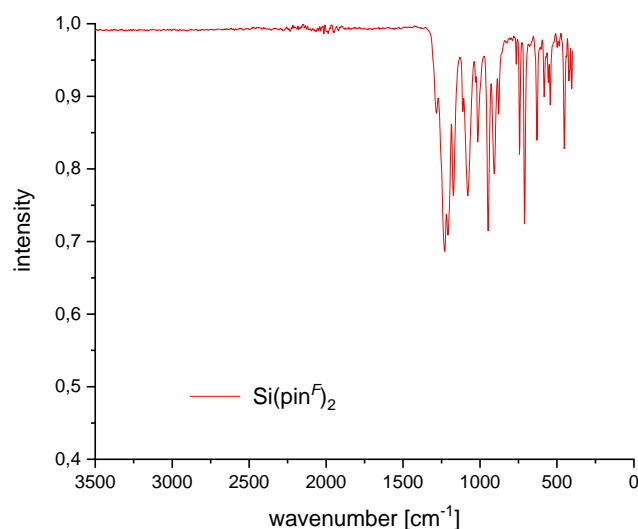

**Figure S 3:** FT-IR-spectrum of **2** showing the absence of the characteristic acetonitrile vibrations in the region of 2000 – 2500  $\text{cm}^{-1}$ .

### 1.2.4 Synthesis of and characterization of [K·(18-c-6)][1-F]

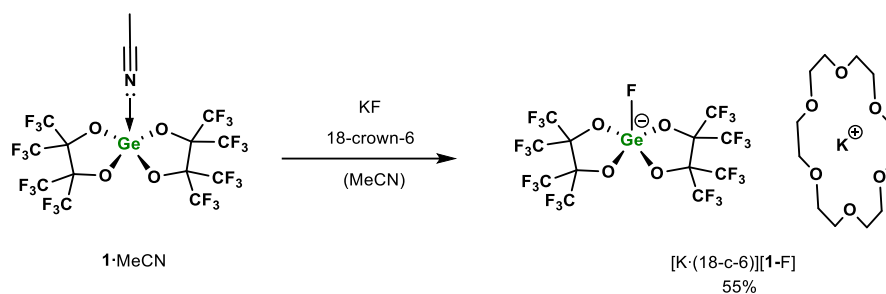

To synthesize the pentavalent fluorogermanate species  $[1-F]^-$ , 100 mg **1**·MeCN (129  $\mu\text{mol}$ , 1.0 equiv.), 7.50 mg KF (129  $\mu\text{mol}$ , 1.0 equiv.) were dissolved in 1.0 ml acetonitrile. To this solution and 34.0 mg (129  $\mu\text{mol}$ , 1.0 equiv.) 18-crown-6 dissolved in another 2.0 ml acetonitrile were added and the obtained solution was stirred for 230 minutes at room temperature. Afterwards, all volatile components were removed under reduced pressure. The obtained crude product was dissolved in 2.0 ml dichloromethane and precipitated by the addition of 10 ml hexane. The supernatant liquid phase was filtered off and the step was repeated once again. The obtained precipitation was then dried under reduced pressure to give a off-white solid in 55 % yield.

Crystals suitable for SC-XRD analysis were obtained from a saturated dichloromethane solution at  $-30\text{ }^\circ\text{C}$ . For crystal structure please see Figure S 39.

**m.p.:**  $204\text{--}225\text{ }^\circ\text{C}$  (decomposition).

**$^1\text{H}$  NMR** (400 MHz, acetonitrile- $d_3$ )  $\delta$  (ppm) = 3.57 (s, 24H, O-CH<sub>2</sub>-CH<sub>2</sub>-O).

**$^{13}\text{C}$  NMR** (126 MHz, acetonitrile- $d_3$ )  $\delta$  (ppm) = 122.8 (qm,  $^1J_{\text{C-F}} = 293\text{ Hz}$ , CF<sub>3</sub>), 81.6 (br, OC(CF<sub>3</sub>)<sub>2</sub>), 70.8 (s, OCH<sub>2</sub>).

**$^{19}\text{F}$  NMR** (377 MHz, acetonitrile- $d_3$ )  $\delta$  (ppm) =  $-69.79\text{--}-70.14$ (m, 12F, CF<sub>3</sub>),  $-70.76\text{--}-70.97$  (m, 12F, CF<sub>3</sub>),  $-145.04\text{--}-145.25$  (h,  $J = 8.3\text{ Hz}$ , 1F, Si-F).

**Elemental Analysis calcd. [%] for C<sub>24</sub>H<sub>24</sub>F<sub>25</sub>GeKO<sub>10</sub>:** C (27.22), H (2.28), N (-), S (-); found (%): C (27.36), H (1.95), N (-), S (-).

### 1.2.5 Synthesis of and characterization of [MeCN·SiEt<sub>3</sub>][H-1]

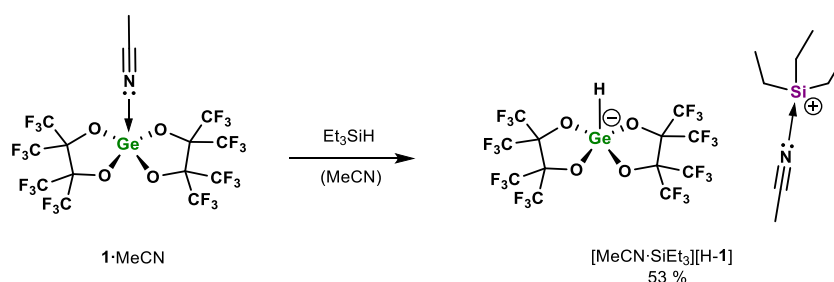

To a solution of 100 mg (129  $\mu\text{mol}$ , 1.0 equiv.) **1**·MeCN diluted in 2.0 ml acetonitrile were added 15 mg (129  $\mu\text{mol}$ , 5.0 equiv.) Et<sub>3</sub>SiH at room temperature. The obtained solution was heated to  $80\text{ }^\circ\text{C}$  for 30 minutes. Afterwards all volatiles were removed under reduced pressure to give the product as a colorless solid in 53 % yield.

**m.p.:**  $81\text{--}86\text{ }^\circ\text{C}$ .



**<sup>1</sup>H NMR** (400 MHz, acetonitrile-*d*<sub>3</sub>) δ (ppm) = 6.44 – 6.38 (m, 1H, GeH), 1.96 (s, 3H, NCCH<sub>3</sub>), 1.10 – 0.99 (m, 15H, CH<sub>2</sub>CH<sub>3</sub>).

**<sup>13</sup>C NMR** (126 MHz, acetonitrile-*d*<sub>3</sub>) δ (ppm) = 123.5 (q, <sup>1</sup>J<sub>C-F</sub> = 293 Hz, CF<sub>3</sub>), 123.1 (q, <sup>1</sup>J<sub>C-F</sub> = 293 Hz, CF<sub>3</sub>), 82.2 (br, OC(CF<sub>3</sub>)<sub>2</sub>), 6.13 (s, CH<sub>2</sub>), 4.11 (s, CH<sub>3</sub>).

**<sup>19</sup>F NMR** (377 MHz, acetonitrile-*d*<sub>3</sub>) δ (ppm) = -70.18 – -70.35 (m, 12F, CF<sub>3</sub>), -70.63 – -70.82 (m, 12F, CF<sub>3</sub>).

**<sup>29</sup>Si NMR** (99 MHz, acetonitrile-*d*<sub>3</sub>) δ (ppm) = 36.38 (s, Et<sub>3</sub>Si<sup>+</sup>).

**Elemental Analysis calcd. [%] for C<sub>20</sub>H<sub>19</sub>F<sub>24</sub>GeNO<sub>4</sub>Si:** C (26.87), H (2.44), N (1.57), S (-); **found (%)**: C (26.58), H (1.63), N (1.67), S (-).

### 1.2.6 Synthesis of and characterization of dioxane-bridged germylene 3

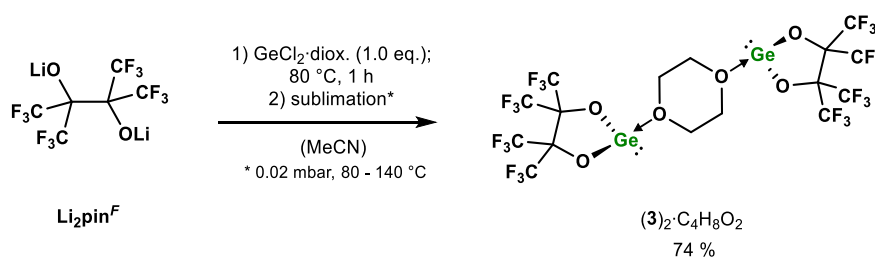

A mixture of 600 mg (1.73 mmol, 1.0 equiv.) Li<sub>2</sub>pin<sup>F</sup> and 402 mg (1.73 mmol, 1.0 equiv.) GeCl<sub>2</sub>·1,4-dioxane was dissolved in 5 ml acetonitrile. The solution immediately turned opaque because of LiCl precipitation and was further heated to 80 °C for 1 hour to ensure complete conversion. Afterwards all volatiles were removed under reduced pressure at 0 °C to give the crude product. The title compound was isolated by twofold sublimation at 0.02 mbar while slowly heating from 80 °C to 140 °C over a 2-hour period.

Dioxane could not be removed under reduced pressure. The product additionally contains impurities of acetonitrile, which could not be removed. Single crystals suitable for XRD analysis were obtained from saturated DCM solution at -30 °C (Figure S 41).

**m.p.:** 72 – 75 °C.

**<sup>1</sup>H NMR** (500 MHz, dichloromethane-*d*<sub>2</sub>) δ (ppm) = 3.89 (s, CH<sub>2</sub>).

**<sup>13</sup>C NMR** (126 MHz, dichloromethane-*d*<sub>2</sub>) δ (ppm) = 122.2 (q, <sup>1</sup>J<sub>C-F</sub> = 294 Hz), 88.4 (br, OC(CF<sub>3</sub>)<sub>2</sub>), 67.1 (s, CH<sub>2</sub>).

**<sup>19</sup>F NMR** (377 MHz, dichloromethane-*d*<sub>2</sub>) δ (ppm) = -70.6 (s, 12F, CF<sub>3</sub>).

## 2 NMR experiments with 1·MeCN

### 2.1 Lewis acidity determination by Gutmann-Beckett method

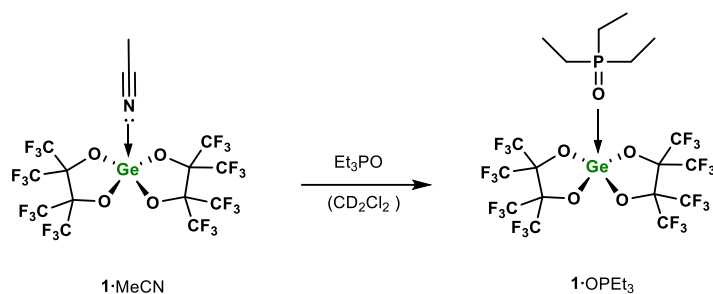

For the Lewis acidity assessment of the obtained compounds the by Gutmann-Beckett was applied. In case of **1**·MeCN, 6.00 mg (7.71  $\mu\text{mol}$ , 1.0 equiv.) of the Lewis acid were dissolved in 0.4 ml dichloromethane- $d_2$  and reacted with 1.03 mg  $\text{Et}_3\text{PO}$  (7.71  $\mu\text{mol}$ , 1.0 equiv.) in a gas-tight J-Young NMR tube. The obtained clear solution was analyzed by  $^1\text{H}$ ,  $^{19}\text{F}$  and  $^{31}\text{P}$  NMR spectroscopy. The exact same spectra were also obtained for solvent free **1**. In this case, however, the broad signal overlapping signal at 2.03 ppm was absent.

$^1\text{H}$  NMR (400 MHz,  $\text{CD}_2\text{Cl}_2$ )  $\delta$  (ppm) = 2.03 (br, 3H,  $\text{NCCH}_3$ ) 2.11 (dq,  $^2J_{\text{P-H}} = 12.4$  Hz,  $^3J_{\text{H-H}} = 7.7$  Hz, 6H,  $\text{PCH}_2$ ), 1.26 (dt,  $^2J_{\text{P-H}} = 12.4$  Hz,  $^3J_{\text{H-H}} = 7.7$  Hz, 9H,  $\text{PCH}_2\text{CH}_3$ ).

$^{19}\text{F}$ -NMR (149 MHz,  $\text{CD}_2\text{Cl}_2$ )  $\delta$  (ppm) = -69.19 – -69.99 (m, 24F,  $\text{CF}_3$ ).

$^{31}\text{P}$  NMR (162 MHz,  $\text{CD}_2\text{Cl}_2$ )  $\delta$  (ppm) = 89.13 (s).

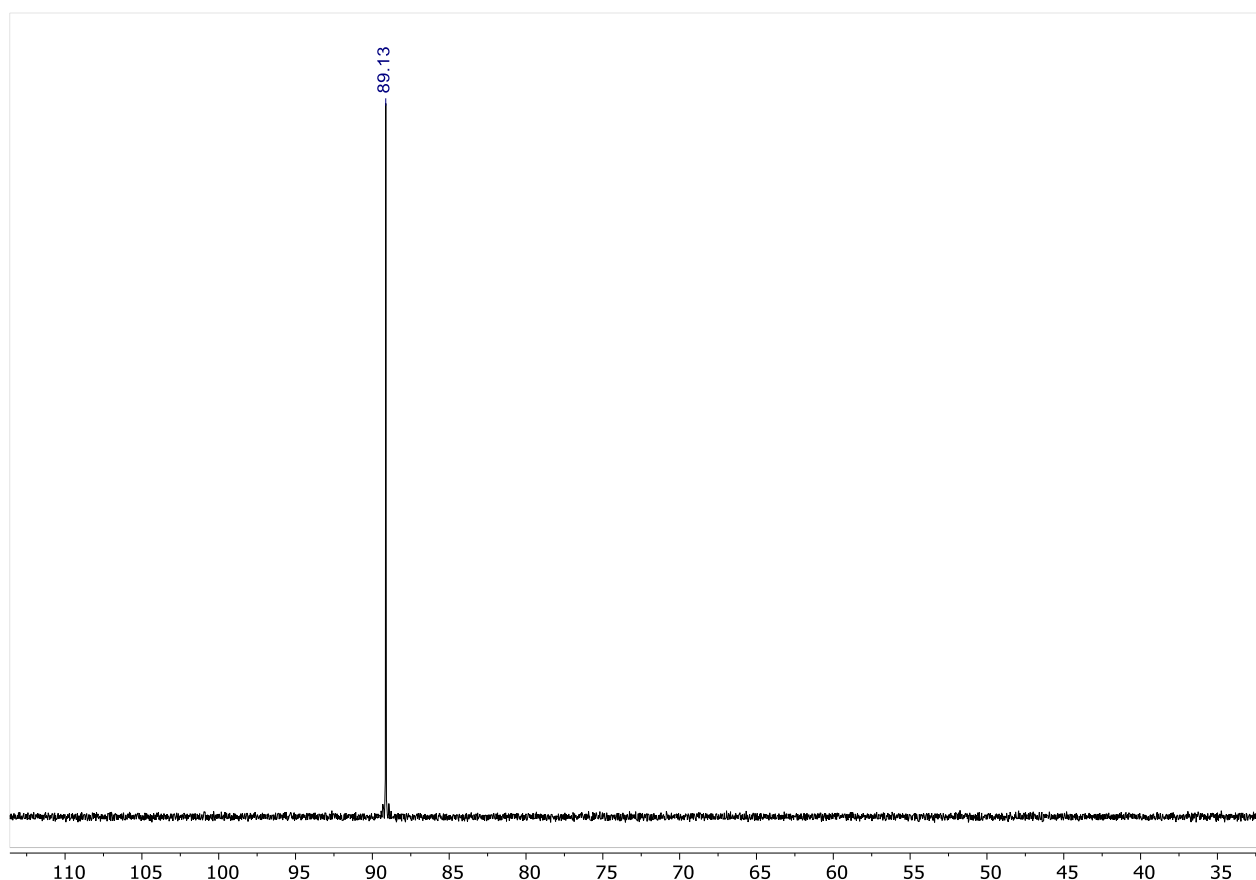

**Figure S 4:**  $^{31}\text{P}$  NMR spectrum of **1**· $\text{OPEt}_3$  obtained by the reaction of **1**·MeCN with  $\text{Et}_3\text{PO}$  in dichloromethane- $d_2$ .

The same sample was additionally treated with another equivalent of  $\text{Et}_3\text{PO}$  (total of 2.0 equiv.) and again analyzed by  $^{31}\text{P}$  NMR spectroscopy. Figure S 5 shows a stack of free  $\text{Et}_3\text{PO}$  and the obtained coordination products.

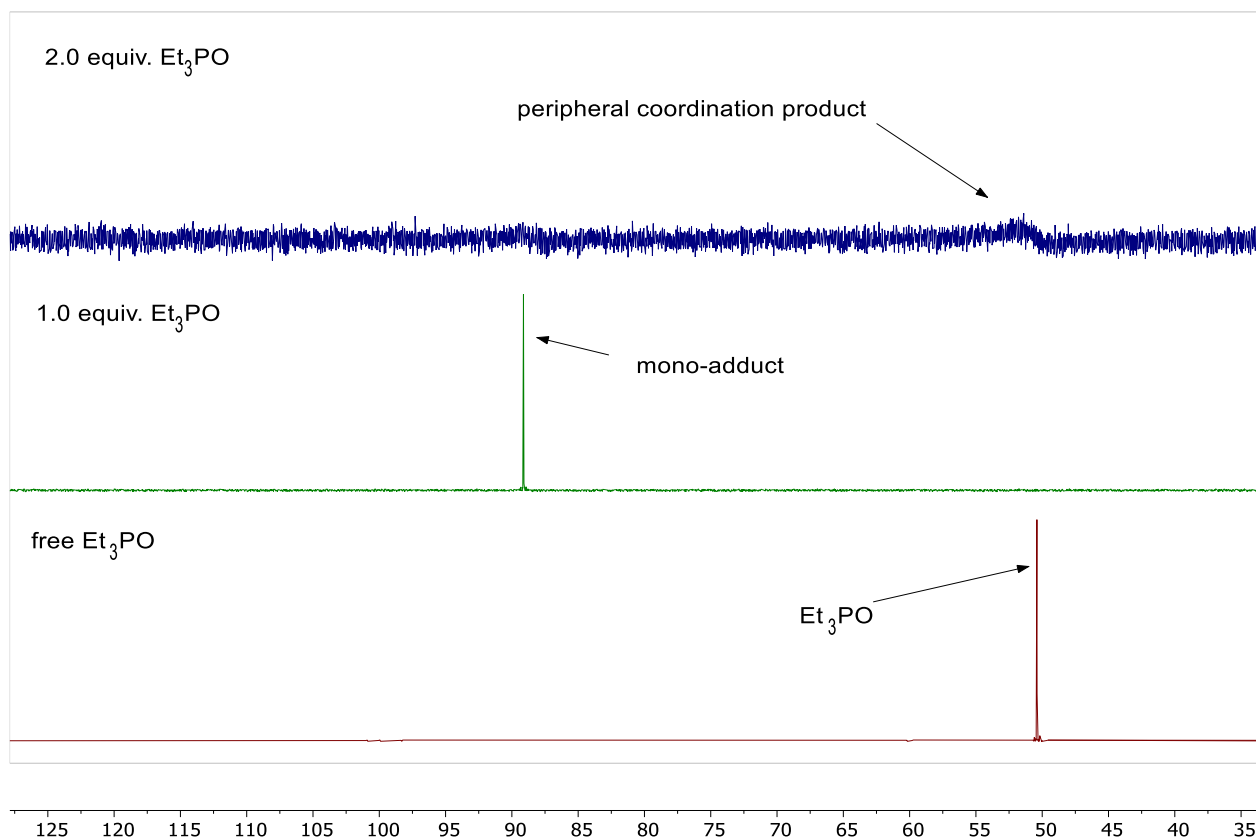

**Figure S 5:** Stacked  $^{31}\text{P}$  NMR spectra of the reaction of **1**·MeCN with 1.0 and 2.0 equiv. of  $\text{Et}_3\text{PO}$  in dichloromethane- $d_2$  at 300 K.

## 2.2 NMR-Scale Abstraction Experiments

### 2.2.1 Reaction of 1·MeCN with AgSbF<sub>6</sub>

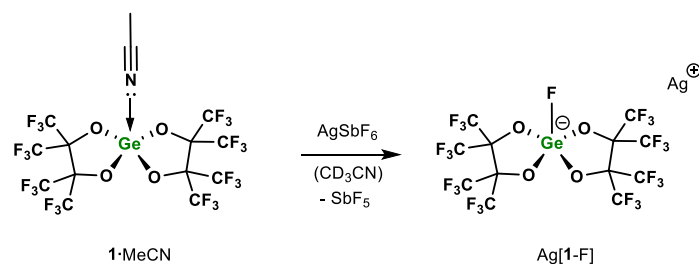

A mixture of 16.0 mg (20.6  $\mu\text{mol}$ , 1.0 equiv.) **1**·MeCN and 7.10 (20.7  $\mu\text{mol}$ , 1.0 equiv.) AgSbF<sub>6</sub> was placed in a PTFE-valved J-Young NMR tube and dissolved in 0.4 ml of acetonitrile-*d*<sub>3</sub>. The obtained solution was heated to 60 °C for one hour and afterwards analyzed by multinuclear NMR spectroscopy.

**<sup>13</sup>C NMR** (126 MHz, acetonitrile-*d*<sub>3</sub>)  $\delta$  (ppm) = 122.7 (qm, <sup>1</sup>J<sub>C-F</sub> = 295 Hz, CF<sub>3</sub>), 81.6 (br, OC(CF<sub>3</sub>)<sub>2</sub>).

**<sup>19</sup>F NMR** (149 MHz, acetonitrile-*d*<sub>3</sub>)  $\delta$  (ppm) = -69.83 – -70.12 (m, 12F, CF<sub>3</sub>), -70.67 – -71.02 (m, 12F, CF<sub>3</sub>), -145.00 – -145.24 (m, 1F, Ge-F).

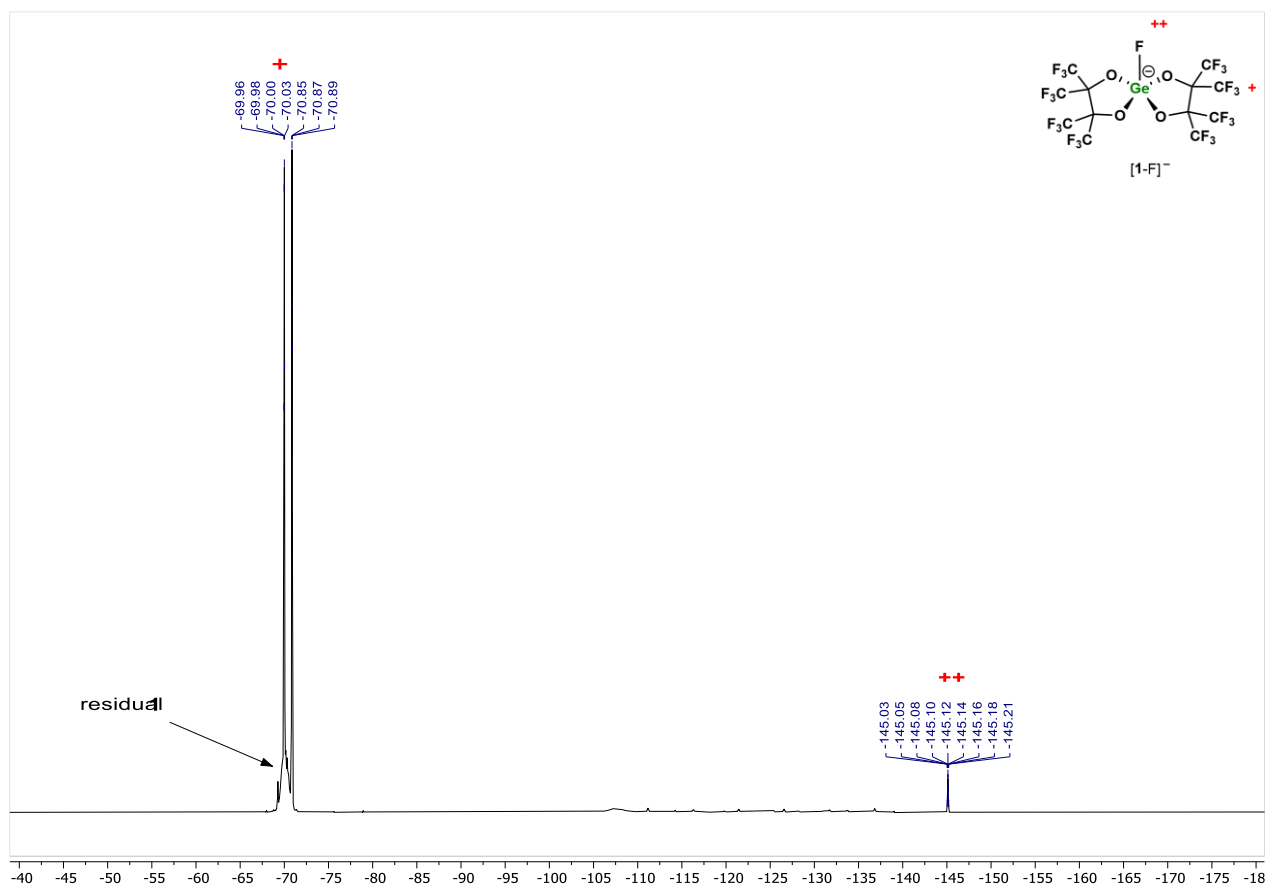

**Figure S 6:** <sup>19</sup>F NMR of the reaction mixture after 1h at 60 °C showing the formation of the fluorogermanate anion [1-F]<sup>-</sup>, thus confirming a successful fluoride abstraction.

## 2.2.2 Reaction of 1·MeCN with [Mes<sub>3</sub>PH][HB(C<sub>6</sub>F<sub>5</sub>)<sub>3</sub>]

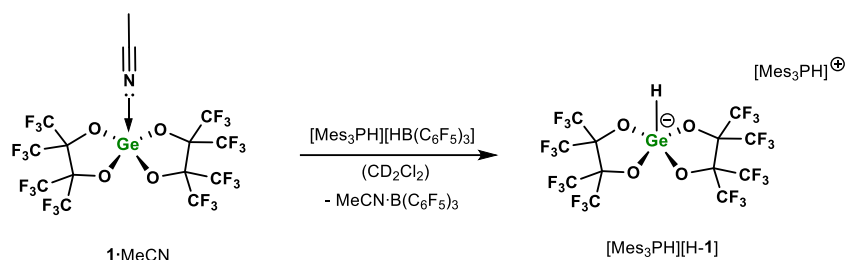

To a solution of [Mes<sub>3</sub>PH][HB(C<sub>6</sub>F<sub>5</sub>)<sub>3</sub>] in 0.4 ml CD<sub>2</sub>Cl<sub>2</sub> was added 1·MeCN. The reaction mixture was transferred into a J-Young NMR tube and shaken until a clear solution was obtained. Reaction progress was traced by <sup>1</sup>H, <sup>11</sup>B and <sup>19</sup>F NMR spectroscopy.

For further verifying the hydride abstraction from [HB(C<sub>6</sub>F<sub>5</sub>)<sub>3</sub>]<sup>−</sup> the obtained reaction mixture was compared to separately synthesized MeCN·B(C<sub>6</sub>F<sub>5</sub>)<sub>3</sub>.

**<sup>1</sup>H NMR** (400 MHz, CD<sub>2</sub>Cl<sub>2</sub>) δ (ppm) = δ 8.25 (d, <sup>1</sup>J<sub>P-H</sub> = 478.1 Hz, 1H, PH), 7.13 (d, <sup>4</sup>J<sub>P-H</sub> = 36.1 Hz, 6H, *m*-ArH), 6.47 – 6.41 (m, 1H, GeH), 2.39 (s, 9H, *p*-Ar-CH<sub>3</sub>), 2.30 (s, 9H, *o*-Ar-CH<sub>3</sub>), 2.02 (s, 9H, *o*-Ar-CH<sub>3</sub>).

**<sup>11</sup>B NMR** (128 MHz, CD<sub>2</sub>Cl<sub>2</sub>) δ (ppm) = -10.68 (s, B(C<sub>6</sub>F<sub>5</sub>)<sub>3</sub>).

**<sup>19</sup>F-NMR** (377 MHz, CD<sub>2</sub>Cl<sub>2</sub>) δ (ppm) = -69.80 – -69.98 (m, 12F, CF<sub>3</sub>), -70.36 – -70.53 (m, 12F, CF<sub>3</sub>).

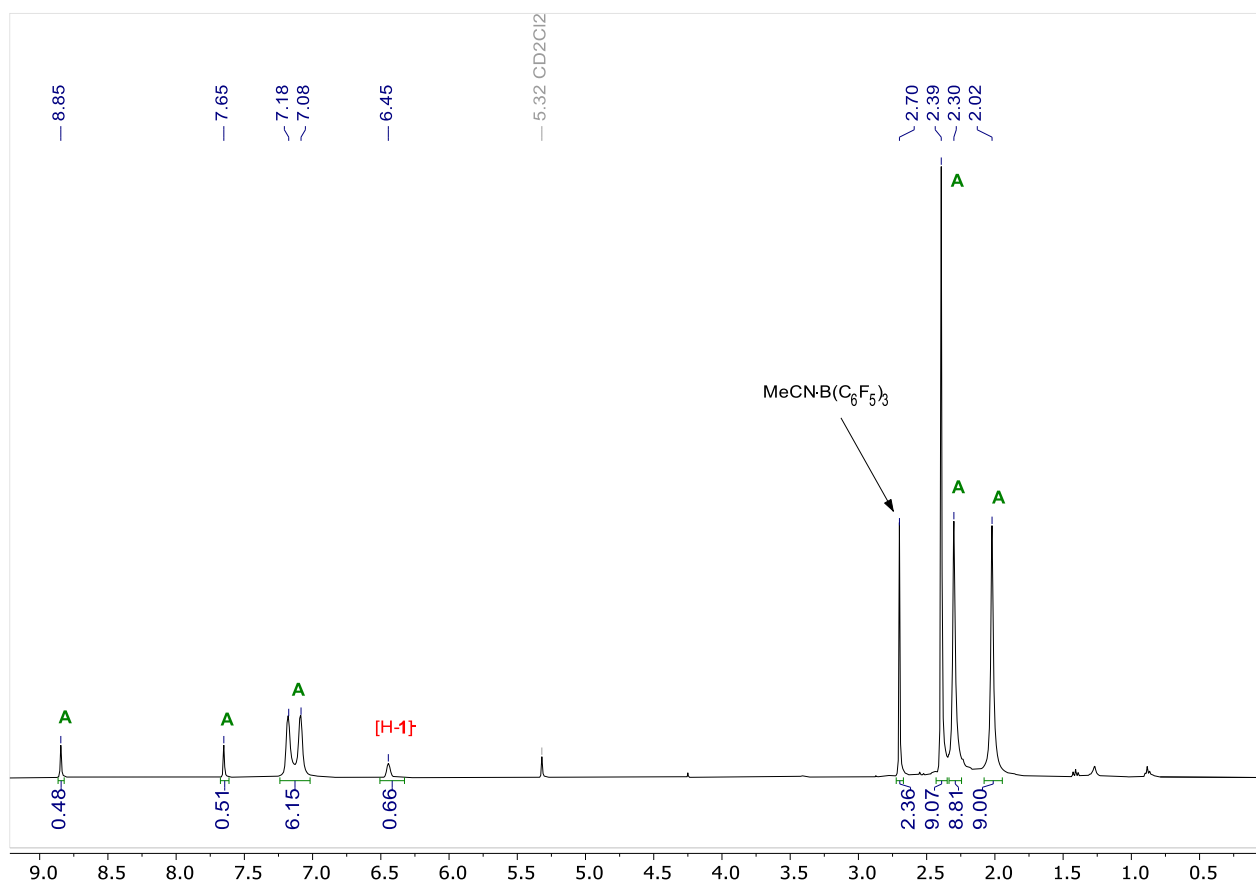

**Figure S 7:** <sup>1</sup>H NMR of the reaction mixture after complete dissolution of the reactants in CD<sub>2</sub>Cl<sub>2</sub> showing the formation of the hydrido germanate anion [H-1]<sup>−</sup> with the [Mes<sub>3</sub>PH] (A) counter cation. No [HB(C<sub>6</sub>F<sub>5</sub>)<sub>3</sub>] signal could be observed.

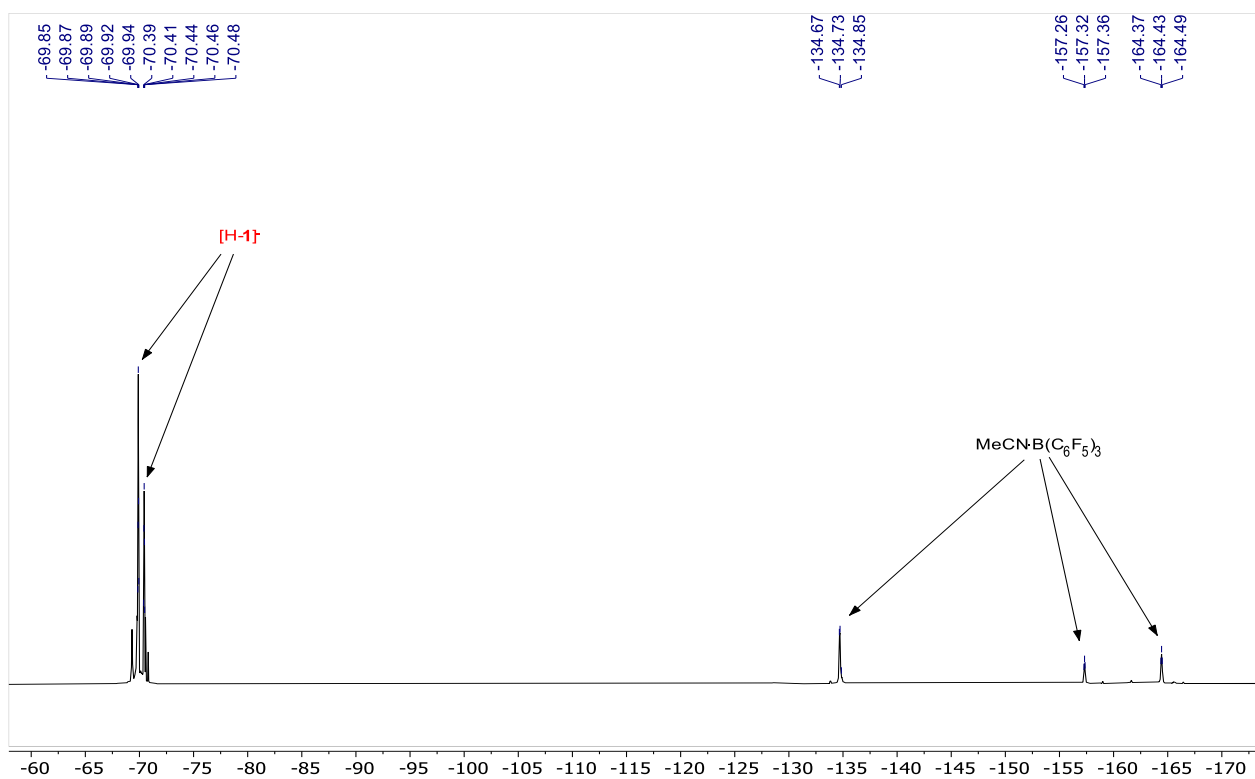

**Figure S 8:**  $^{19}\text{F}$  NMR of the reaction mixture showing the presence of hydrido germanate anion  $[\text{H-1}]^-$  and MeCN-coordinated BCF. No  $[\text{HB}(\text{C}_6\text{F}_5)_3]$  signals are present.

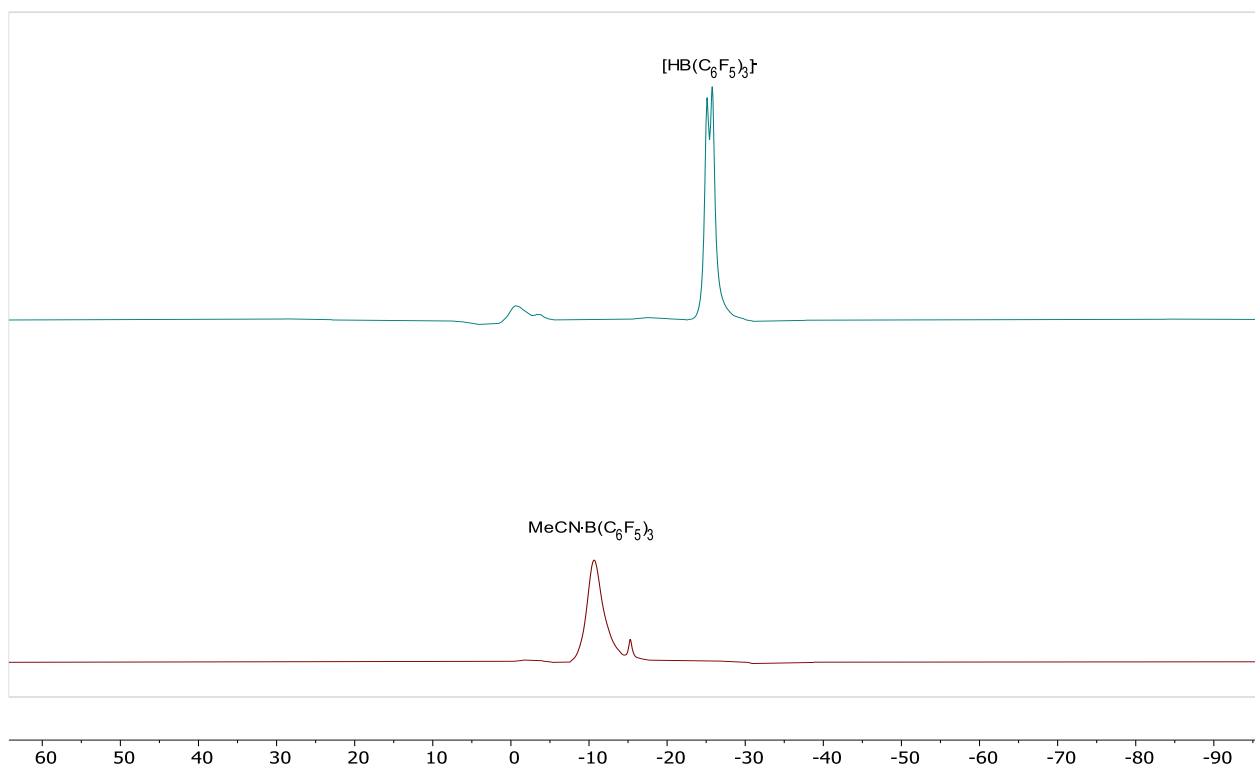

**Figure S 9:** Stacked  $^{11}\text{B}$  NMR showing the characteristic doublet of  $[\text{HB}(\text{C}_6\text{F}_5)_3]$  before  $\mathbf{1}\cdot\text{MeCN}$  was added to the reaction mixture (top) and the signal of MeCN-coordinated BCF after addition of  $\mathbf{1}\cdot\text{MeCN}$  (bottom).

### 2.2.3 Reaction of 1·MeCN with Et<sub>3</sub>SiF

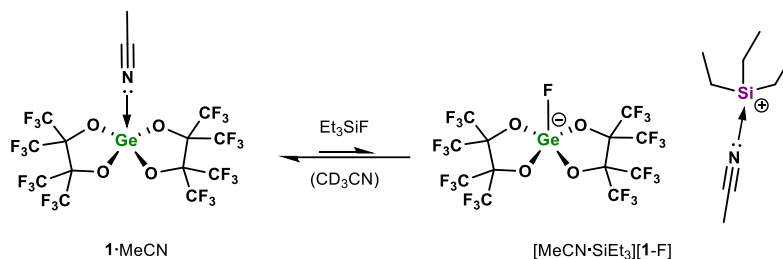

To 10 mg (12.9  $\mu\text{mol}$ , 1.0 equiv.) of 1·MeCN in 0.4 ml acetonitrile-*d*<sub>3</sub> were added 17.3 mg (129  $\mu\text{mol}$ , 10.0 equiv.) Et<sub>3</sub>SiF in a PTFE-valved J-Young NMR tube. The obtained solution was analyzed by multinuclear NMR spectroscopy. No difference in reaction conversion was observed at longer periods at room temperature or upon heating to 80 °C for several hours. The conversion progress correlated with the amount of added Et<sub>3</sub>SiF. When fewer equivalents Et<sub>3</sub>SiF were used, significantly lower conversion was observed.

**<sup>1</sup>H-NMR** (500 MHz, acetonitrile-*d*<sub>3</sub>)  $\delta$  (ppm) = 1.96 (s, 3H, NCCH<sub>3</sub>), 1.11 – 1.02 (m, 15H, CH<sub>3</sub>).

**<sup>13</sup>C NMR** (126 MHz, acetonitrile-*d*<sub>3</sub>)  $\delta$  (ppm) = 122.8 (qm, <sup>1</sup>J<sub>C-F</sub> = 295 Hz, CF<sub>3</sub>), 81.5 (br, OC(CF<sub>3</sub>)<sub>2</sub>), 6.18 (s, CH<sub>2</sub>), 4.16 (s, CH<sub>3</sub>).

**<sup>19</sup>F-NMR** (377 MHz, acetonitrile-*d*<sub>3</sub>)  $\delta$  (ppm) = -69.88 – -70.11 (m, 12F, CF<sub>3</sub>), -70.76 – -70.99 (m, 12F, CF<sub>3</sub>), -145.05 – -145.31 (m, 1F, Ge-F).

**<sup>29</sup>Si NMR** (99 MHz, acetonitrile-*d*<sub>3</sub>)  $\delta$  (ppm) = 36.60 (s, Et<sub>3</sub>Si<sup>+</sup>).

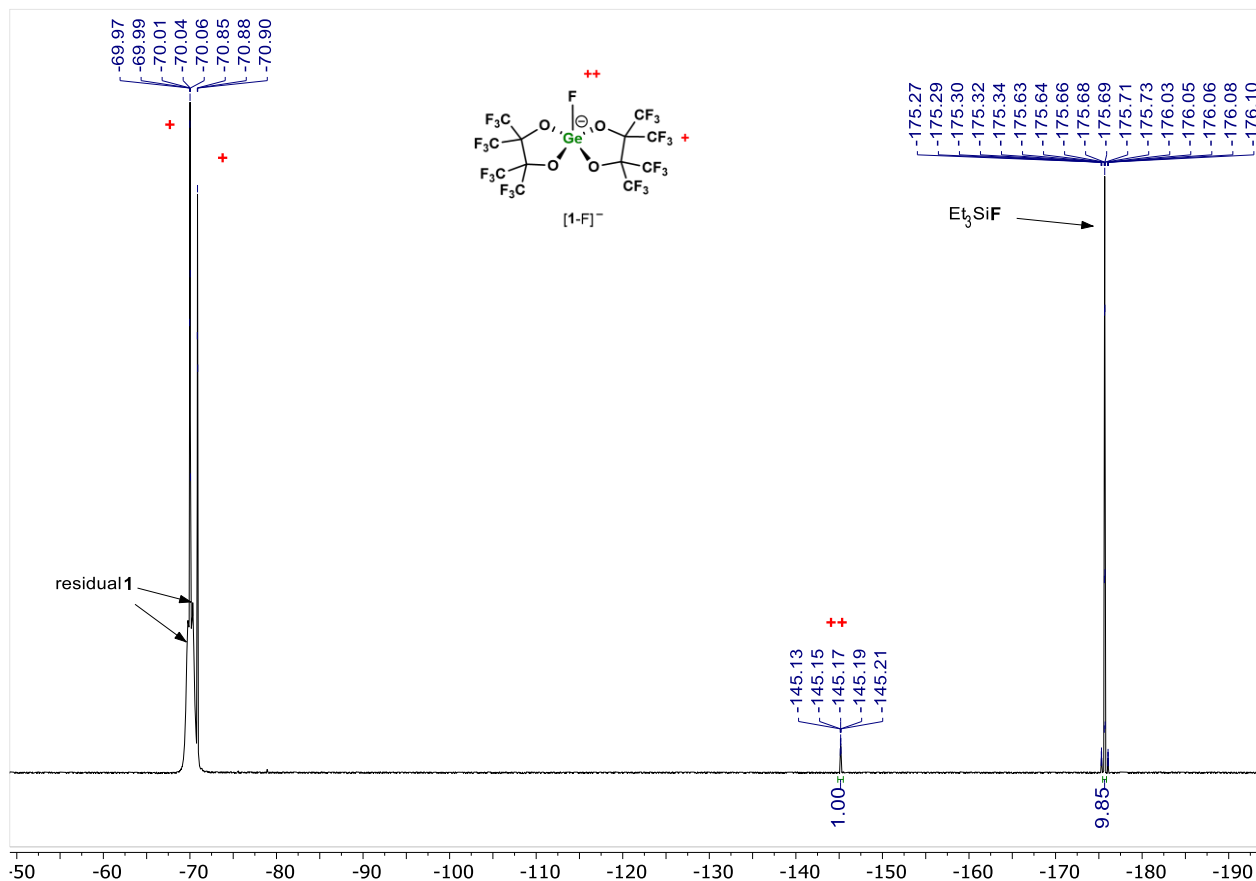

**Figure S 10:**  $^{19}\text{F}$  NMR of the reaction mixture showing the partial formation of the fluorogermanate anion  $[\mathbf{1}\text{-F}]^-$  in an reaction equilibrium, thus confirming a successful fluoride abstraction when a surplus of  $\text{Et}_3\text{SiF}$  is present. No further reaction progress was observed after various periods or upon heating.

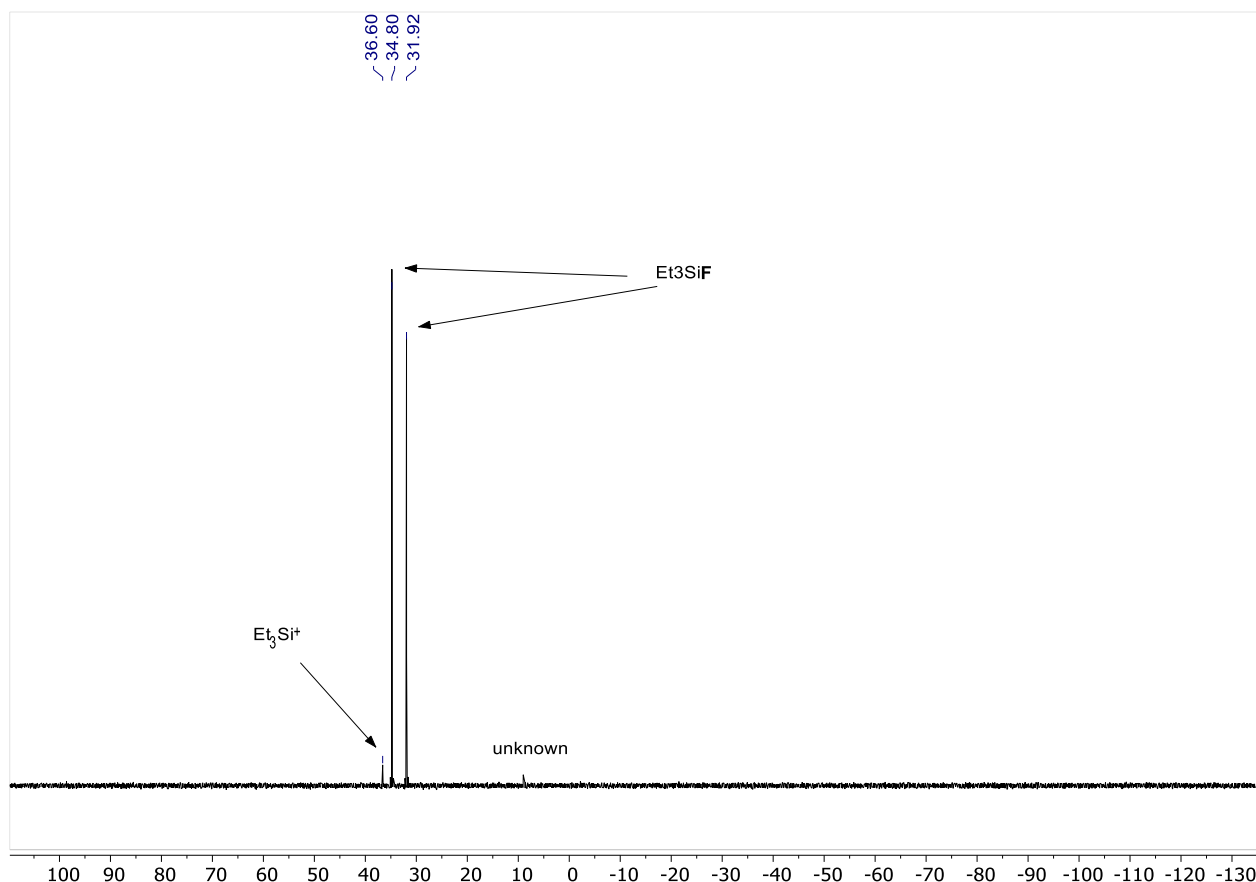

**Figure S 11:**  $^{29}\text{Si}\{^1\text{H}\}$  NMR of the reaction mixture showing the partial formation of the MeCN-coordinated silyl cation ( $\text{Et}_3\text{Si}^+$ ) next to the characteristic doublet ( $^1J_{\text{Si-F}} = 286$  Hz) of  $\text{Et}_3\text{SiF}$ .

#### 2.2.4 Reaction of acetonitrile-free **1** with $\text{Et}_3\text{SiH}$

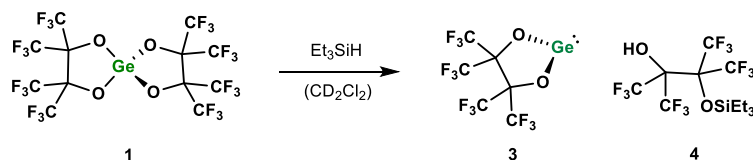

To a suspension of 30 mg (40.7 mmol, 1.0 equiv.) of **1** in 0.4 ml of dichloromethane- $d_2$  were added 6.50  $\mu\text{l}$  (40.7 mmol, 1.0 equiv.)  $\text{Et}_3\text{SiH}$  in a PTFE-sealed J-Young NMR tube. The obtained solution was analyzed by multi nuclear NMR spectroscopy. Product separation and isolation failed in multiple attempts.

**$^1\text{H}$ -NMR** (400 MHz, dichloromethane- $d_2$ )  $\delta$  (ppm) = 3.94(s, 1H, OH), 0.98 (t,  $^3J_{\text{H-H}} = 7.9$  Hz, 9H,  $\text{CH}_3$ ), 0.80 (q,  $^3J_{\text{H-H}} = 8.0$  Hz, 6H,  $\text{CH}_2$ ).

**$^{13}\text{C}$  NMR** (126 MHz, dichloromethane- $d_2$ )  $\delta$  (ppm) = 121.5 (qm,  $^1J_{\text{C-F}} = 293$  Hz,  $\text{CF}_3$ ), 121.9 (q,  $^1J_{\text{C-F}} = 293$  Hz,  $\text{CF}_3$ ), 88.8 (br,  $\text{GeOC}(\text{CF}_3)_2$ ), 82.9 (p,  $^2J_{\text{C-F}} = 31.2$  Hz,  $\text{HO}(\text{C}(\text{CF}_3)_2\text{OSi})$ ), 81.4(p,  $^2J_{\text{C-F}} = 30.4$  Hz,  $\text{HO}(\text{C}(\text{CF}_3)_2\text{OSi})$ ), 6.41 (s,  $\text{CH}_2$ ), 5.76 (s,  $\text{CH}_3$ ).



$^{19}\text{F}$ -NMR (377 MHz, dichloromethane- $d_2$ )  $\delta$  (ppm) = -68.97 – -69.26 (m, 6F, HO- $\text{CCF}_3$ ), -69.90 – -70.14 (m, 6F, SiO- $\text{CCF}_3$ ), -70.91 (s, 12F,  $\text{Ge}(\text{OC}(\text{CF}_3)_2)_2$ ).

$^{29}\text{Si}$  NMR (99 MHz, dichloromethane- $d_2$ )  $\delta$  (ppm) = 31.69 (s,  $\text{SiEt}_3$ ).

## LIFDI-MS

For further investigation a high resolution LIFDI-MS analysis of the reaction mixture was performed, revealing the cleavage of the Si-O bond and consecutive hydride abstraction, by selectively giving the mass pattern for the hydrido germanate anion  $[\text{H-1}]^-$  in negative mode:

calculated for  $[\text{C}_{12}\text{HF}_{24}\text{GeO}_4]^-$ : 738.87056

observed: 738.87157

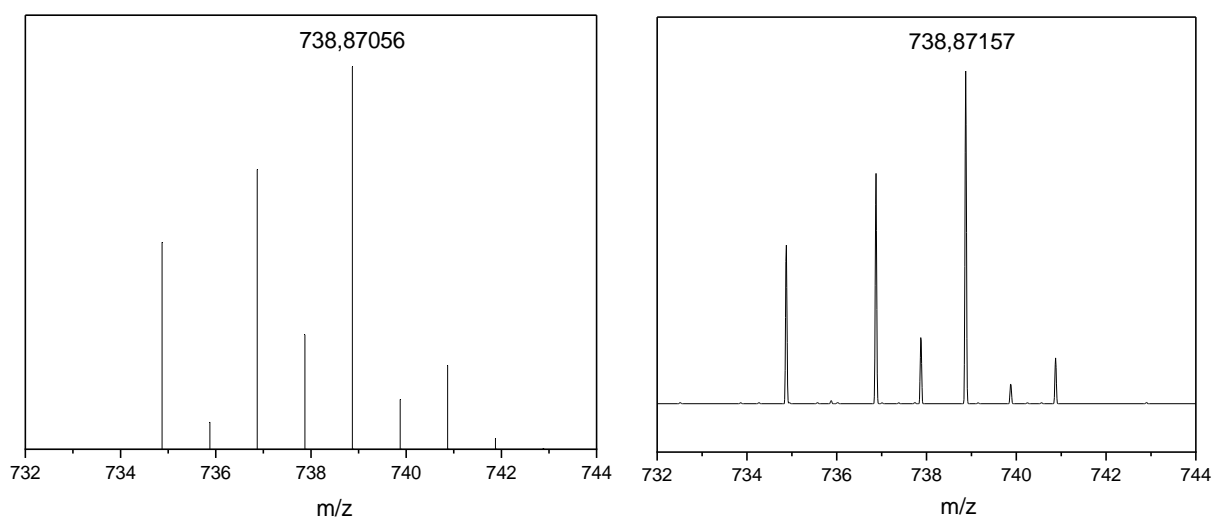

**Figure S12:** LIFDI-MS spectrometry (detail view with isotope pattern) of **3** obtained in negative mode. Measured (right;  $m/z = 738.87157$ ) and simulated (left;  $m/z = 738.87056$ ) mass spectrum.

## Low Temperature NMR

At lower temperatures the thermodynamically favored dimerization of the perfluoropinacolato germylene is observed, leading to the formation of complex **4**. As a result of decreasing symmetry upon dimerization the sharp singlet at  $\delta = -70.91$  ppm completely disappears at  $-80$  °C due to heavy broadening. A related trend is also seen in the  $^{29}\text{Si}$  NMR spectra where the silicon signal of the silylated alcohol shifts from  $\delta = -31.69$  ppm ( $25$  °C) to  $\delta = -33.65$  ppm ( $-80$  °C). This could be an effect of weak coordination at room temperature that decreases in favor of the germylene dimerization at low temperatures.

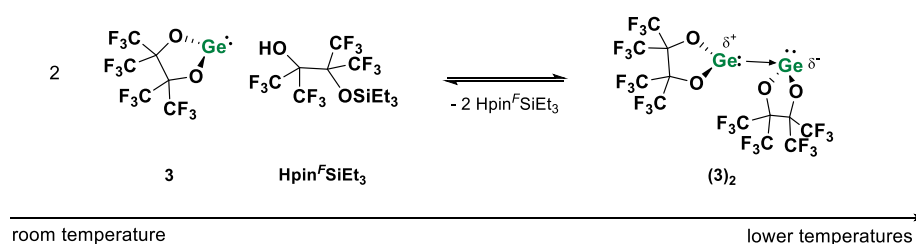

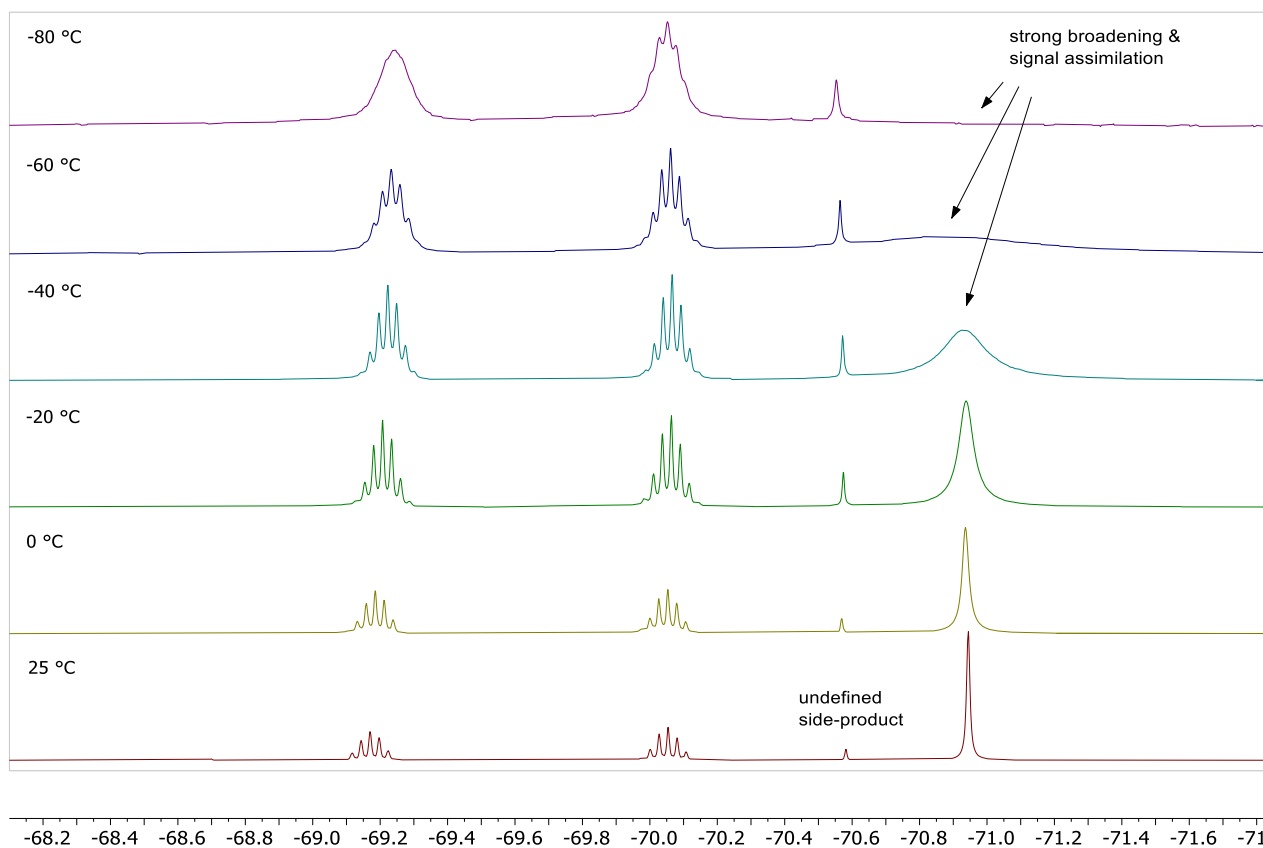

**Figure S 13:** Stacked  $^{19}\text{F}$  NMR spectra in  $\text{CD}_2\text{Cl}_2$  of a freshly prepared mixture of **3** and **4** at a temperature range from -80  $^{\circ}\text{C}$  to 25  $^{\circ}\text{C}$ .

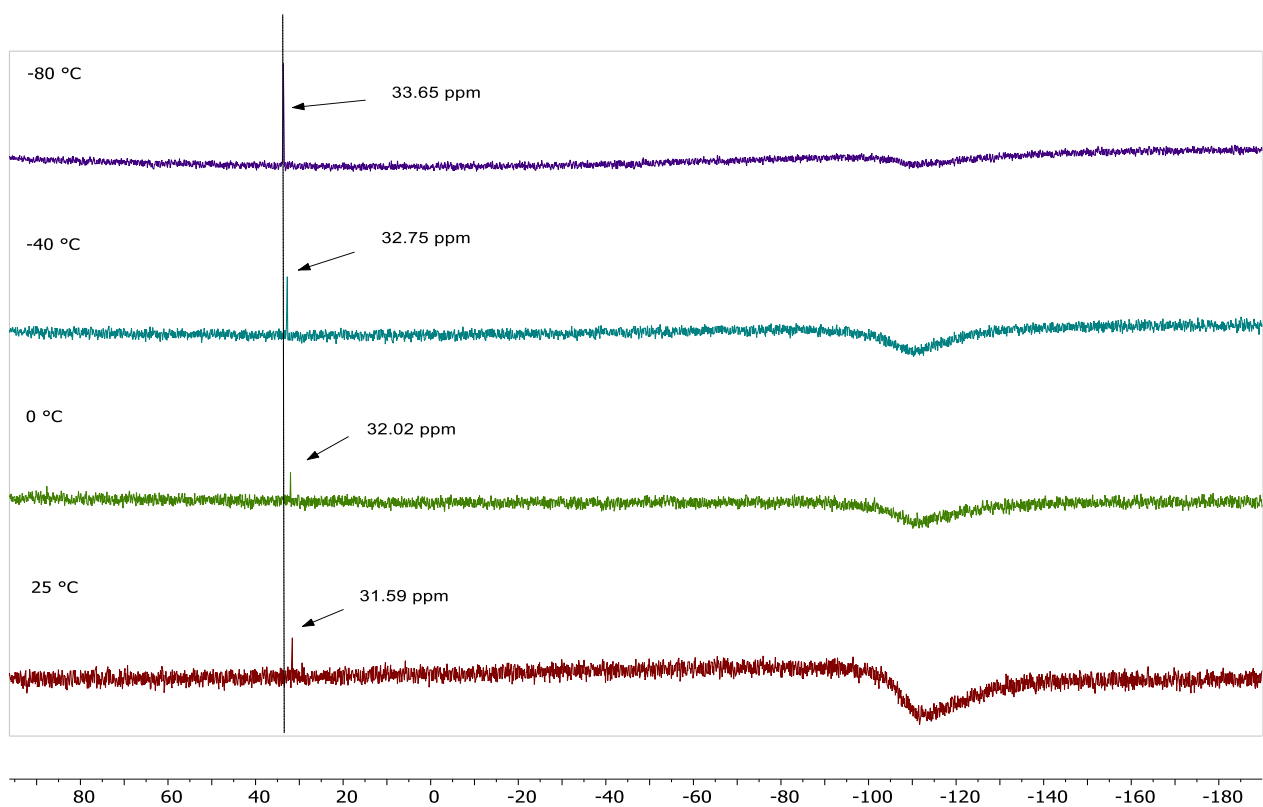

**Figure S 14:** Stacked  $^{29}\text{Si}\{^1\text{H}\}$  NMR spectra in  $\text{CD}_2\text{Cl}_2$  of freshly prepared **3** and **4** at a temperature range from  $-80\text{ }^\circ\text{C}$  to  $25\text{ }^\circ\text{C}$ .

### 2.2.5 Reaction of **1** with $\text{Et}_3\text{SiH}$ in presence of acetonitrile

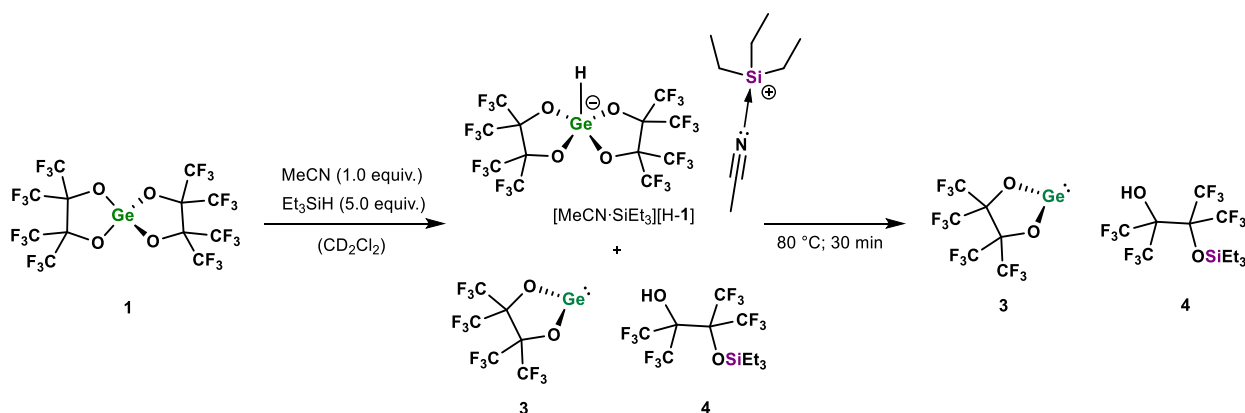

In a PTFE-sealed J-Young NMR tube was dissolved 15 mg (20.4  $\mu\text{mol}$ , 1.0 equiv.) **1** in 0.4 ml  $\text{CD}_2\text{Cl}_2$ . To the mixture were subsequently added 1.2  $\mu\text{l}$  (22.4  $\mu\text{mol}$ , 1.0 equiv.)  $\text{MeCN}$  and 3.6  $\mu\text{l}$   $\text{Et}_3\text{SiH}$ . The NMR tube was shaken vigorously and analyzed by multinuclear NMR spectroscopy. Afterwards, the product mixture was heated to  $80\text{ }^\circ\text{C}$  for 30 min and again analyzed.

The first NMR outlined the presence of the two main reaction products **3** (with by-product **4**) and  $[\text{MeCN}\cdot\text{SiEt}_3][\text{H-1}]$  in a molar ratio of 0.58/1.00 (referenced by integration of the Ge-H and OH signals). The second NMR (after heating) showed the selective formation of reaction product mixture **3** and **4**. No residual traces of ionic  $[\text{MeCN}\cdot\text{SiEt}_3][\text{H-1}]$  could be observed.

Note: The same results were obtained when  $\mathbf{1}\cdot\text{MeCN}$  was used instead of **1** and additional  $\text{MeCN}$ .

Observed product signals for **3** and **4**:

$^1\text{H-NMR}$  (400 MHz, dichloromethane- $d_2$ )  $\delta$  (ppm) = 4.04/4.07 (s, 1H, OH), 0.97 (t,  $^3J_{\text{H-H}} = 7.9\text{ Hz}$ , 9H,  $\text{CH}_3$ ), 0.80 (q,  $^3J_{\text{H-H}} = 8.0\text{ Hz}$ , 6H,  $\text{CH}_2$ ).

$^{19}\text{F-NMR}$  (377 MHz, dichloromethane- $d_2$ )  $\delta$  (ppm) = -69.06 – -69.20/-69.03 – -69.25 (m, 6F,  $\text{HO-CCF}_3$ ), -69.92 – -70.07/-69.90 – -70.11 (m, 6F,  $\text{SiO-CCF}_3$ ), -70.61/-70.55 (s, 12F,  $\text{Ge}(\text{OC}(\text{CF}_3)_2)_2$ ).

$^{29}\text{Si NMR}$  (99 MHz, dichloromethane- $d_2$ )  $\delta$  (ppm) = 31.61/31.53 (s, Si Et<sub>3</sub>).

Observed product signals of  $[\text{MeCN}\cdot\text{SiEt}_3][\text{H-1}]$ :

$^1\text{H-NMR}$  (400 MHz, dichloromethane- $d_2$ )  $\delta$  (ppm) = 6.50 (s, 1H, GeH), 2.28 (s, 3H,  $\text{CH}_3\text{CN}$ ), 1.14 – 1.02 (m, 15H,  $\text{CH}_2\text{CH}_3$ ).

$^{19}\text{F-NMR}$  (377 MHz, dichloromethane- $d_2$ )  $\delta$  (ppm) = -69.66 – -69.88 (m, 12F,  $\text{CF}_3$ ), -70.25 – -70.43 (m, 12F,  $\text{CF}_3$ ).

$^{29}\text{Si NMR}$  (99 MHz, dichloromethane- $d_2$ )  $\delta$  (ppm) = 40.38 (s, Si Et<sub>3</sub>).

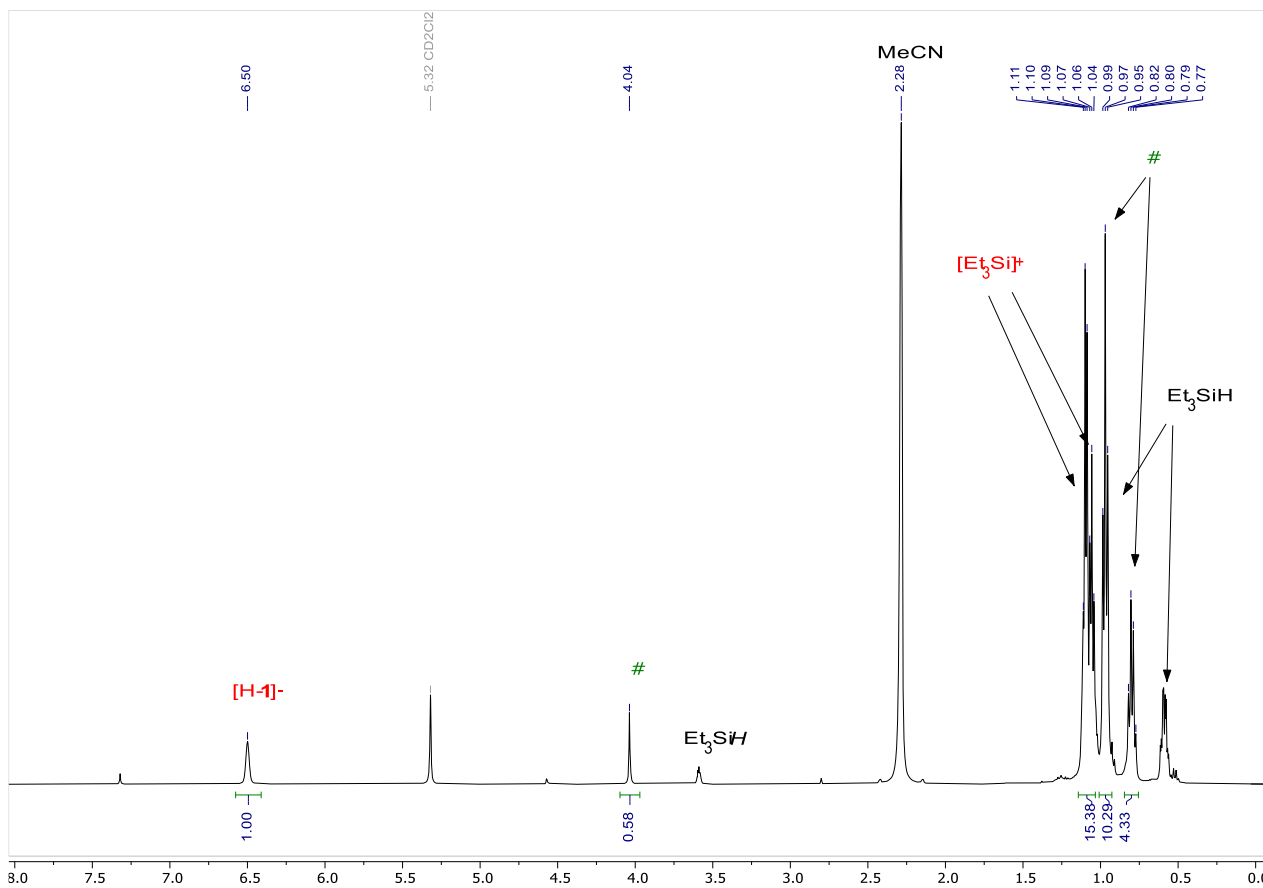

**Figure S 15:**  $^1\text{H}$  NMR spectrum of the reaction mixture after 10 minutes at room temperature in  $\text{CD}_2\text{Cl}_2$ , showing the formation of two main reaction products **4** (#) and  $[\text{MeCN}\cdot\text{SiEt}_3][\text{H-1}]$  with an integral ratio of 0.58/1.00 and residual/unreacted  $\text{Et}_3\text{SiH}$ .

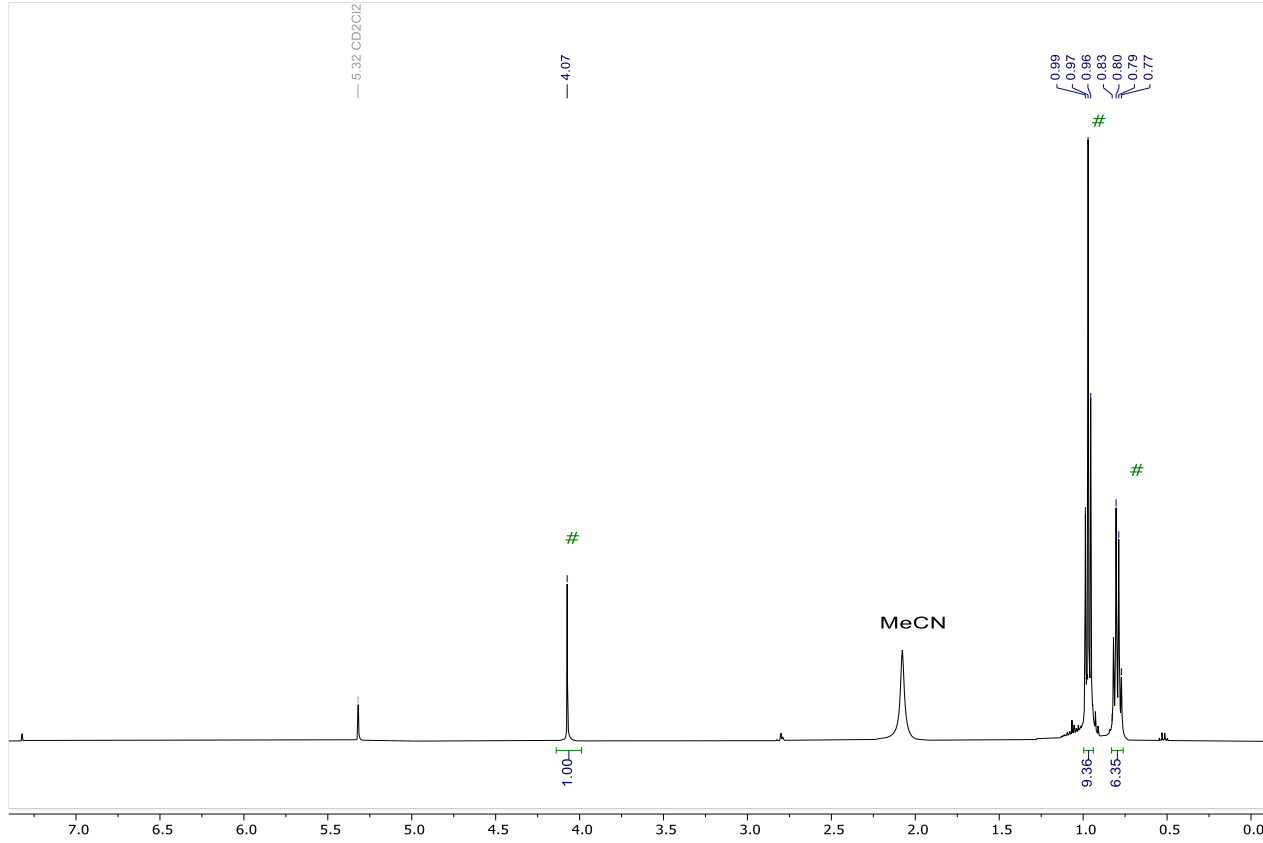

**Figure S 16:**  $^1\text{H}$  NMR spectrum of the reaction mixture after 30 minutes at 80 °C in  $\text{CD}_2\text{Cl}_2$ , showing the selective formation of **4** (#) as the main reaction product. No more  $[\text{MeCN}\cdot\text{SiEt}_3][\text{H-1}]$  can be observed.

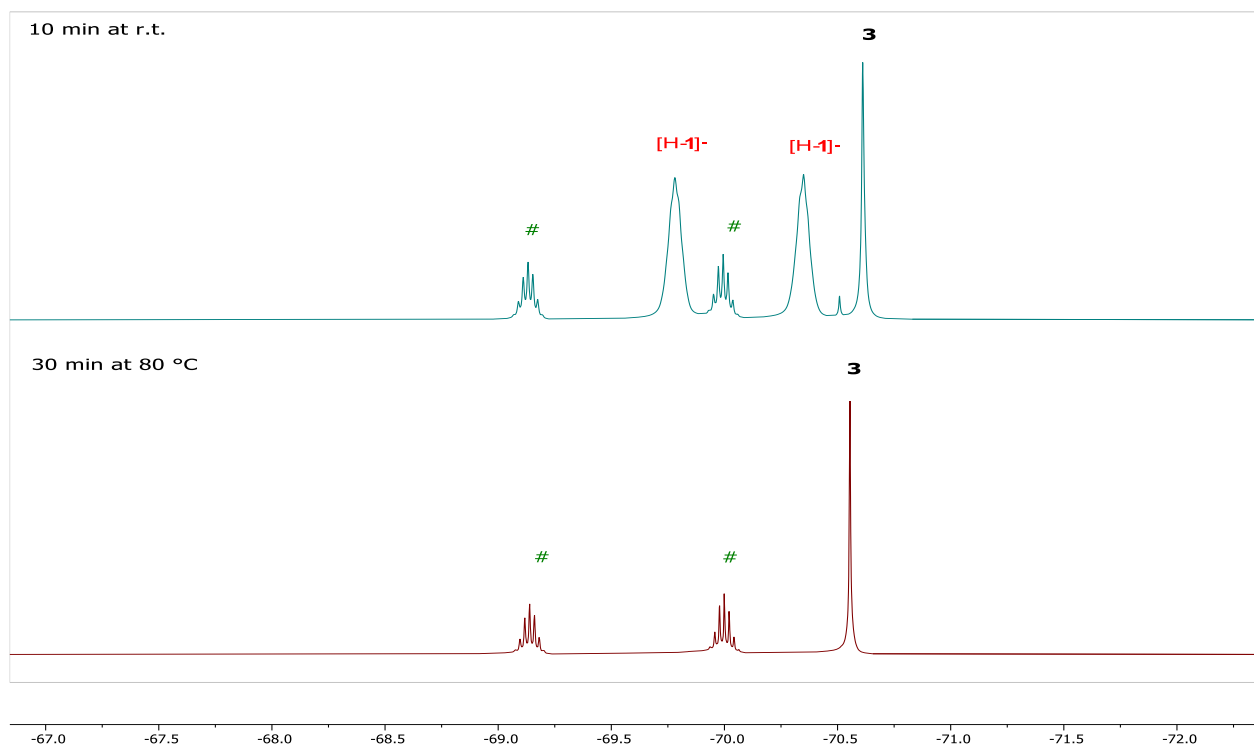

**Figure S 17:** Stacked  $^{19}\text{F}$  NMR spectra of the reaction mixture after 10 minutes at room temperature in  $\text{CD}_2\text{Cl}_2$ , showing the formation of two main reaction products **3**, **4**(#) and  $[\text{MeCN}\cdot\text{SiEt}_3][\text{H-1}]$  (top) and the selective conversion to towards **3** and **4** (#) after 30 min at 80 °C (bottom).

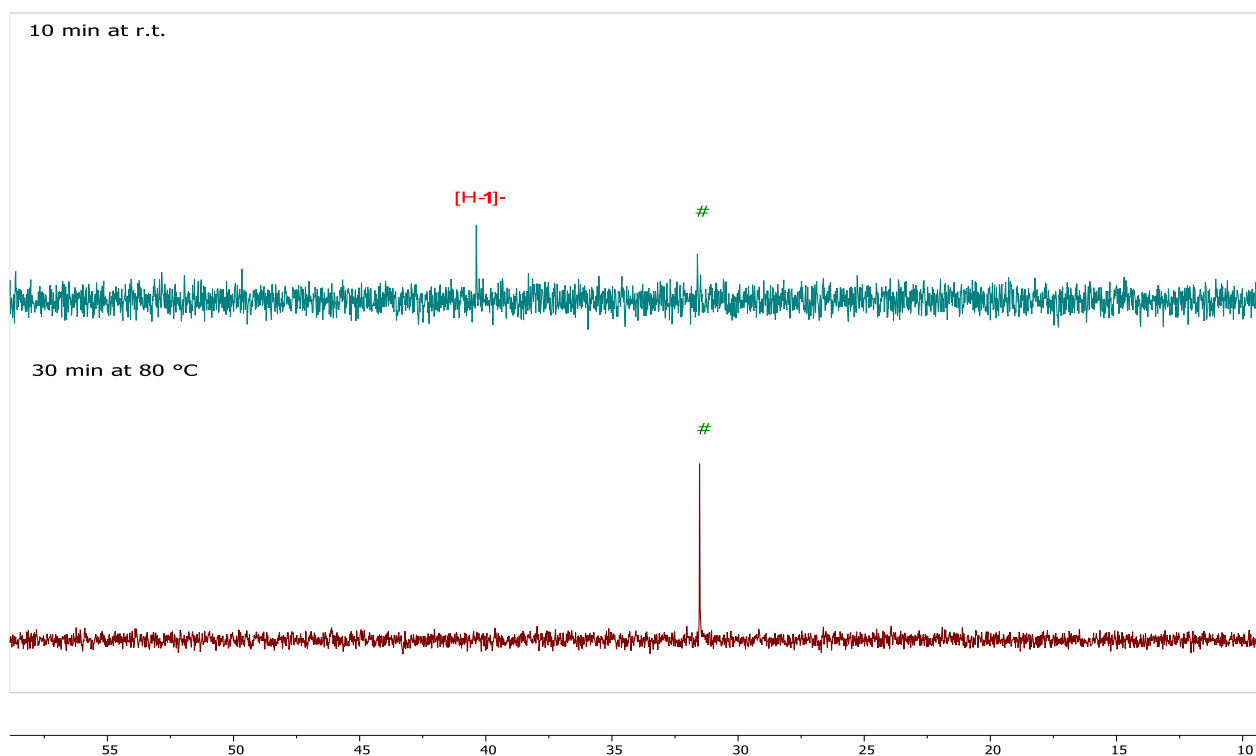

**Figure S 18:** Stacked  $^{29}\text{Si}\{^1\text{H}\}$  NMR spectra of the reaction mixture after 10 minutes at room temperature in  $\text{CD}_2\text{Cl}_2$ ,

showing the formation of two main reaction products **4** (#) and [MeCN·SiEt<sub>3</sub>][H-1] (top) and the selective conversion to **3** and **4** (#) after 30 min at 80 °C (bottom).

### 2.3.1 Dimerization of $\alpha$ -methylstyrene and 1,1-diphenylethylene

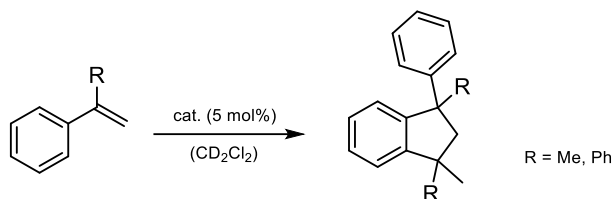

In a PTFE-sealed J-Young NMR tube was dissolved 15  $\mu$ l  $\alpha$ -methyl styrene or 15  $\mu$ l 1,1-diphenylethylene as well as 3  $\mu$ L of the internal standard mesitylene in 0.4 mL  $\text{CD}_2\text{Cl}_2$ . After zero-point measurements, 0.05 mol% of the respective catalyst were added and the NMR tube was vigorously shaken. The mixture was then analyzed by  $^1\text{H}$  NMR spectroscopy after 10 minutes at r.t. and several more intervals if necessary.

#### 1,1,3-Trimethyl-3-phenyl-2,3-dihydro-1H-indene (R = Me)

$^1\text{H}$  NMR (400 MHz,  $\text{CD}_2\text{Cl}_2$ )  $\delta$  (ppm) = 7.34 – 7.07 (m, 9H, ArH), 2.44(d,  $^2J_{\text{H-H}} = 13.1$  Hz, 1H, CHH), 2.22 (d,  $^1J_{\text{H-H}} = 13.1$  Hz, 1H, CHH), 1.69 (s, 3H,  $\text{CH}_3$ ), 1.36 (s, 3H,  $\text{CH}_3$ ), 1.05 (s, 3H,  $\text{CH}_3$ ).

$^{13}\text{C}$  NMR (101 MHz,  $\text{CD}_2\text{Cl}_2$ )  $\delta$  (ppm) = 152.69, 151.53, 149.24(ArC), 128.35, 127.09, 125.35, 122.96 (PhC), 59.54( $\text{CH}_2$ ), 51.19 (CMePh), 43.21 (CMe<sub>2</sub>), 31.17 ( $\text{CH}_3$ ), 30.89 ( $\text{CH}_3$ ), 30.50 ( $\text{CH}_3$ ).

#### 1-Methyl-1,3,3-triphenyl-2,3-dihydro-1H-indene (R = Ph)

$^1\text{H}$  NMR (400 MHz,  $\text{CD}_2\text{Cl}_2$ )  $\delta$  (ppm) = 7.36 – 7.01 (m, 19H, ArH), 3.41 (d,  $^2J_{\text{H-H}} = 13.5$  Hz, 1H, CHH), 3.14(d,  $^2J_{\text{H-H}} = 13.5$  Hz, 1H, CHH), 1.57 (s, 3H,  $\text{CH}_3$ ).

$^{13}\text{C}$  NMR (101 MHz,  $\text{CD}_2\text{Cl}_2$ )  $\delta$  (ppm) = 150.97, 149.81, 149.21, 149.08, 148.07 (ArC), 129.11, 129.07, 128.36, 128.23, 127.98, 127.86, 127.22, 126.40, 126.06, 125.95, 125.49 (PhC), 61.49 ( $\text{CH}_2$ ), 61.33 (CPh<sub>2</sub>), 51.57 (CMePh), 29.28 ( $\text{CH}_3$ ).

Product signals correspond with pattern given in the literature.<sup>[14]</sup>

**Table S 1:** Reaction conditions and conversion and yield of dimerization experiments after several hours at room temperature. Product yield and conversion of reactants were calculated by integration with respect to the internal standard.

| Sample | Reagent                  | Catalyst       | Temp. [°C] | Time   | Conversion [%] | Yield [%] |
|--------|--------------------------|----------------|------------|--------|----------------|-----------|
| I      | $\alpha$ -methyl styrene | <b>1</b>       | 25         | 10 min | 99             | 65        |
| II     | $\alpha$ -methyl styrene | <b>1</b> ·MeCN | 25         | 10 min | 99             | 83        |
| III    | 1,1-diphenylethylene     | <b>1</b>       | 25         | 1 h    | 99             | 99        |
| IV     | 1,1-diphenylethylene     | <b>1</b> ·MeCN | 25         | 10 min | 75             | 70        |
| IV     | 1,1-diphenylethylene     | <b>1</b> ·MeCN | 25         | 5 h    | 94             | 88        |
| IV     | 1,1-diphenylethylene     | <b>1</b> ·MeCN | 25         | 48 h   | 99             | 98        |

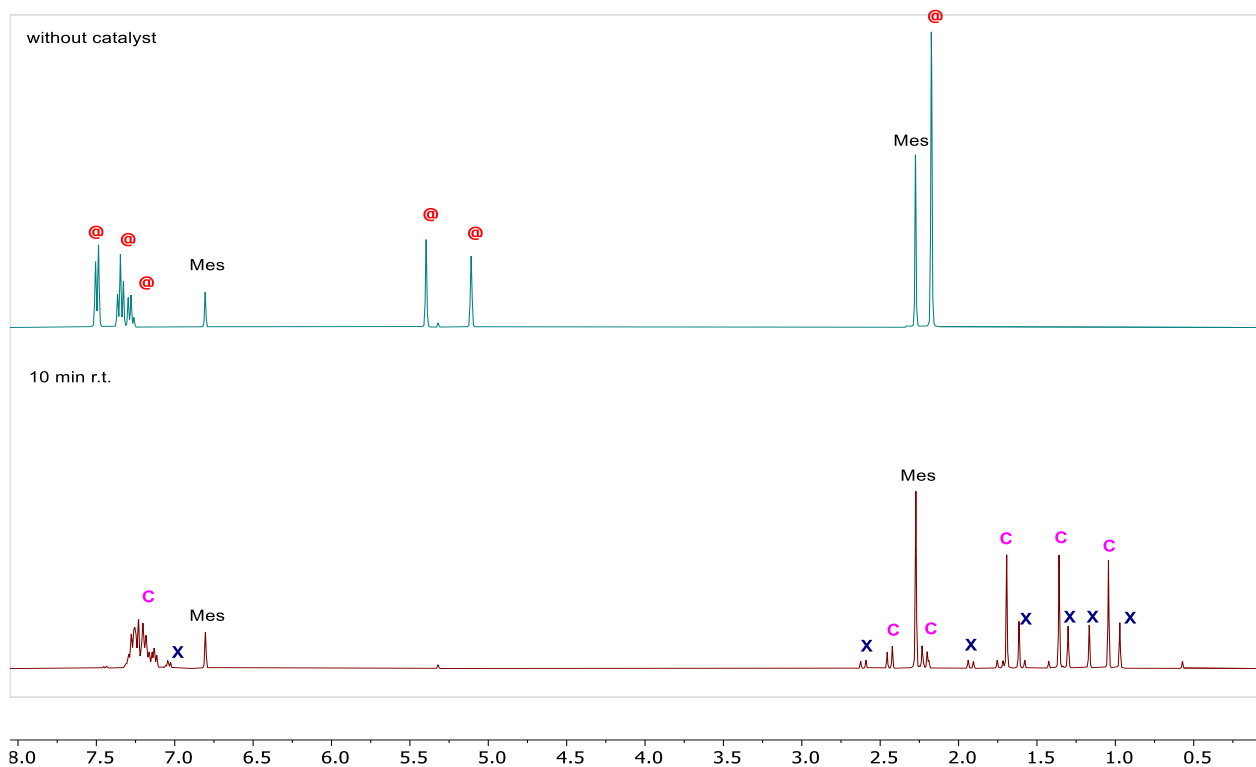

**Figure S 19:** Stacked  $^1\text{H}$  NMR spectra in  $\text{CD}_2\text{Cl}_2$  of the dimerization experiment of  $\alpha$ -methyl styrene (@) using **1** as catalyst. After 10 min full conversion was obtained showing giving the dimer (**C**) as the main reaction product as well as minor amounts of trimeric side product (**X**).<sup>[15]</sup>

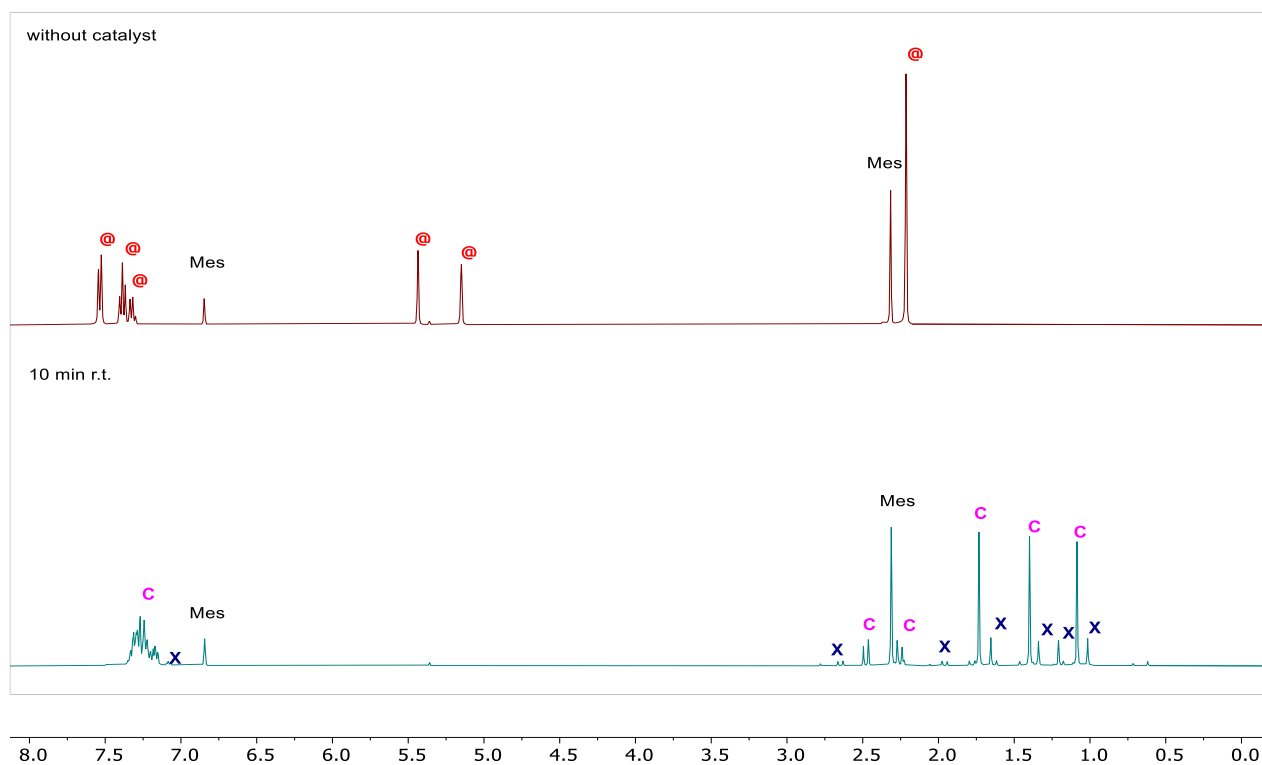

**Figure S 20:** Stacked  $^1\text{H}$  NMR spectra in  $\text{CD}_2\text{Cl}_2$  of the dimerization experiment of  $\alpha$ -methyl styrene (@) using **1**-MeCN as catalyst. After 10 min full conversion was obtained showing giving the dimer (**C**) as the main reaction product as well as minor amounts of trimeric side product (**X**).<sup>[15]</sup>



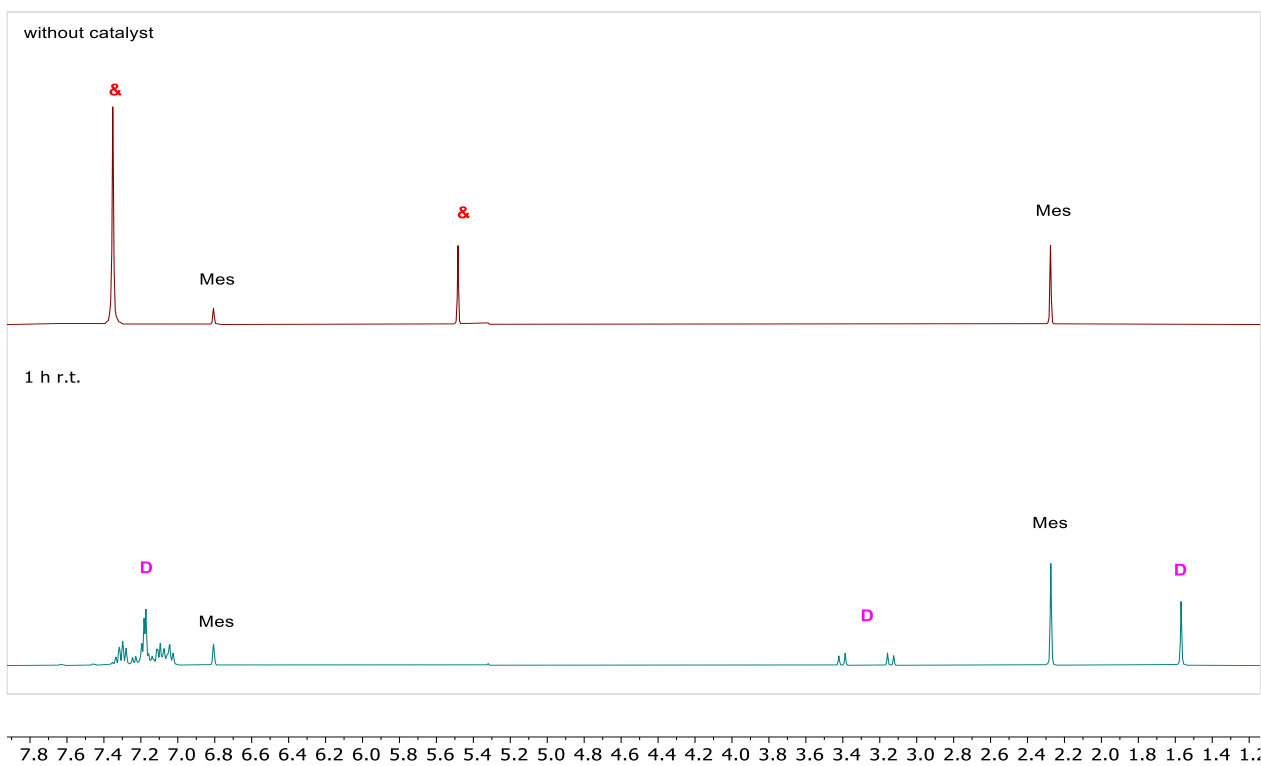

**Figure S 21:** Stacked  $^1\text{H}$  NMR spectra in  $\text{CD}_2\text{Cl}_2$  of the dimerization experiment of 1,1-diphenylethylene (**&**) using **1** as catalyst. After 10 min full conversion was obtained selectively yielding the dimerization product (**D**).

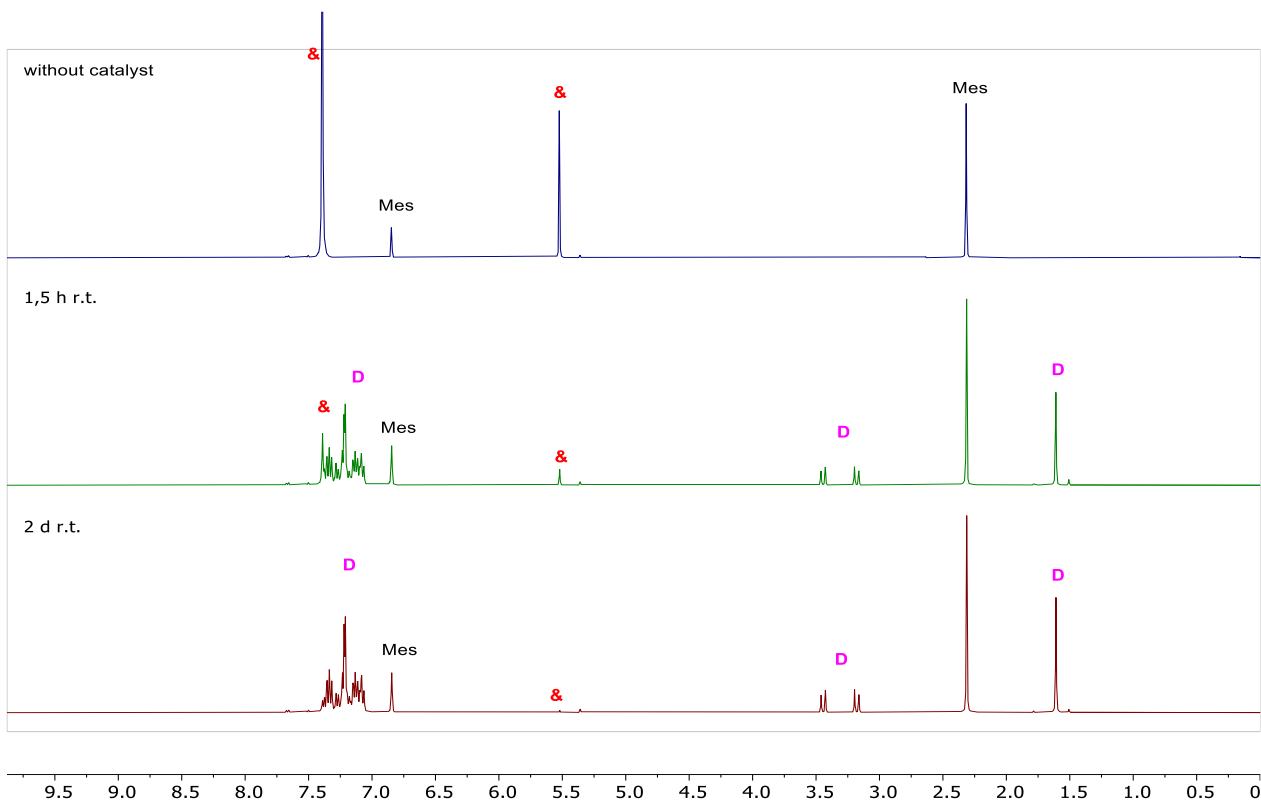

**Figure S 22:** Stacked  $^1\text{H}$  NMR spectra in  $\text{CD}_2\text{Cl}_2$  of the dimerization experiment of 1,1-diphenylethylene (**&**) using **1**·MeCN as catalyst. After 2 days at room temperature nearly quantitative conversion was obtained selectively yielding the dimerization product (**D**).

### 2.3.2 Hydrosilylation of $\alpha$ -methylstyrene

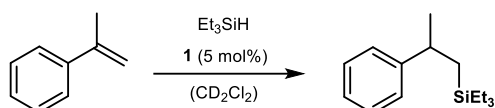

To a solution 3.70 mg (500  $\mu\text{mol}$ , 0.05 equiv.) **1** in 0.4 ml  $\text{CD}_2\text{Cl}_2$  were added 16  $\mu\text{l}$  (100 mmol, 1.00 equiv.)  $\text{Et}_3\text{SiH}$  in a PTFE-sealed J-Young NMR tube. After complete dissolution 13.0  $\mu\text{l}$  (100 mmol, 1.00 equiv.)  $\alpha$ -methylstyrene and the internal standard mesitylene (3.00  $\mu\text{l}$ ) was added. The reaction mixture was analyzed by  $^1\text{H}$  NMR spectroscopy after several periods at defined temperatures.

Triethyl(2-phenylpropyl)silane:

$^1\text{H}$  NMR (400 MHz,  $\text{CD}_2\text{Cl}_2$ )  $\delta$  (ppm) = 7.32 – 7.21 (m, 4H, *o,m*-CH), 7.20 – 7.10 (m, 1H, *p*-CH), 2.96 – 2.83 (m, 1H, PhCHCH $_3$ ), 1.29 (d,  $^3J_{\text{H-H}} = 6.9$  Hz, 3H, PhCHCH $_3$ ), 0.97 (dd,  $^1J_{\text{H-H}} = 17.2$ ,  $^3J_{\text{H-H}} = 7.5$  Hz, 2H, CH(CH $_3$ )CH $_2$ ), 0.90 (t,  $^3J_{\text{H-H}} = 7.9$  Hz, 9H, SiCH $_2$ CH $_3$ ), 0.54 – 0.35 (m, 6H, SiCH $_2$ CH $_3$ ).

$^{13}\text{C}$  NMR (101 MHz,  $\text{CD}_2\text{Cl}_2$ )  $\delta$  (ppm) = 150.75 (C), 128.64(*o,m*-CH), 127.04(*o,m*-CH), 126.09 (*p*-CH), 36.60 (CH), 26.82 (CH $_3$ ), 21.92 (CH $_2$ ), 7.62 (SiCH $_2$ CH $_3$ ), 4.09 (SiCH $_2$ CH $_3$ ).

Product signals corresponds to separately synthesized triethyl(2-phenylpropyl)silane and NMR signals given in the literature.<sup>[16]</sup>

**Table S 2:** Reaction conditions and yield hydrosilylation experiments several hours at various temperatures. Product yield was calculated by integration of the PhCHCH $_3$ -Signal with respect to the internal standard.

| Sample | Temp. [ $^{\circ}\text{C}$ ] | Time [h] | Conversion [%] | Yield [%] |
|--------|------------------------------|----------|----------------|-----------|
| I      | 25                           | 24       | 28             | 26        |
| I      | 25                           | 72       | 33             | 31        |
| I      | 25                           | 216      | 69             | 65        |
| I      | 25                           | 336      | 95             | 89        |
| II     | -35                          | 18       | 98             | 96        |

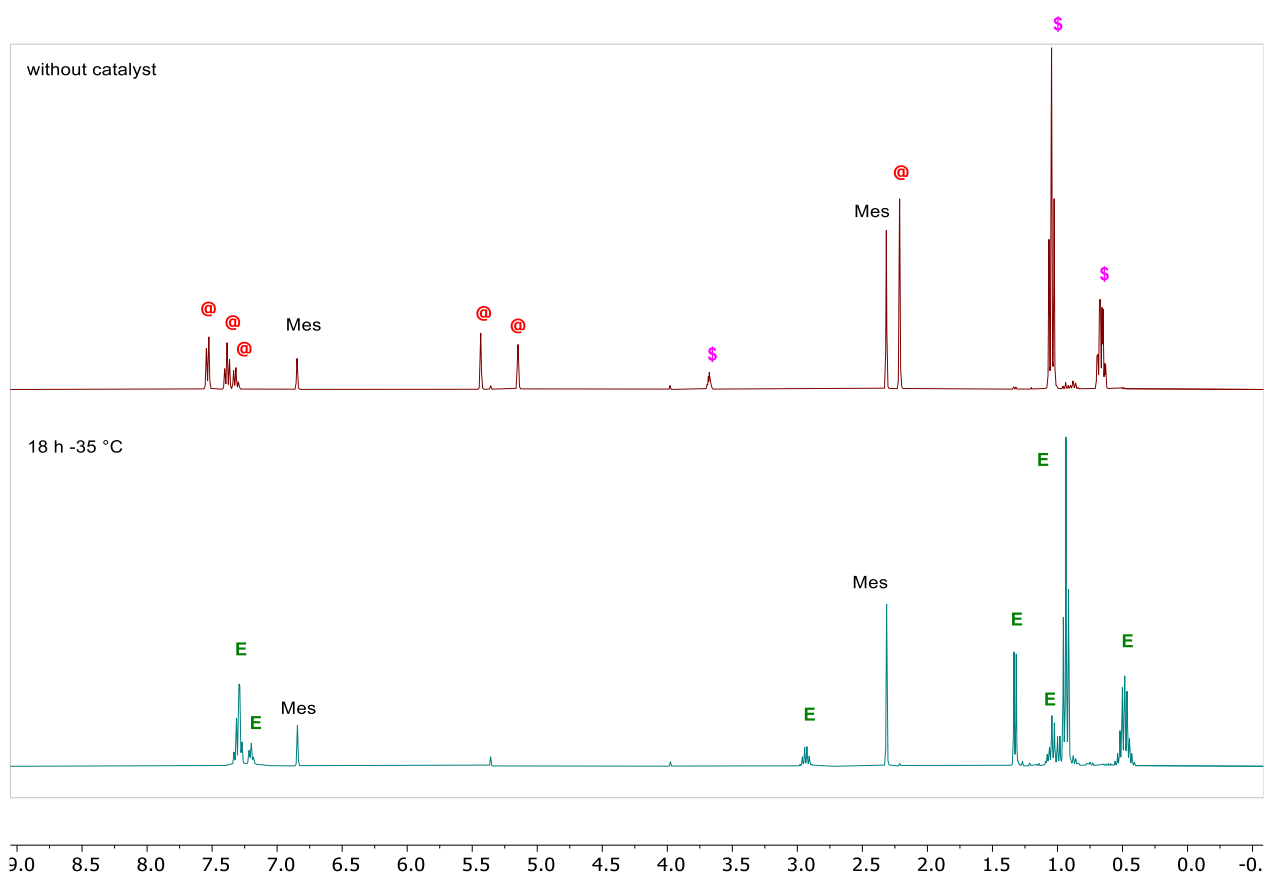

**Figure S 23:** Stacked  $^1\text{H}$  NMR spectra in  $\text{CD}_2\text{Cl}_2$  of sample **II** after 18 hours at  $-35\text{ }^\circ\text{C}$ , showing complete conversion, selectively forming the hydrosilylation product (**E**) from  $\alpha$ -methylstyrene (@) and  $\text{Et}_3\text{SiH}$  (\$).

### Tracing the reaction progress

To additionally monitor the reaction progress, an equal NMR sample as described above was placed in a cooled NMR probe head at  $-44.3\text{ }^\circ\text{C}$  (displayed value:  $-50\text{ }^\circ\text{C}$ ) and measured over the course of 12 hours. The obtained reaction progress is displayed in Table S 3.

**Table S 3:** Reaction progress of a freshly prepared sample at  $-44.3\text{ }^\circ\text{C}$ . Conversion and product yield was calculated by integration of the  $\text{Et}_3\text{SiH}$ - and  $\text{PhCHCH}_3$  signals with respect to the internal standard.

| Time [min] | Conversion [%] | Yield [%] |
|------------|----------------|-----------|
| <b>1</b>   | 19             | 17        |
| <b>2</b>   | 30             | 29        |
| <b>3</b>   | 41             | 39        |
| <b>4</b>   | 49             | 47        |
| <b>6</b>   | 59             | 59        |
| <b>9</b>   | 72             | 71        |
| <b>12</b>  | 78             | 77        |

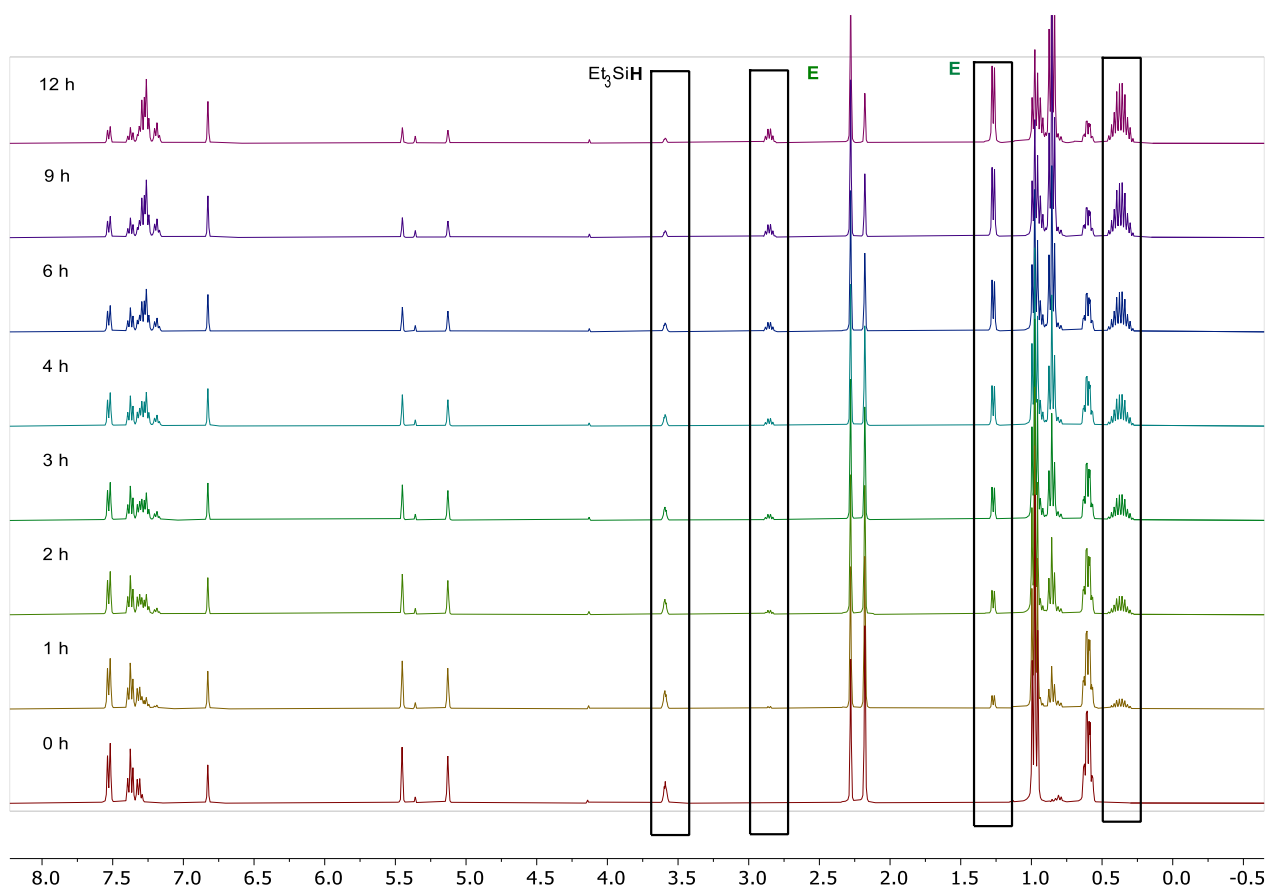

**Figure S 24:** Stacked  $^1\text{H}$  NMR spectra in  $\text{CD}_2\text{Cl}_2$  of a freshly prepared hydrosilylation experiment after several hours at  $-44.3\text{ }^\circ\text{C}$ . Selected reactant ( $\text{Et}_3\text{SiH}$ ) and product (**E**) signals are highlighted by dashed frames.

### 2.3.3 Stoichiometric hydrosilylation of methylstyrene with $\text{Et}_3\text{SiH}$

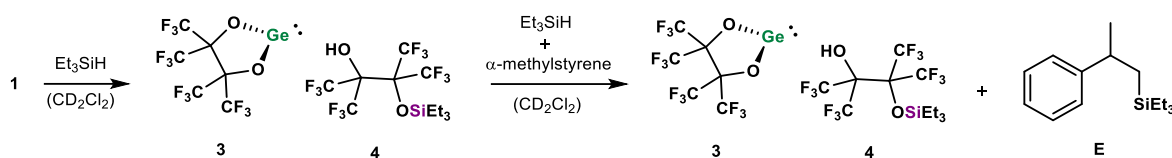

In this stoichiometric experiment compound **1** (6.00 mg, 8.14  $\mu\text{mol}$ , 1.00 equiv.) was reacted with  $\text{Et}_3\text{SiH}$  (1.30  $\mu\text{l}$ , 8.14  $\mu\text{mol}$ , 1.00 equiv.) in 0.4 ml  $\text{CD}_2\text{Cl}_2$  to selectively form hydrosilane activation products **3** and **4**. Afterwards another equivalent of  $\text{Et}_3\text{SiH}$  (1.30  $\mu\text{l}$ , 8.14  $\mu\text{mol}$ , 1.00 equiv.) and one equivalent of  $\alpha$ -methylstyrene (1.06 ml, 8.14  $\mu\text{mol}$ , 1.00 equiv.) were added. The mixture was analysed after 15 min at room temperature and then stored for 18 h at  $-36\text{ }^\circ\text{C}$ . Multinuclear NMR analysis revealed the quantitative formation of hydrosilylation product **E**. The initially formed germylene species **3** as well as the silylated alcohol **4** stayed intact during this experiment, which could be observed by  $^{19}\text{F}$  NMR spectroscopy.

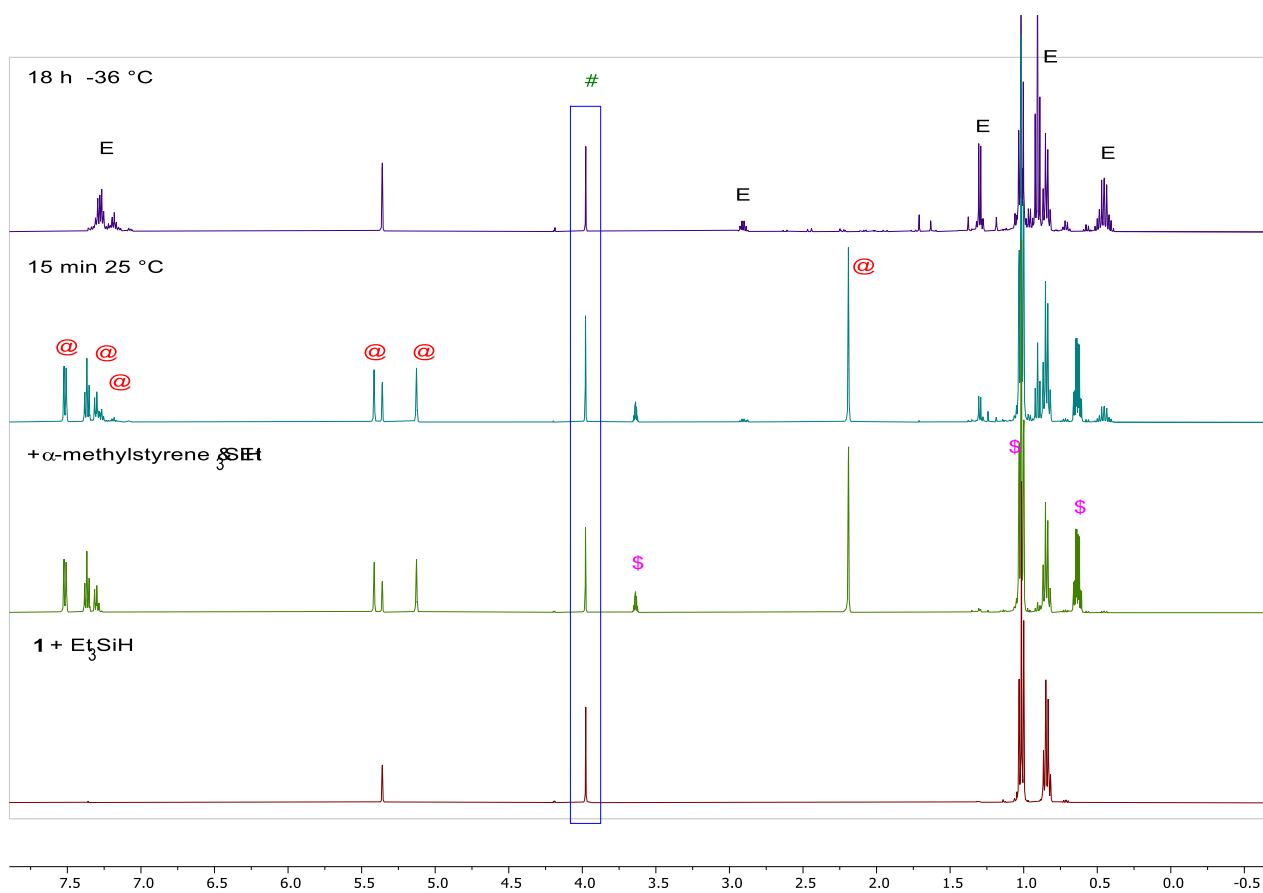

**Figure S 25:** Stacked  $^1\text{H}$  NMR spectra of stepwise hydrosilylation experiment in  $\text{CD}_2\text{Cl}_2$ . The experiments showed the selective formation of the product mixture containing **4** (#), which stayed intact over the course the catalytic reaction.  $\text{Et}_3\text{SiH}$  (\$) and  $\alpha$ -methylstyrene (@) were fully converted to hydrosilylation product **E**.

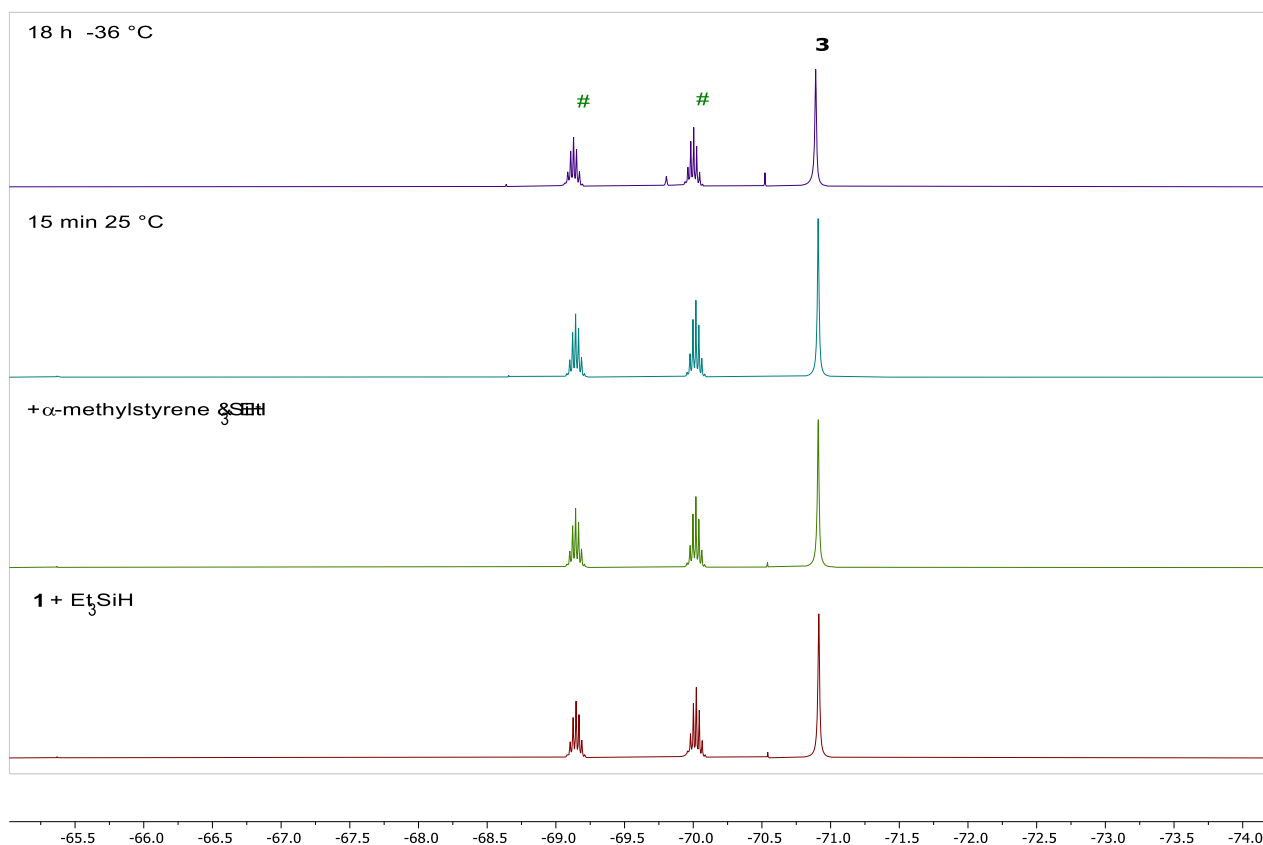

**Figure S 26:** Stacked  $^{19}\text{F}$  NMR spectra of stepwise hydrosilylation experiment in  $\text{CD}_2\text{Cl}_2$ . No change of the germylene species **3** and triethylsilyl perfluoropinacol **4** (#) is observed over the course of the reaction.

### 2.3.4 Hydrosilylation of $\alpha$ -methylstyrene with mixed silanes ( $i\text{Pr}_3\text{SiH}$ vs $\text{Et}_3\text{SiH}$ )

#### Initiation with $i\text{Pr}_3\text{SiH}$

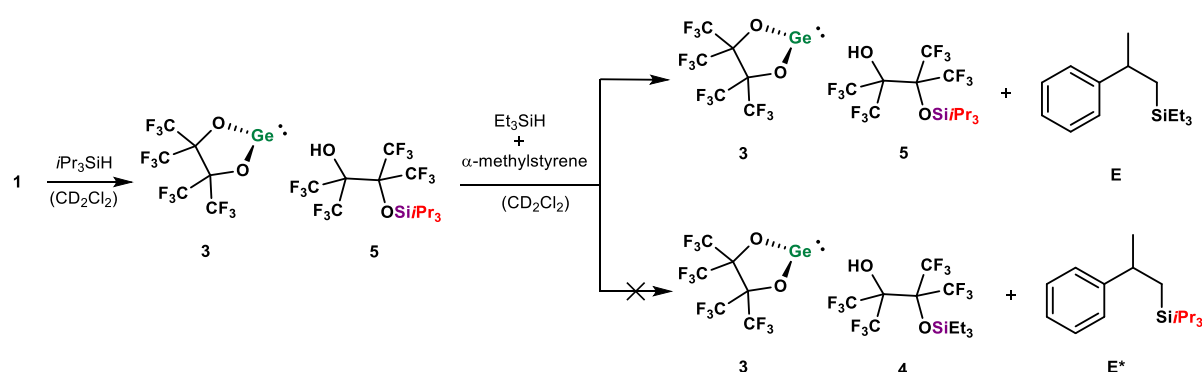

In a first experiment **1** (6.00 mg, 8.14  $\mu\text{mol}$ , 1.00 equiv.) was reacted with  $i\text{Pr}_3\text{SiH}$  (1.67  $\mu\text{l}$ , 8.14  $\mu\text{mol}$ , 1.00 equiv.) in 0.4 ml  $\text{CD}_2\text{Cl}_2$  to generate the hydrosilane activation products **3** and  $\text{Hpin}^F\text{SiPr}_3$ . Full conversion but less selective product formation, when compared to  $\text{Et}_3\text{SiH}$ , was confirmed by NMR analysis. Afterwards  $\text{Et}_3\text{SiH}$  (1.30  $\mu\text{l}$ , 8.14  $\mu\text{mol}$ , 1.00 equiv.) and  $\alpha$ -methylstyrene (1.06 ml, 8.14  $\mu\text{mol}$ , 1.00 equiv.) were added and the mixture was stored for 18 h at  $-36^\circ\text{C}$ . Subsequent multinuclear NMR analysis revealed the quantitative formation of hydrosilylationproduct **E**. The formation of **E\*** was not observed. The catalyst mixture stayed intact as no change could be observed within the  $^{19}\text{F}$  NMR spectrum.

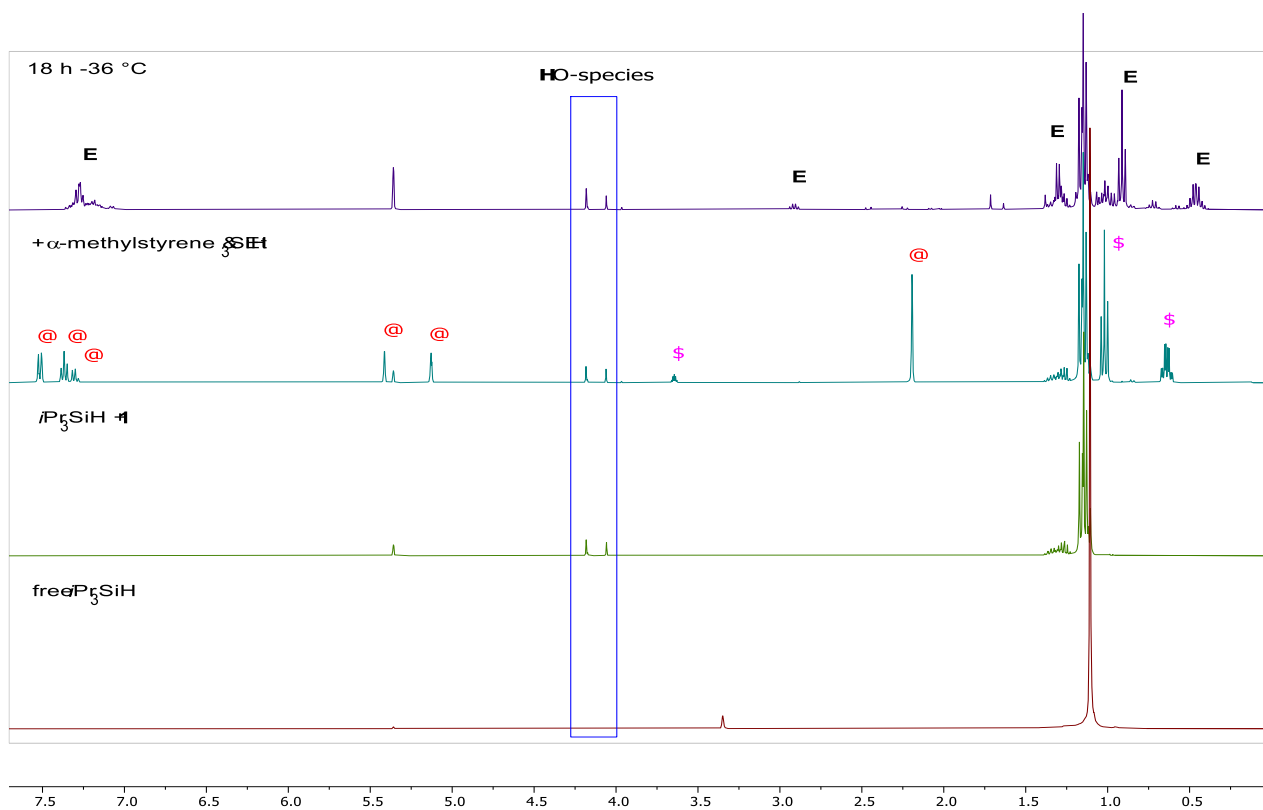

**Figure S 27:** Stacked  $^1\text{H}$  NMR spectra of stepwise hydrosilylation experiment in  $\text{CD}_2\text{Cl}_2$  selectively forming product **E**. The experiments initiated with the addition of  $i\text{Pr}_3\text{SiH}$ , followed by  $\text{Et}_3\text{SiH}$  (\$) and  $\alpha$ -methylstyrene (@). The formation of two alcohol species is observed after  $i\text{Pr}_3\text{SiH}$  addition.

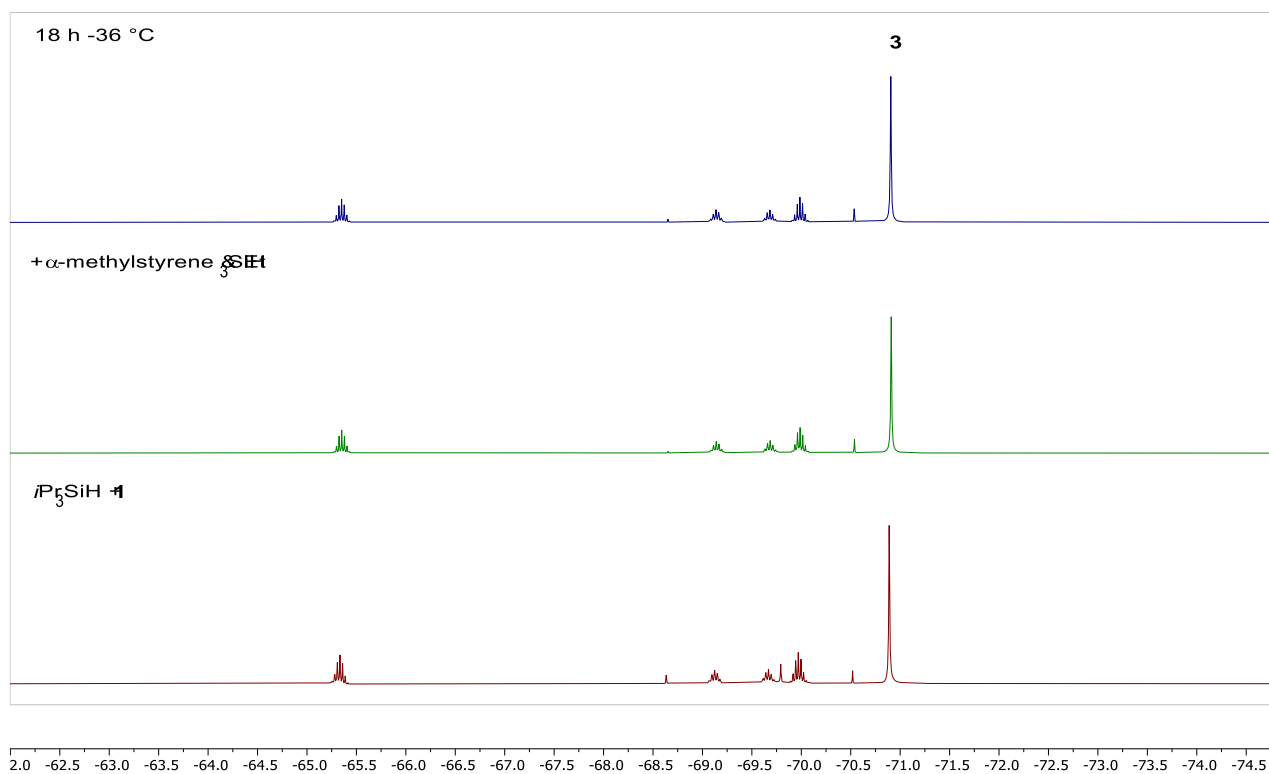

**Figure S 28:** Stacked  $^{19}\text{F}$  NMR spectra of stepwise hydrosilylation experiment in  $\text{CD}_2\text{Cl}_2$ . No change of the germylene species **3** is observed after reactant addition and after full conversion.

## Initiation with Et<sub>3</sub>SiH

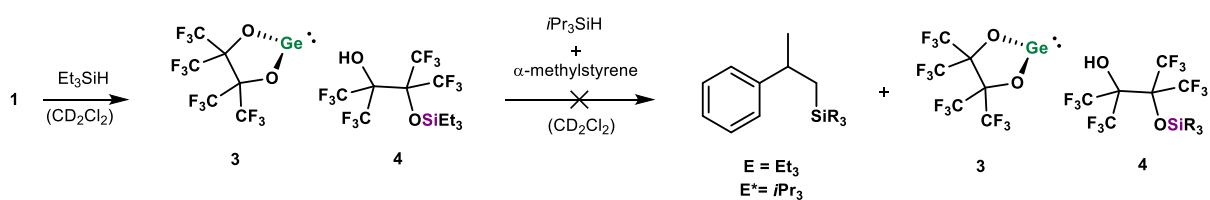

In this experiment **1** (6.00 mg, 8.14  $\mu\text{mol}$ , 1.00 equiv.) was reacted with Et<sub>3</sub>SiH (1.30  $\mu\text{l}$ , 8.14  $\mu\text{mol}$ , 1.00 equiv.) in 0.4 ml CD<sub>2</sub>Cl<sub>2</sub> to generate the hydrosilane activation product **3** and **4**. Afterwards *i*Pr<sub>3</sub>SiH (1.67  $\mu\text{l}$ , 8.14  $\mu\text{mol}$ , 1.00 equiv.) and  $\alpha$ -methylstyrene (1.06 ml, 8.14  $\mu\text{mol}$ , 1.00 equiv.) were added and the mixture was stored for 18 h at -36 °C. Subsequent multinuclear NMR analysis revealed the quantitative conversion of  $\alpha$ -methylstyrene but no hydrosilylation product could be identified. An ill-defined product mixture containing various dimerization products was obtained.

### 2.3.5 Hydrosilylation of $\alpha$ -methylstyrene with isotopically marked Et<sub>3</sub>SiD

#### Initiation with Et<sub>3</sub>SiD

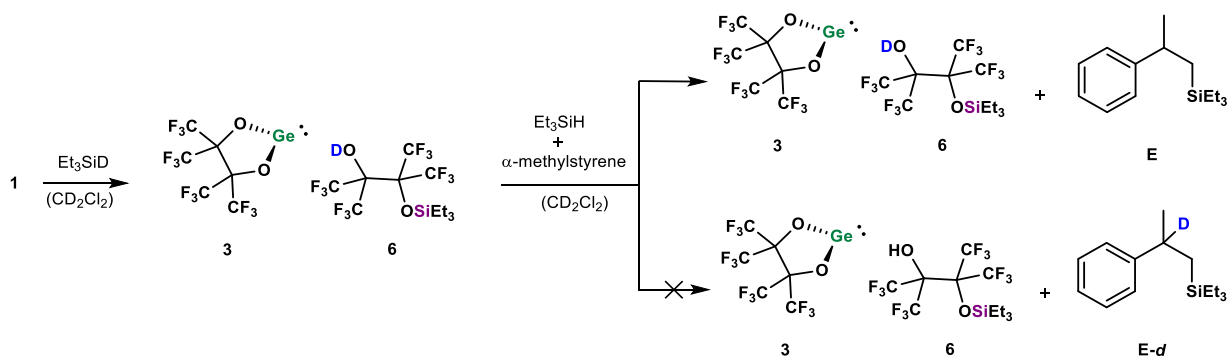

Here **1** (6.00 mg, 8.14  $\mu\text{mol}$ , 1.00 equiv.) was reacted with Et<sub>3</sub>SiD (1.67  $\mu\text{l}$ , 8.14  $\mu\text{mol}$ , 1.00 equiv.) in 0.4 ml CD<sub>2</sub>Cl<sub>2</sub> to generate **3** and deuterated Dpin<sup>F</sup>SiEt<sub>3</sub>. Full conversion was confirmed by NMR analysis. Afterwards Et<sub>3</sub>SiH (1.30  $\mu\text{l}$ , 8.14  $\mu\text{mol}$ , 1.00 equiv.) and  $\alpha$ -methylstyrene (1.06 ml, 8.14  $\mu\text{mol}$ , 1.00 equiv.) were added and the mixture was stored for 18 h at -36 °C. NMR analysis revealed the quantitative formation of hydrosilylation product **E** while both **3** and **6** stayed intact. The formation of deuterated **E-d** was not observed.



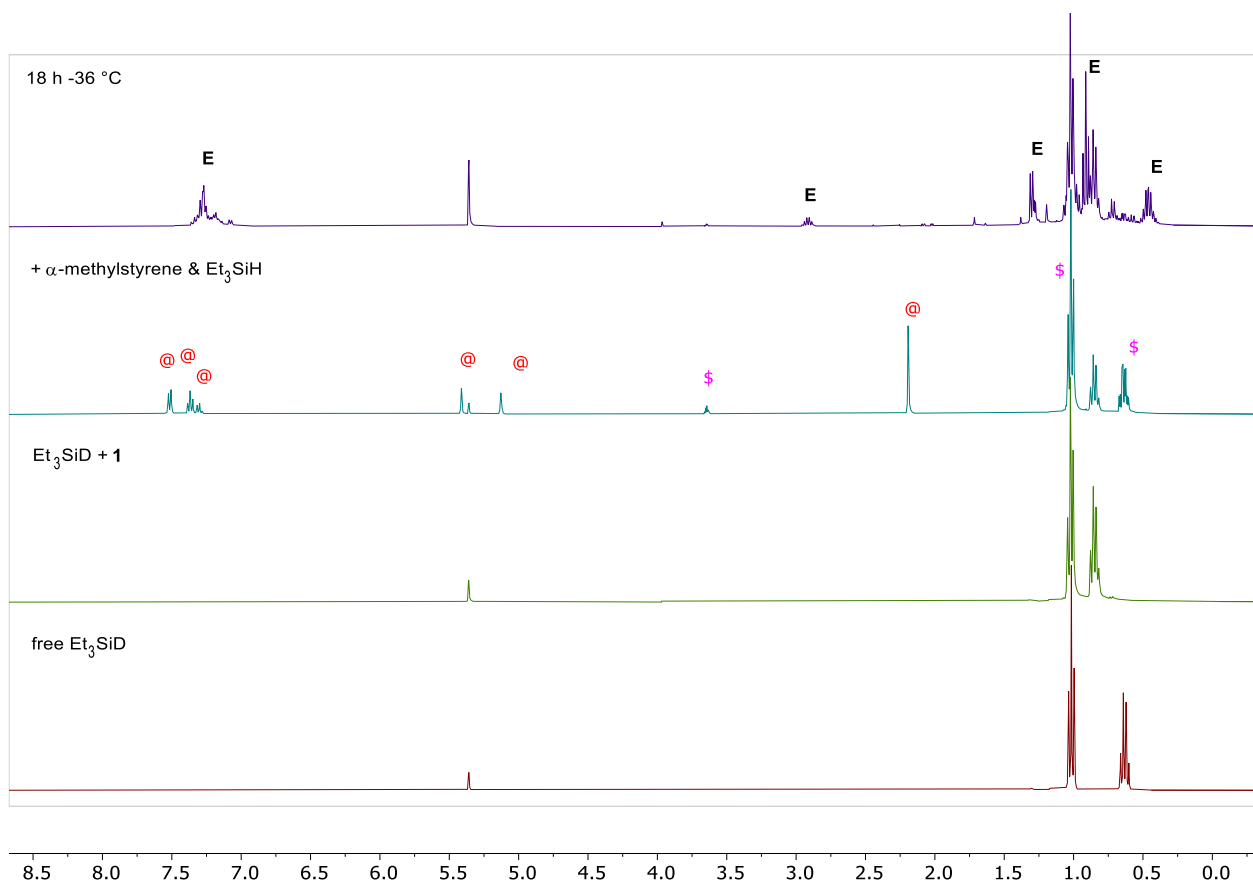

**Figure S 29:** Stacked <sup>1</sup>H NMR spectra of stoichiometric hydrosilylation experiment with isotopically marked Et<sub>3</sub>SiD in CD<sub>2</sub>Cl<sub>2</sub> selectively forming product **E**. The spectra additionally show reactants Et<sub>3</sub>SiH (\$) and  $\alpha$ -methylstyrene (@) directly after the addition. No formation of the Ge-H species or potential reaction product **E-d** was observed.

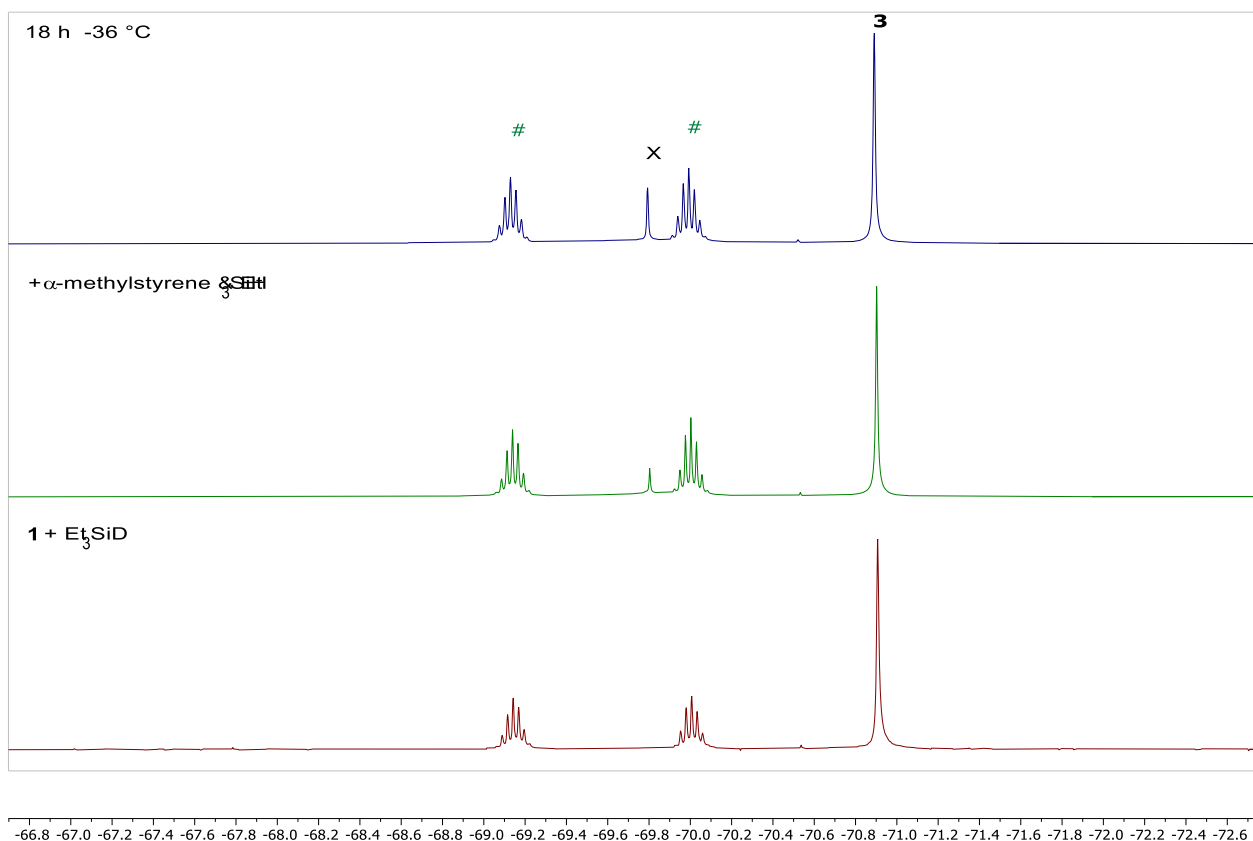

**Figure S 30:** Stacked  $^{19}\text{F}$  NMR spectra of stoichiometric hydrosilylation experiment with  $\text{Et}_3\text{SiD}$  in  $\text{CD}_2\text{Cl}_2$ . The formation of an undefined side product **X** is observed while the germylene species **3** and **6** (#) stayed intact.

### Initiation with $\text{Et}_3\text{SiH}$

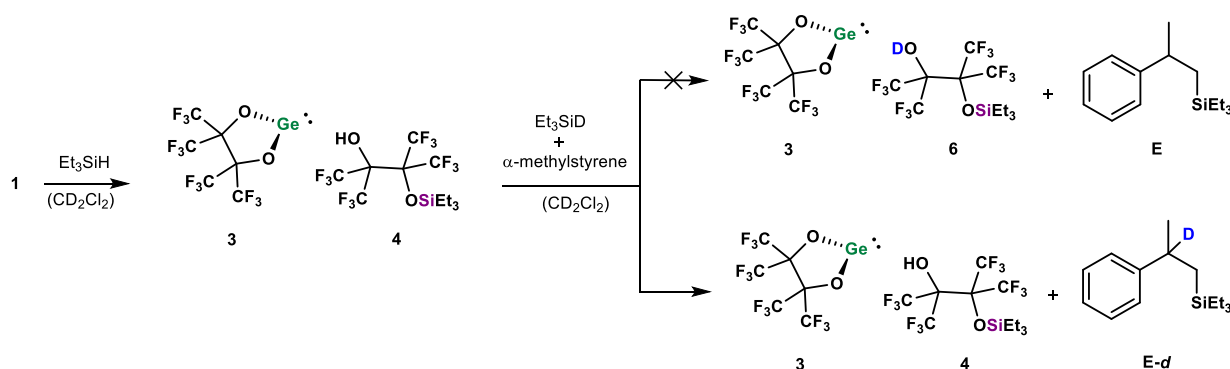

To double check the obtained results **1** (6.00 mg, 8.14  $\mu\text{mol}$ , 1.00 equiv.) was reacted with non-deuterated  $\text{Et}_3\text{SiH}$  (1.67  $\mu\text{l}$ , 8.14  $\mu\text{mol}$ , 1.00 equiv.) in 0.4 ml  $\text{CD}_2\text{Cl}_2$  to generate perfluoropinacolgermylene **3** and triethylsilyl perfluoropinacol **4**. Full conversion was confirmed by NMR analysis. Afterwards deuterated  $\text{Et}_3\text{SiD}$  (1.30  $\mu\text{l}$ , 8.14  $\mu\text{mol}$ , 1.00 equiv.) and  $\alpha$ -methylstyrene (1.06 ml, 8.14  $\mu\text{mol}$ , 1.00 equiv.) were added and the mixture was stored for 18 h at  $-36^\circ\text{C}$ . NMR analysis revealed the quantitative formation of hydrosilylationproduct **E-d** while catalyst **3** and **4** stayed intact. This time, no formation of non-deuterated **E** was observed.

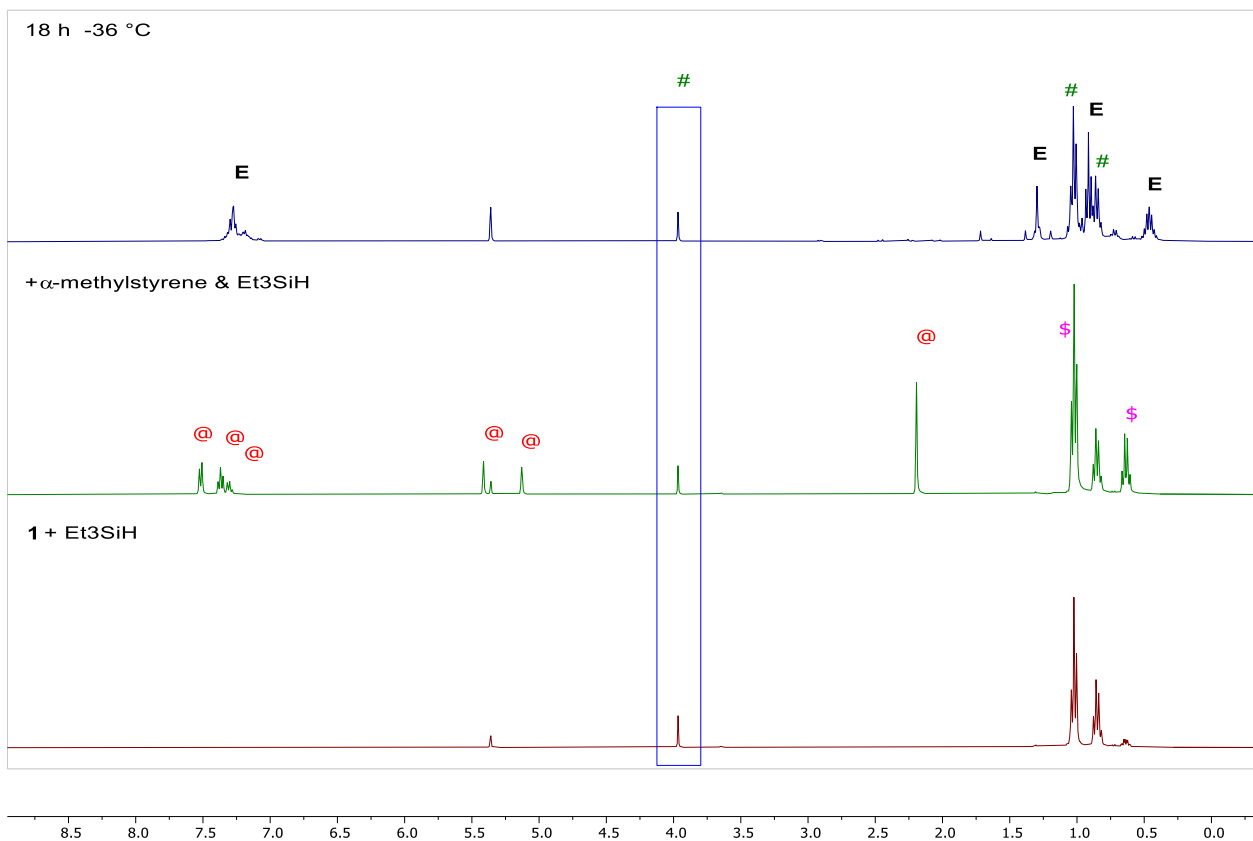

**Figure S 31:** Stacked <sup>1</sup>H NMR spectra of stoichiometric hydrosilylation experiment with Et<sub>3</sub>SiD (initiating with Et<sub>3</sub>SiH addition) in CD<sub>2</sub>Cl<sub>2</sub> selectively forming hydrosilylation product **E-d**. The spectra additionally contain reactants isotopically marked Et<sub>3</sub>SiD (\$) and  $\alpha$ -methylstyrene (@) directly after the addition. No conversion of **4** (#) species or formation of reaction product **E** was observed in this case.

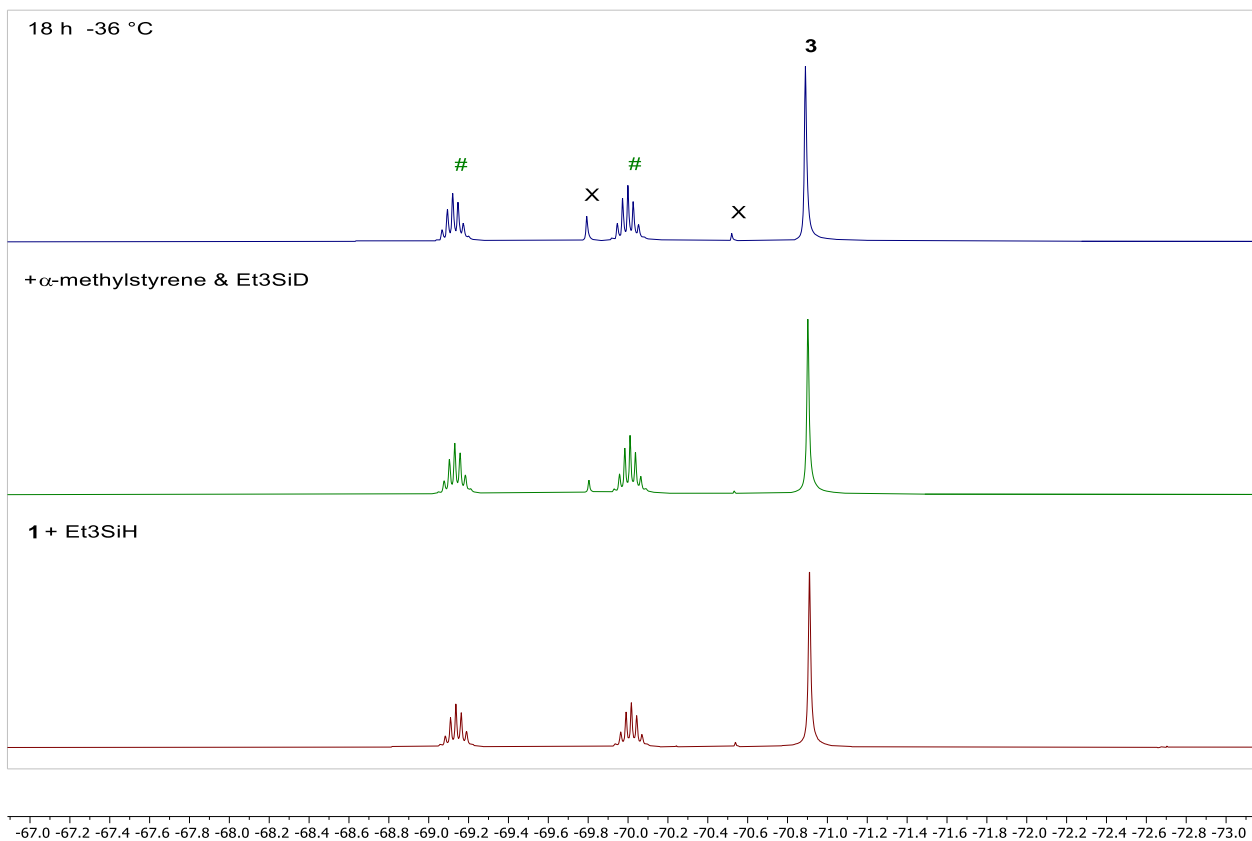

**Figure S 32:** Stacked <sup>19</sup>F NMR spectra of stoichiometric hydrosilylation experiment with Et<sub>3</sub>SiD (initiating with Et<sub>3</sub>SiH addition) in CD<sub>2</sub>Cl<sub>2</sub>. The formation of an undefined side product **X** was observed while the germylene species **3** and **4** (#) stayed untouched.

### 3 Computational Section

Calculations were carried out using ORCA 5.0.4.<sup>[17]</sup>

Geometry optimizations for the mechanistic investigations were carried out at the PBE0<sup>[18]</sup> level of theory. The calculations utilized the atom-pairwise dispersion correction based on tight binding partial charges (D4),<sup>[19]</sup> the def2-TZVP basis set,<sup>[20]</sup> CPCM solvation model with the corresponding parameters for dichloromethane, benzene, and acetonitrile. The method is denoted as PBE0-D4(CPCM)/def2-TZVP. The calculations were accelerated by resolution-of-identity (RI) approximation with def2/J auxiliary basis set.<sup>[21]</sup> The optimized geometries were verified as minima or transition states by analytical frequency calculations. The transition states were verified by IRC calculations. Cartesian coordinates of the optimized geometries are given in Appendix A.

For details regarding the ion affinities calculations see section 3.6 Calculation of ion affinities.

#### 3.2 Hydrosilane activation mechanism

The activation of HSiEt<sub>3</sub> with donor-free germane **1** and silane **2** was calculated on the BPE0-D4(CPCM=DCM)/BPE0-D4(CPCM=DCM) level of theory (Figure S 33). The reactions are predicted to proceed in two step. First, the silane coordinates to the Lewis acidic center to form the intermediate **INT\_A**. The second step involves the formal metathesis reaction of Si-H E-O bond to form the ring-opening product **3\***. With a barrier of 12.8 kcal mol<sup>-1</sup> (TS(1\_INT\_A\_Ge)) the hydride abstraction and the ring opening are easily accessible in the case of germane **1**. In the silicon case, the barrier (TS(INT\_A\_Si\_3\*)) is significantly higher in energy (28.8 kcal mol<sup>-1</sup>). Furthermore, the overall process is endergonic by 5.9 kcal mol<sup>-1</sup>. In contrast, for germane **1** the reaction is exergonic by 13.0 kcal mol<sup>-1</sup>. The calculations align well with the experimentally observed reactivity, as no interaction between silane **2** and hydrosilanes was monitored. Germylene **1** on the other hand readily activates Et<sub>3</sub>SiH forming compound **3\*** that decomposes to release the germylene **3** and mono-silylated perfluoropinacol **4**.

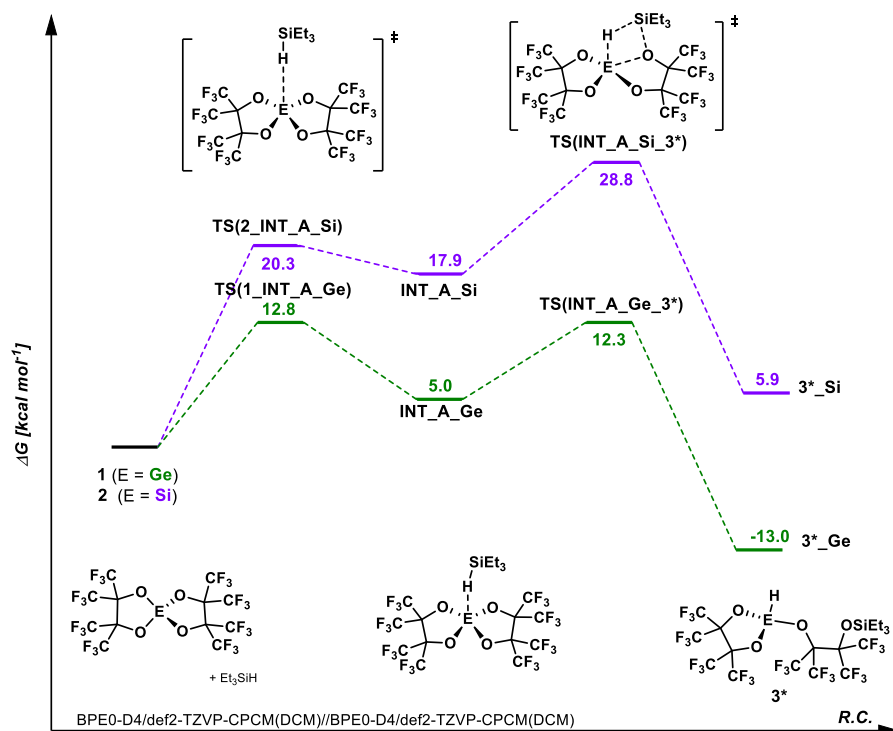

**Figure S 33:** Reaction mechanism for the activation  $\text{Et}_3\text{SiH}$  with **1** and **2**.

**Table S 4:** PBE0-D4(CPCM=DCM)/def2-TZVP//PBE0-D4(CPCM=DCM)/def2-TZVP calculated energies ( $E_h$ ) (E – electronic energy; H – total enthalpy; G – Gibbs energy;  $G_s = G + G_{\text{conc}}$ ) of the compounds in Figure S33. Thermochemistry at 298.15 K.

| Compound         | E              | H              | G              | $G_s$        |
|------------------|----------------|----------------|----------------|--------------|
| $\text{HSiEt}_3$ | -527.47794089  | -527.26095375  | -527.30955265  | -527.3065325 |
| <b>1</b>         | -5229.60383427 | -5229.40102877 | -5229.50026724 | -5229.497247 |
| TS(1_INT_A_Ge)   | -5757.08372525 | -5756.66273811 | -5756.78633436 | -5756.783314 |
| INT_A_Ge         | -5757.09570753 | -5756.67461003 | -5756.79886433 | -5756.795844 |
| TS(INT_A_3*_Ge)  | -5757.08459280 | -5756.66407390 | -5756.78714612 | -5756.784126 |
| 3*_Ge            | -5757.12723823 | -5756.70436594 | -5756.82749411 | -5756.784126 |
| <b>2</b>         | -3442.33762144 | -3442.13280403 | -3442.23043761 | -3442.227417 |
| TS(1_INT_A_Si)   | -3969.80591658 | -3969.38299325 | -3969.50463621 | -3969.501616 |
| INT_A_Si         | -3969.80988667 | -3969.38569342 | -3969.50849320 | -3969.505473 |
| TS(INT_A_3*_Si)  | -3969.79415802 | -3969.37080317 | -3969.49109157 | -3969.488071 |
| 3*_Si            | -3969.83058328 | -3969.40556420 | -3969.52758424 | -3969.524564 |

### 3.3 Thermochemistry analysis of the hydrosilylation catalytic cycle

The reported energy differences for reaction components are at the PBE0-D4(CPCM)/def2-TZVP//PBE0-D4(CPCM)/def2-TZVP level of theory with the gas to liquid phase correction term, i.e. concentration-induced free-energy shift  $G_{\text{conc}} = RT\ln(24.5)$  (1.51, 1.90 and 2.24 kcal mol<sup>-1</sup> at 238.15, 298.15 and 298.15K, respectively) is included in the free energy  $G_S$  of each compound.

**Table S 5:** Thermochemistry analysis at 238.15, 298.15 and 353.15 K for the components of the reaction mechanism in Figure 4, calculated at the PBE0-D4(CPCM=DCM)/def2-TZVP level of theory. E – Electronic energy ( $E_h$ ); (G-E)<sub>T</sub> - Gibbs energy minus the electronic energy at the different temperatures ( $E_h$ );  $G_T$  – Gibbs energy at the different temperatures ( $E_h$ ),  $G_T = E + (G-E)_T + G_{\text{conc T}}$ .

| Compound                                                          | E           | (G-E) <sub>238.15K</sub> | (G-E) <sub>298.15K</sub> | (G-E) <sub>353.15K</sub> | $G_{S,238.15K}$ | $G_{S,298.15K}$ | $G_{S,353.15K}$ |
|-------------------------------------------------------------------|-------------|--------------------------|--------------------------|--------------------------|-----------------|-----------------|-----------------|
| HSiEt <sub>3</sub>                                                | -527.47794  | 0.17746                  | 0.16839                  | 0.15941                  | -527.29806      | -527.30653      | -527.31495      |
| C <sub>6</sub> H <sub>5</sub> C(CH <sub>3</sub> )=CH <sub>2</sub> | -348.67931  | 0.13738                  | 0.12950                  | 0.12174                  | -348.53952      | -348.54679      | -348.55399      |
| PhC(H)(CH <sub>3</sub> )-CH <sub>2</sub> SiEt <sub>3</sub>        | -876.20164  | 0.33974                  | 0.32769                  | 0.31545                  | -875.85948      | -875.87093      | -875.88261      |
| (pin <sup>F</sup> )Ge: ( <b>3</b> )                               | -3653.18557 | 0.04907                  | 0.03726                  | 0.02535                  | -3653.13409     | -3653.14529     | -3653.15664     |
| INT1                                                              | -7655.09020 | 0.27477                  | 0.25312                  | 0.23058                  | -7654.81303     | -7654.83406     | -7654.85605     |
| TS1                                                               | -7655.08522 | 0.27506                  | 0.25363                  | 0.23130                  | -7654.80775     | -7654.82857     | -7654.85034     |
| INT2                                                              | -8182.57273 | 0.47418                  | 0.44852                  | 0.42165                  | -8182.09614     | -8182.12119     | -8182.14750     |
| TS2                                                               | -8182.56381 | 0.47632                  | 0.45096                  | 0.42439                  | -8182.08508     | -8182.10984     | -8182.13585     |

### 3.4 Alternative mechanisms for the catalytic hydrosilylation

Initially we considered a few proposed mechanisms for catalytic hydrosilylation of the  $\alpha$ -methylstyrene mediated by the germylene **3**, which involved one molecule of the germylene.

In the mechanism shown in Figure S34,  $\alpha$ -methylstyrene coordinates to the germylene to form the coordination intermediate INT1'. The concerted addition of the silane across the C-C bond is exergonic by 12.3 kcal mol<sup>-1</sup>, however it need to overcome a very high lying transition state TS3 at 37.0 kcal mol<sup>-1</sup>, making this reaction pathway infeasible under the experimental conditions.

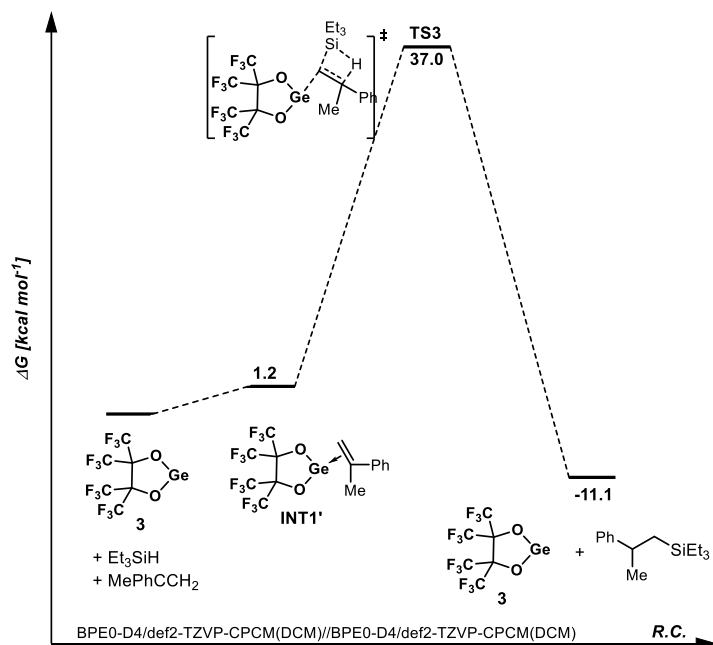

**Figure S 34:** Alternative mechanism for hydrosilylation by **3**, via olefin activation.

In an additional mechanism that was considered by us, the silane and the olefin are activated in a concerted fashion via a 5-membered transition state **TS4** at 23.8 kcal mol<sup>-1</sup> to form the Ge(IV) intermediate **INT3**. However, **TS4** is by 2.0 kcal mol<sup>-1</sup> higher in energy than the rate determining transition state **TS2**. Additionally, the intermediate **INT3** is a very deep minimum. The reductive elimination of the silylated product from **INT3** is endergonic by 8.8 kcal mol<sup>-1</sup> and would need to overcome a barrier of 54.6 kcal mol<sup>-1</sup>, which is unfeasible. Since **INT3** is not observed in the catalytic reaction mixtures we also rule out this scenario.

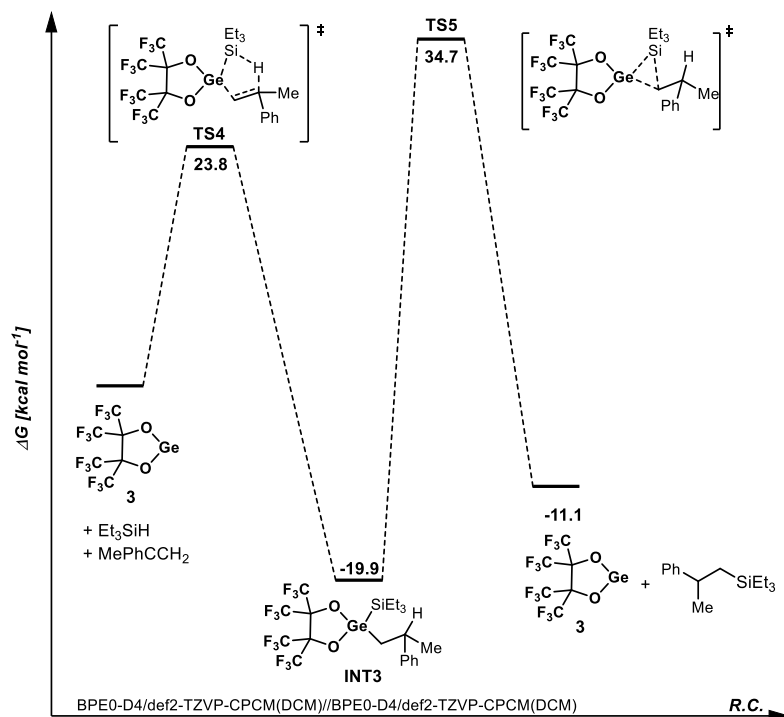

**Figure S 35:** Alternative mechanism for hydro-silylation by **3**, via concerted activation of the silane and the olefin.

We also considered a possibility in which the germylene activates the silane at the first step of the catalytic cycle. Thus, we calculated the transition states and the products of the oxidation addition of the germanium center across the Si-H bond to form the corresponding germane **5** (Figure 36, purple), as well the addition across the Ge-O bond to form the silyl ether **6** (Figure 36, orange). In the former case, the reaction is exergonic by 2.5 kcal mol<sup>-1</sup>, however the barrier, **TS6** at 34.5 kcal mol<sup>-1</sup> is too high to overcome at rt. The formation of **6**, is both endergonic and requires a very high barrier, **TS7** at 36.0 kcal mol<sup>-1</sup>. Thus, we had to rule out the mechanism of the catalytic hydro-silylation that involve initial activation of the silane by **3**.



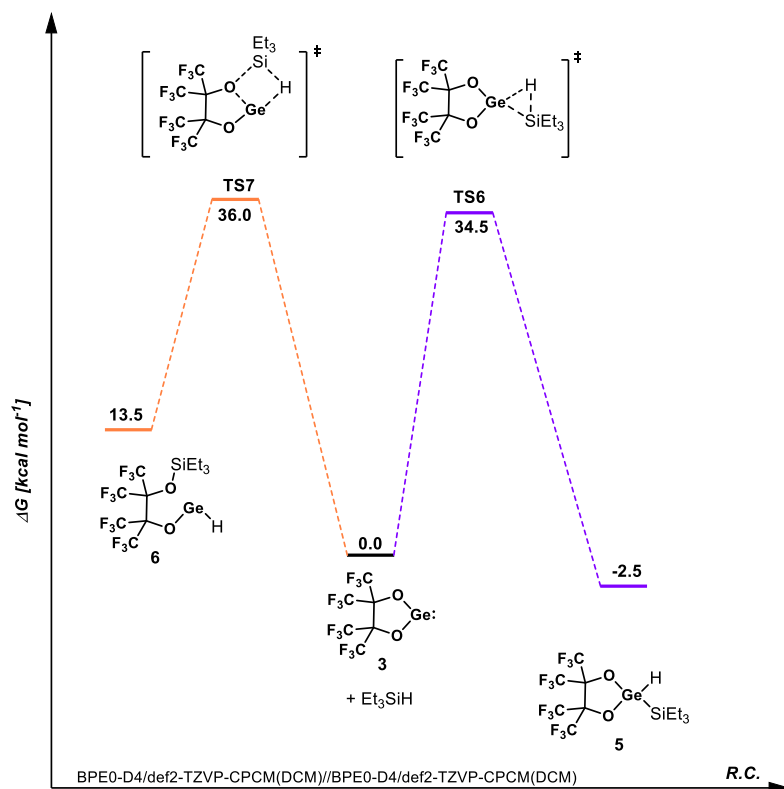

**Figure S 36.** Activation of  $\text{Et}_3\text{SiH}$  by **3**.

**Table S 6:** PBE0-D4(CPCM=DCM)/def2-TZVP//PBE0-D4(CPCM=DCM)/def2-TZVP calculated energies ( $E_h$ ) (E – electronic energy; H – total enthalpy; G – Gibbs energy;  $G_s = G + G_{\text{conc}}$ ) of the compounds in Figures S34, S35, S36. Thermochemistry at 298.15 K.

| Compound                                                     | E              | H              | G              | $G_s$        |
|--------------------------------------------------------------|----------------|----------------|----------------|--------------|
| $\text{Et}_3\text{SiH}$                                      | -527.47794089  | -527.26095375  | -527.30955265  | -527.3065325 |
| $\text{C}_6\text{H}_5\text{C}(\text{CH}_3)=\text{CH}_2$      | -348.67930941  | -348.50860159  | -348.54980691  | -348.5467868 |
| $\text{PhC}(\text{H})(\text{CH}_3)-\text{CH}_2\text{SiEt}_3$ | -876.20163736  | -875.80789303  | -875.87394682  | -875.8709267 |
| (pin <sup>F</sup> )Ge: ( <b>3</b> )                          | -3653.18556968 | -3653.08432860 | -3653.14830528 | -3653.145285 |
| <b>INT1'</b>                                                 | -4001.88343534 | -4001.60950462 | -4001.69322602 | -4001.690206 |
| <b>INT3</b>                                                  | -4529.42479979 | -4528.92716084 | -4529.03327144 | -4529.030251 |
| <b>5</b>                                                     | -4180.68961685 | -4180.36895133 | -4180.45874709 | -4180.455727 |
| <b>6</b>                                                     | 4180.66063500  | -4180.34073622 | -4180.43037547 | -4180.427355 |
| <b>TS3</b>                                                   | -4529.33050459 | -4528.83632640 | -4528.94268493 | -4528.939665 |
| <b>TS4</b>                                                   | -4529.34815297 | -4528.85730789 | -4528.96362146 | -4528.960601 |
| <b>TS5</b>                                                   | -4529.33432713 | -4528.83959212 | -4528.94643774 | -4528.943418 |
| <b>TS6</b>                                                   | -4180.62860727 | -4180.31071973 | -4180.39985862 | -4180.396838 |
| <b>TS7</b>                                                   | -4180.62859703 | -4180.31011627 | -4180.39745030 | -4180.394430 |

### 3.5 Calculated energies for compounds in Figure 3 and Scheme 2B.

**Table S 7:** PBE0-D4(CPCM=Benzene)/def2-TZVP//PBE0-D4(CPCM=Benzene)/def2-TZVP calculated energies ( $E_h$ ) (E – electronic energy; H – total enthalpy; G – Gibbs energy;  $G_s = G + G_{\text{conc}}$ ) of the compounds in Figure 3. Thermochemistry at 298.15 K.

| Compound                                             | E              | H              | G              | $G_s$        |
|------------------------------------------------------|----------------|----------------|----------------|--------------|
| <b>1</b> -MeCN                                       | -5362.27989486 | -5362.02487581 | -5362.13407019 | -5362.13105  |
| <b>2</b> -MeCN                                       | -3575.00611941 | -3574.74907229 | -3574.85531876 | -3574.852299 |
| $\text{B}(\text{C}_6\text{F}_5)_3$                   | -2207.04435998 | -2206.85835763 | -2206.94390926 | -2206.940889 |
| $\text{MeCN} \cdot \text{B}(\text{C}_6\text{F}_5)_3$ | -2339.72502805 | -2339.48685703 | -2339.58041533 | -2339.577602 |
| <b>1</b>                                             | -5229.60274820 | -5229.39943902 | -5229.49860457 | -5229.495584 |
| <b>2</b>                                             | -3442.33672263 | -3442.13138544 | -3442.22895812 | -3442.225938 |

**Table S 8:** PBE0-D4(CPCM=DCM)/def2-TZVP//PBE0-D4(CPCM=DCM)/def2-TZVP calculated energies ( $E_h$ ) (E – electronic energy; H – total enthalpy; G – Gibbs energy;  $G_S = G + G_{\text{conc}}$ ) of the compounds in Scheme 2B. Thermochemistry at 298.15 K.

| Compound                               | E              | H              | G              | $G_S$        |
|----------------------------------------|----------------|----------------|----------------|--------------|
| Et <sub>3</sub> SiH                    | -527.47794089  | -527.26095375  | -527.30955265  | -527.3065325 |
| <b>1</b>                               | -5229.60383427 | -5229.40102877 | -5229.50026724 | -5229.497247 |
| <b>1</b> ·MeCN                         | -5362.28957277 | -5362.03518325 | -5362.14349099 | -5362.140471 |
| B[H-1]                                 | -5230.38307456 | -5230.17303971 | -5230.27259092 | -5230.269571 |
| [MeCN→Et <sub>3</sub> Si] <sup>+</sup> | -659.40109109  | -659.13947027  | -659.19731608  | -659.1942959 |
| <b>3</b>                               | -3653.18556968 | -3653.08432860 | -3653.14830528 | -3653.145285 |
| <b>3</b> ·MeCN                         | -3785.85639647 | -3785.70362806 | -3785.77885706 | -3785.775837 |
| <b>3*</b> _Ge                          | -5757.12723823 | -5756.70436594 | -5756.82749411 | -5756.784126 |
| <b>4</b>                               | -2103.92509554 | -2103.60313079 | -2103.68923676 | -2103.686217 |

**Table S 9:** PBE0-D4(CPCM=acetonitrile)/def2-TZVP//PBE0-D4(CPCM=acetonitrile)/def2-TZVP calculated energies ( $E_h$ ) (E – electronic energy; H – total enthalpy; G – Gibbs energy;  $G_S = G + G_{\text{conc}}$ ) of the compounds in Scheme 2B. Thermochemistry at 298.15 K.

| Compound                               | E              | H              | G              | $G_S$        |
|----------------------------------------|----------------|----------------|----------------|--------------|
| Et <sub>3</sub> SiH                    | -527.47814599  | -527.26125033  | -527.30985532  | -527.3068352 |
| <b>1</b>                               | -5229.60411347 | -5229.40144558 | -5229.50070480 | -5229.497685 |
| <b>1</b> ·MeCN                         | -5362.29230028 | -5362.03809409 | -5362.14640094 | -5362.143381 |
| B[H-1]                                 | -5230.38799575 | -5230.17806933 | -5230.27760702 | -5230.274587 |
| [MeCN→Et <sub>3</sub> Si] <sup>+</sup> | -659.40790905  | -659.14636791  | -659.20410583  | -659.2010857 |
| <b>3</b> ·MeCN                         | -3785.85836779 | -3785.70572528 | -3785.78067625 | -3785.777656 |
| <b>4</b>                               | -2103.92589053 | -2103.60407120 | -2103.69020638 | -2103.687186 |

For comparison with the previously published results,<sup>[1]</sup> the gas phase ion affinities of **1** were calculated at the same level of theory, i.e. PBE0-D3BJ<sup>[22]</sup>/def2-TZVPP//DLPNO-CCSD(T)/aug-cc-pVQZ.<sup>[23]</sup> The ion affinity values of the reference compound Me<sub>3</sub>Si<sup>+</sup> (FIA = 953 kJ, HIA = 924 kJ) calculated at the CCSD(T)/CBS level of theory are taken from literature (Figure S 37).<sup>[24]</sup> The calculated energies are given in Table 1.

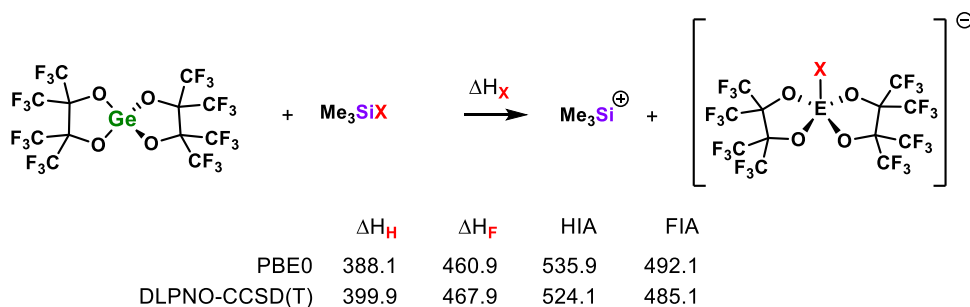

**Figure S 37.** . Hydride and fluoride ion affinities of **1**, relative to the reference compound Me<sub>3</sub>Si<sup>+</sup>.

Table 1. Calculated  $E_{\text{PBE0-D3}}$  (electronic energy, ( $E_h$ )) and  $H_{\text{PBE0-D3}}$  (enthalpy, ( $E_h$ )) at the PBE0-D3/def2-TZVPP//PBE0-D3/def2-TZVPP level of theory.  $E_{(\text{DLPNO-CCSD(T)})}$  – electronic energy at the DLPNO-CCSD(T)/aug-cc-pVQZ//PBE0-D3/def2-TZVPP level of theory.

| Compound                                                              | $E_{\text{PBE0-D3}}$ | $H_{\text{PBE0-D3}}$ | $E_{(\text{DLPNO-CCSD(T)})}$ |
|-----------------------------------------------------------------------|----------------------|----------------------|------------------------------|
| (pin <sup>F</sup> ) <sub>2</sub> Ge                                   | -5229.589261         | -5229.385278         | -5227.503704                 |
| [(pin <sup>F</sup> ) <sub>2</sub> GeH] <sup>-</sup> ( <b>B</b> [H-1]) | -5230.319351         | -5230.108305         | -5228.237155                 |
| [(pin <sup>F</sup> ) <sub>2</sub> GeF] <sup>-</sup> ( <b>B</b> [F-1]) | -5329.565126         | -5329.358558         | -5327.464448                 |
| Me <sub>3</sub> SiH                                                   | -409.6509397         | -409.5238372         | -409.254734                  |
| Me <sub>3</sub> SiF                                                   | -508.9243983         | -508.8018046         | -508.5078966                 |
| Me <sub>3</sub> Si <sup>+</sup>                                       | -408.7706389         | -408.6529826         | -408.3665695                 |

## 4 Single-Crystal X-ray Diffraction Analysis

### 4.1 Crystal Structure of 1·MeCN

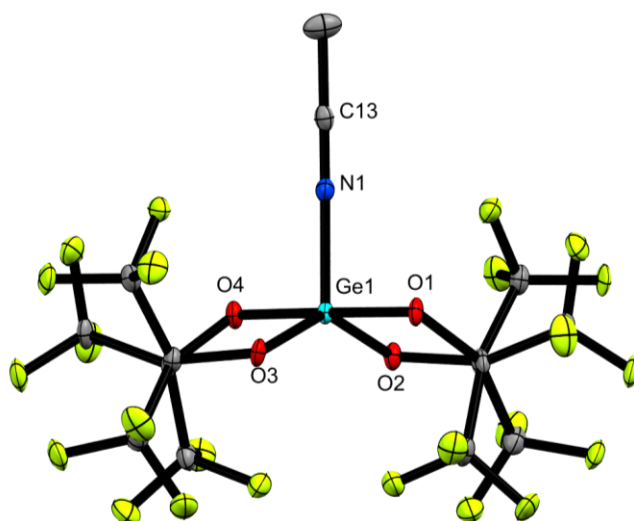

**Figure S 38:** Molecular structure of 1·MeCN with translational ellipsoids plotted at 50% probability level. Hydrogen atoms are omitted for clarity. Selected bond lengths [Å] and angles [deg]: Ge1–N1 1.933(4), Ge1–O1 1.827(3), Ge1–O2 1.794(3), Ge1–O3 1.782(3), Ge1–O4 1.833(3); O1–Ge1–O2 88.39(12), O1–Ge1–O4 179.20(13), O3–Ge1–O4 88.12(12), O2–Ge1–O3 136.47(13).

### 4.2 Crystal Structure of [K·(18-c-6)][F-1]

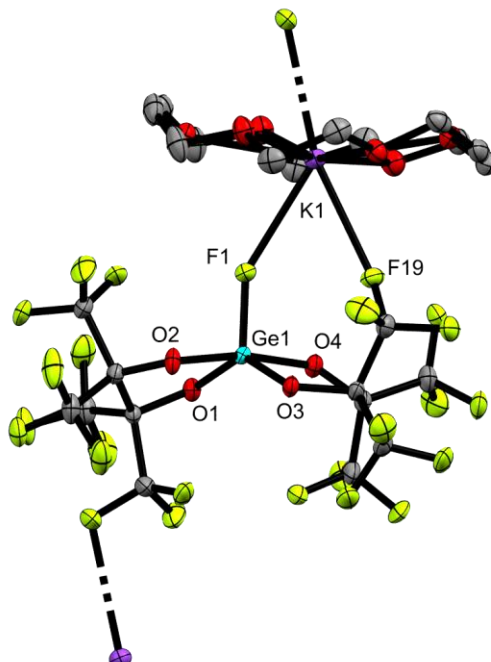

**Figure S 39:** Molecular structure of [K·(18-c-6)][F-1] with translational ellipsoids plotted at 50% probability level. Hydrogen atoms are omitted for clarity. Selected bond lengths [Å] and angles [deg]: Ge1–F1 1.7274(16), Ge1–O1 1.8122(19), Ge1–O2 1.841(2), Ge1–O3 1.8100(19), Ge1–O4 1.8467(19), F1–K1 2.8189(18); O1–Ge1–O4 90.60(9), O2–Ge1–O3 87.58(8), O1–Ge1–O2 86.70(9), O3–Ge1–O4 86.88(8).

### 4.3 Crystal Structure of donor-free silane **2**

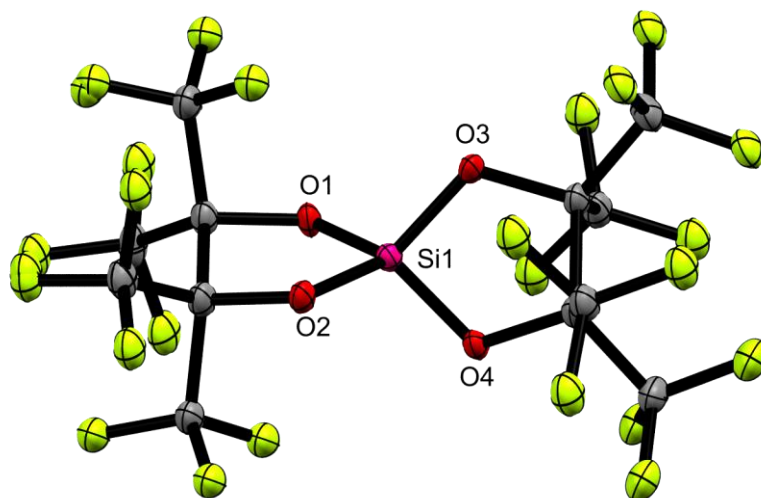

**Figure S 40:** Molecular structure of MeCN-free **2** with translational ellipsoids plotted at 50% probability level. Hydrogen atoms are omitted for clarity. The structure contains a second, twisted overlaying disordered, that is also omitted for clarity reasons. Selected bond lengths [Å] and angles [°]: Si1–O1 1.744(18), Si1–O2 1.754(17), Si1–O3 1.779(18), Si1–O4 1.684(18); O1–Si1–O4 131.7(8), O2–Si1–O3 166.0(8).

### 4.4 Crystal Structure of dioxane-coordinated germylene **3**

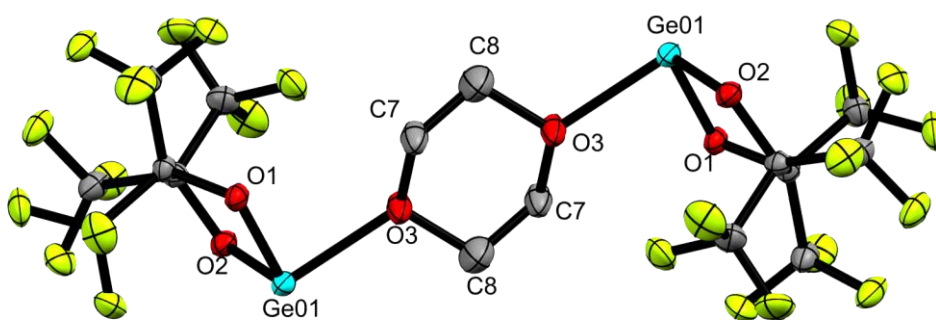

**Figure S 41:** Molecular structure of 1,4-dioxane-coordinated germylene **3** with translational ellipsoids plotted at 50% probability. Hydrogen atoms are omitted for clarity. The figure contains two symmetry-generated unit cells. Selected bond lengths [Å] and angles [°]: Ge01–O1 1.853(2), Ge01–O2 1.853(2), Ge01–O3 2.241(3); O1–Ge01–O2 85.60(10), O1–Ge01–O3 84.71(10), O2–Ge01–O3 106.29(11).

#### 4.5 Preliminary crystal structure of donor-free **1**

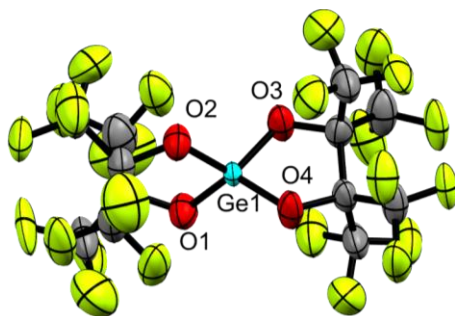

**Figure S 42:** Preliminary molecular structure of **1** with translational ellipsoids plotted at 50% probability. Because of heavy disorder only insufficient data refinement was possible. The depicted structure demonstrates a similar connectivity as for compound **2**. However, no bond lengths and angles can be discussed. This depiction is no structure evidence due to lacking data quality.

**Table S 10:** Crystallographic Details.

|                                                                                                               | <b>1·MeCN</b>                                                    | <b>[K·(18-c-6)][F-1]</b>                                                                       | <b>2</b>                                             |
|---------------------------------------------------------------------------------------------------------------|------------------------------------------------------------------|------------------------------------------------------------------------------------------------|------------------------------------------------------|
| CCDC-Number                                                                                                   | 2286080                                                          | 2286083                                                                                        | 2286081                                              |
| <b>Crystal Data</b>                                                                                           |                                                                  |                                                                                                |                                                      |
| Chemical formula                                                                                              | C <sub>14</sub> H <sub>3</sub> F <sub>24</sub> GeNO <sub>4</sub> | C <sub>48</sub> H <sub>47</sub> F <sub>50</sub> Ge <sub>2</sub> K <sub>2</sub> O <sub>20</sub> | C <sub>12</sub> F <sub>24</sub> O <sub>4</sub> Si    |
| <i>M<sub>r</sub></i>                                                                                          | 777.78                                                           | 2116.91                                                                                        | 692.21                                               |
| Crystal system,<br>space group                                                                                | Orthorhombic,<br><i>Pbcn</i>                                     | Triclinic,<br><i>-P1</i>                                                                       | Orthorhombic,<br><i>P2<sub>1</sub>2<sub>1</sub>2</i> |
| Temperature (K)                                                                                               | 100                                                              | 100                                                                                            | 100                                                  |
| <i>a, b, c</i> (Å)                                                                                            | 23.5238(15),<br>8.6067(5),<br>21.8982(13)                        | 11.2001(10),<br>15.7831(14),<br>22.3057(19)                                                    | 8.3174(7),<br>10.3383(8),<br>11.4253(8)              |
| $\alpha, \beta, \gamma$ (°)                                                                                   | 90,<br>90,<br>90                                                 | 107.062(3),<br>102.834(3),<br>95.235(3)                                                        | 90,<br>90,<br>90                                     |
| <i>V</i> (Å <sup>3</sup> )                                                                                    | 4433.6(5)                                                        | 3623.2(6)                                                                                      | 982.44(13)                                           |
| <i>Z</i>                                                                                                      | 8                                                                | 2                                                                                              | 2                                                    |
| Radiation type                                                                                                | Mo <i>K</i> $\alpha$                                             | Mo <i>K</i> $\alpha$                                                                           | Mo <i>K</i> $\alpha$                                 |
| $\mu$ (mm <sup>-1</sup> )                                                                                     | 1.611                                                            | 1.141                                                                                          | 0.369                                                |
| Crystal size (mm)                                                                                             | 0.174 × 0.112 × 0.068                                            | 0.58 × 0.318 × 0.279                                                                           | 0.255 × 0.207 × 0.160                                |
| Crystal shape                                                                                                 | Fragment                                                         | Block                                                                                          | Fragment                                             |
| Color                                                                                                         | Clear colorless                                                  | Clear colorless                                                                                | Clear colorless                                      |
| <b>Data Collection</b>                                                                                        |                                                                  |                                                                                                |                                                      |
| Diffractometer                                                                                                | Bruker Photon CMOS                                               | Bruker Photon CMOS                                                                             | Bruker Photon CMOS                                   |
| Absorption correction                                                                                         | Multi-scan                                                       | Multi-scan                                                                                     | Multi-scan                                           |
| <i>T<sub>min</sub>, T<sub>max</sub></i>                                                                       | 0.7453, 0.6764                                                   | 0.7453, 0.6350                                                                                 | 0.7452, 0.5419                                       |
| No. of measured, independent,<br>and observed [ <i>I</i> > 2σ( <i>I</i> )]<br>reflections                     | 117042, 4064, 3029                                               | 133009, 13270, 11373                                                                           | 6489, 1797, 1437                                     |
| <i>R<sub>int</sub></i>                                                                                        | 0.0960                                                           | 0.0472                                                                                         | 0.0820                                               |
| $\theta$ range (°) for cell measurement                                                                       | 2.52- 25.35                                                      | 2.33-25.72                                                                                     | 2.66-25.34                                           |
| Data completeness                                                                                             | 0.999                                                            | 1.000                                                                                          | 0.998                                                |
| <b>Refinement</b>                                                                                             |                                                                  |                                                                                                |                                                      |
| <i>R</i> [ <i>F</i> <sup>2</sup> > 2σ( <i>F</i> <sup>2</sup> )], <i>R</i> ( <i>F</i> <sup>2</sup> ), <i>S</i> | 0.0458, 0.1171, 1.017                                            | 0.0348, 0.0717, 1.087                                                                          | 0.0619, 0.1409, 1.047                                |
| No. of reflections                                                                                            | 4046                                                             | 13270                                                                                          | 1797                                                 |
| No. of parameters                                                                                             | 270                                                              | 1277                                                                                           | 177                                                  |
| No. of restraints                                                                                             | 398                                                              | 56                                                                                             | 523                                                  |
| $\Delta\rho_{\max}, \Delta\rho_{\min}$ (e Å <sup>-3</sup> )                                                   | 2.38, -2.38                                                      | 0.55, -0.48                                                                                    | 0.47, -0.49                                          |

|                                                                                   | <b>1</b>                                                  | <b>(3)2·C<sub>4</sub>H<sub>8</sub>O<sub>2</sub></b>                           |
|-----------------------------------------------------------------------------------|-----------------------------------------------------------|-------------------------------------------------------------------------------|
| CCDC-Number                                                                       | 2286830                                                   | 2286082                                                                       |
| <b>Crystal Data</b>                                                               |                                                           |                                                                               |
| Chemical formula                                                                  | C <sub>12</sub> F <sub>24</sub> GeO <sub>47</sub>         | C <sub>16</sub> H <sub>8</sub> F <sub>24</sub> Ge <sub>2</sub> O <sub>6</sub> |
| $M_r$                                                                             | 736.73                                                    | 897.40                                                                        |
| Crystal system,<br>space group                                                    | Orthorhombic,<br><i>P</i> 2 <sub>1</sub> 2 <sub>1</sub> 2 | Monoclinic,<br><i>P</i> 2 <sub>1</sub> / <i>n</i>                             |
| Temperature (K)                                                                   | 100                                                       | 100                                                                           |
| $a, b, c$ (Å)                                                                     | 18.5204(10),<br>18.7351(9),<br>11.6382(6)                 | 11.8448(8),<br>7.7953(5),<br>14.4848(9)                                       |
| $\alpha, \beta, \gamma$ (°)                                                       | 90,<br>90,<br>90                                          | 90,<br>93.398(2),<br>90                                                       |
| $V$ (Å <sup>3</sup> )                                                             | 4038.2(4)                                                 | 1335.08(15)                                                                   |
| $Z$                                                                               | 8                                                         | 2                                                                             |
| Radiation type                                                                    | Mo <i>K</i> $\alpha$                                      | Mo <i>K</i> $\alpha$                                                          |
| $\mu$ (mm <sup>-1</sup> )                                                         | 1.760                                                     | 2.454                                                                         |
| Crystal size (mm)                                                                 | 0.258 × 0.245 × 0.201                                     | 0.298 × 0.25 × 0.154                                                          |
| Crystal shape                                                                     | Fragment                                                  | Block                                                                         |
| Color                                                                             | Clear colorless                                           | Clear colorless                                                               |
| <b>Data Collection</b>                                                            |                                                           |                                                                               |
| Diffractometer                                                                    | Bruker Photon CMOS                                        | Bruker Photon CMOS                                                            |
| Absorption correction                                                             | Multi-scan                                                | Multi-scan                                                                    |
| $T_{\min}, T_{\max}$                                                              | 0.7453, 0.5705                                            | 0.7453, 0.5707                                                                |
| No. of measured, independent,<br>and observed [ $I > 2\sigma(I)$ ]<br>reflections | 154374, 8248, 7776                                        | 54591, 2443, 2328                                                             |
| $R_{\text{int}}$                                                                  | 0.0486                                                    | 0.0412                                                                        |
| $\theta$ range (°) for cell measurement                                           | 2.20-26.67                                                | 2.16-25.35                                                                    |
| Data completeness                                                                 | 0.999                                                     | 1.000                                                                         |
| <b>Refinement</b>                                                                 |                                                           |                                                                               |
| $R[F^2 > 2\sigma(F^2)], R(F^2), S$                                                | 0.1054, 0.3131, 1.618                                     | 0.0374, 0.0891, 1.157                                                         |
| No. of reflections                                                                | 8248                                                      | 2443                                                                          |
| No. of parameters                                                                 | 720                                                       | 217                                                                           |
| No. of restraints                                                                 | 2945                                                      | 0                                                                             |
| $\Delta\rho_{\max}, \Delta\rho_{\min}$ (e Å <sup>-3</sup> )                       | 1.93, -1.34                                               | 1.59, -0.62                                                                   |

The data have been assigned the following deposition numbers which can either be quoted as CCDC Numbers or CSD Numbers. A CCDC Number is usually quoted for an organic or metal-organic structure, whereas a CSD Number is usually quoted for an inorganic structure.

CCDC XXXXXXXX-YYYYYYYY (generally used for organic and metal-organic structures)

CSD XXXXXXXX-YYYYYYYY (generally used for inorganic structures)

Deposition Number 2286080-2286083, 2286830

-----  
Summary of Data - Deposition Number 2286080  
-----

Compound Name:

Data Block Name: data\_GraAn1\_fine

Unit Cell Parameters: a 23.5238(15) b 8.6067(5) c 21.8982(13) Pbcn  
-----

-----  
Summary of Data - Deposition Number 2286081  
-----

Compound Name:

Data Block Name: data\_TscFl23\_fine

Unit Cell Parameters: a 8.3174(7) b 10.3383(8) c 11.4253(8) P21212  
-----

-----  
Summary of Data - Deposition Number 2286082  
-----

Compound Name:

Data Block Name: data\_mo\_tscf132\_0ma\_a

Unit Cell Parameters: a 11.8448(8) b 7.7953(5) c 14.4848(9) P21/n  
-----

-----  
Summary of Data - Deposition Number 2286083  
-----

Compound Name:

Data Block Name: data\_mo\_tscf129\_0m

Unit Cell Parameters: a 11.2001(10) b 15.7831(14) c 22.3057(19) P-1  
-----

-----  
Summary of Data - Deposition Number 2286830  
-----

Compound Name:

Data Block Name: data\_TscFl26\_fine2

Unit Cell Parameters: a 18.5204(10) b 18.7351(9) c 11.6382(6) P21212



## 5 NMR Spectra

### 5.1 NMR spectra of 1·MeCN

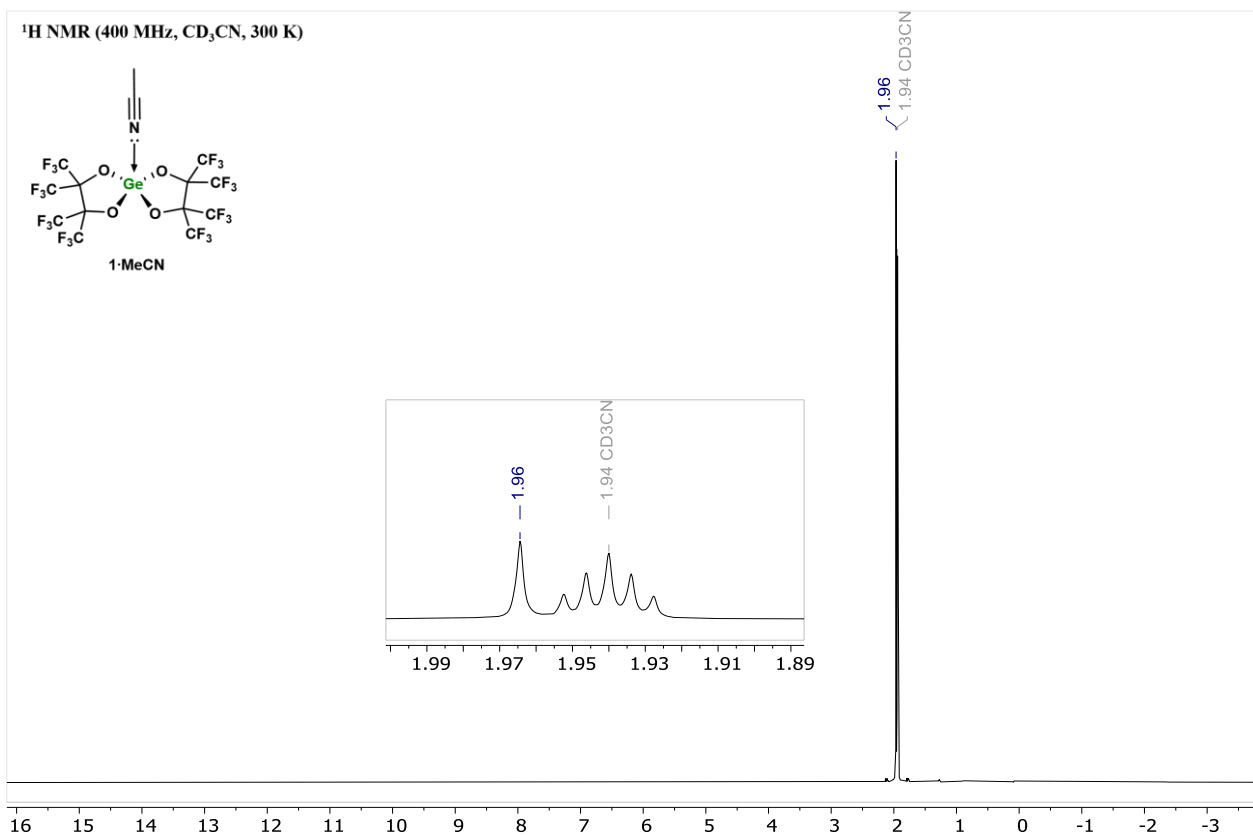

Figure S 43: <sup>1</sup>H NMR spectrum of 1·MeCN in CD<sub>3</sub>CN at 300 K.

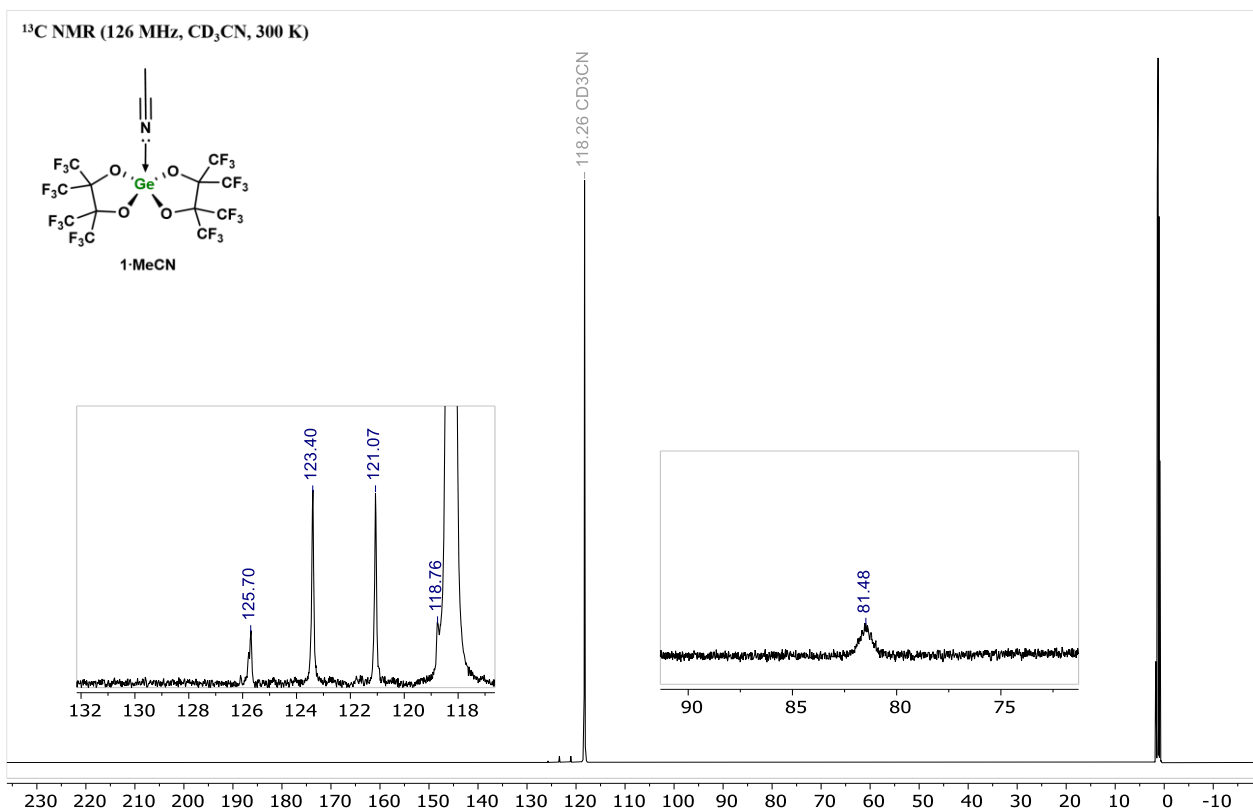

Figure S 44: <sup>13</sup>C NMR spectrum of 1·MeCN in CD<sub>3</sub>CN at 300 K.

$^{19}\text{F}$  NMR (377 MHz,  $\text{CD}_3\text{CN}$ , 300 K)

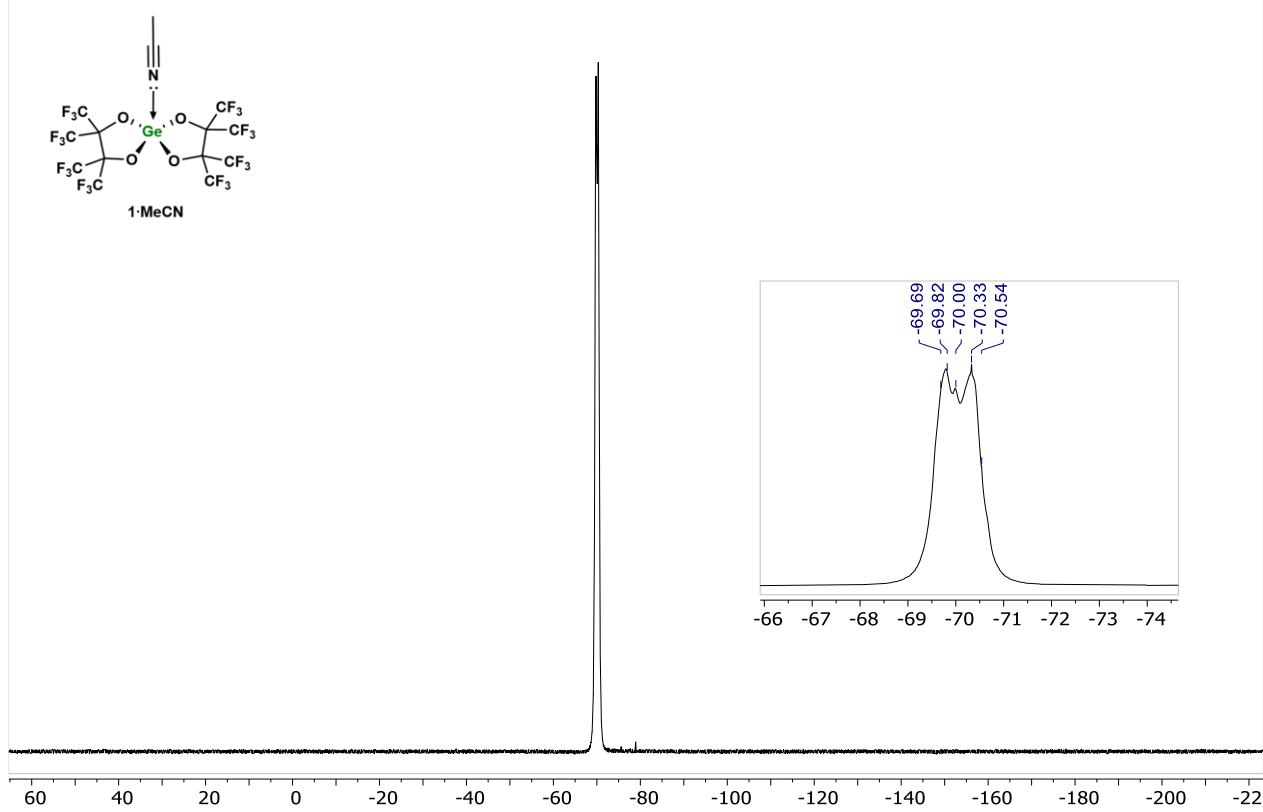

**Figure S 45:**  $^{19}\text{F}$  NMR spectrum of **1-MeCN** in  $\text{CD}_3\text{CN}$  at 300 K.

## 5.2 NMR spectra of **1**

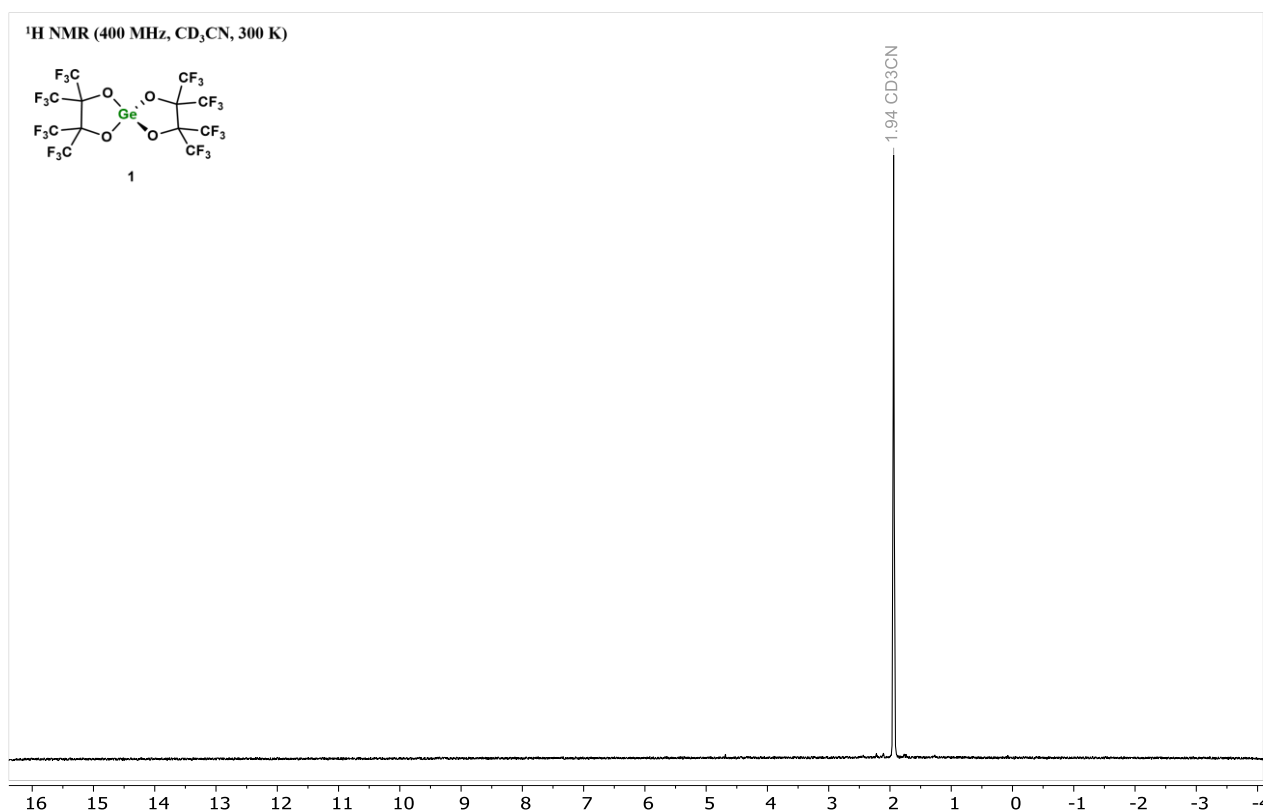

Figure S 46: <sup>1</sup>H NMR spectrum of **1** in CD<sub>3</sub>CN at 300 K.

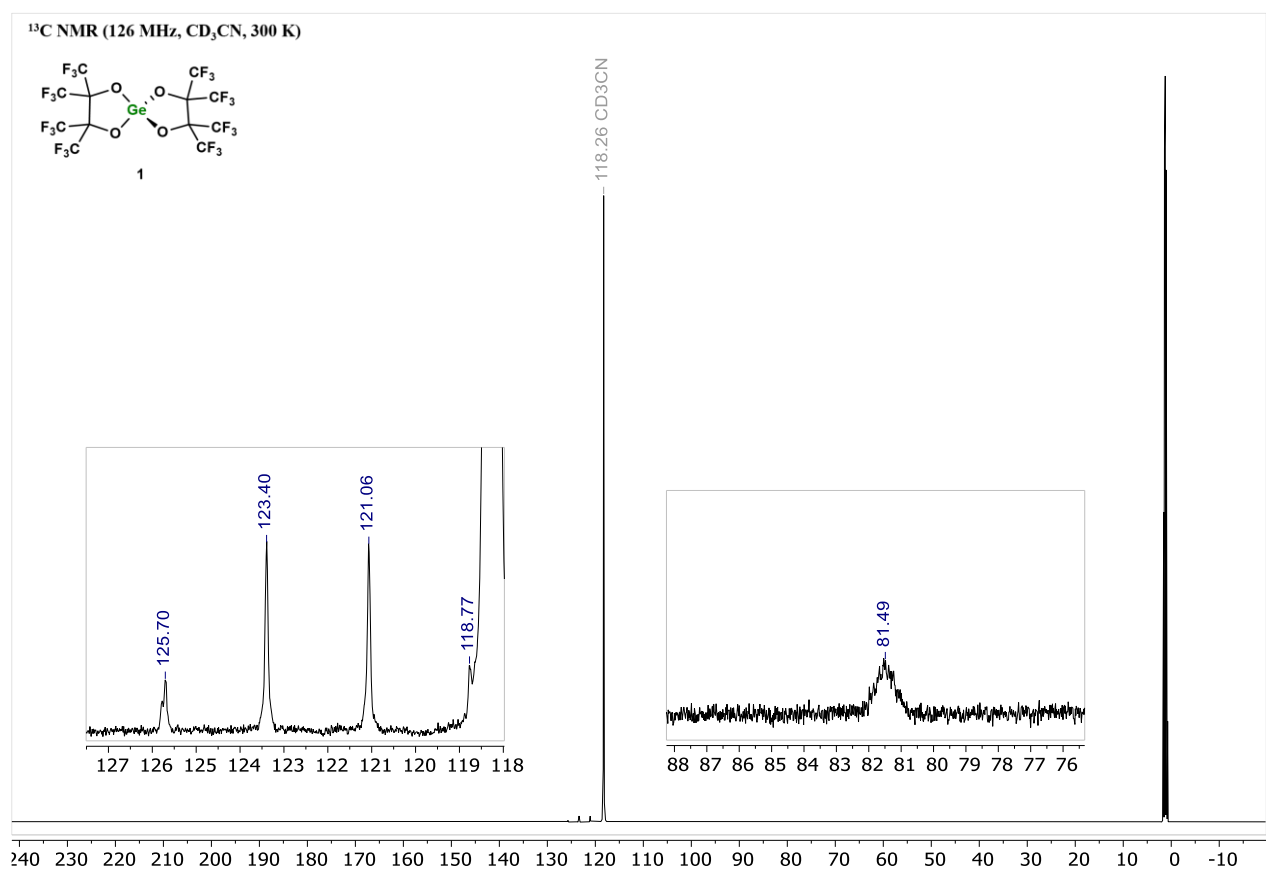

Figure S 47: <sup>13</sup>C NMR spectrum of **1** in CD<sub>3</sub>CN at 300 K.

$^{19}\text{F}$  NMR (377 MHz,  $\text{CD}_3\text{CN}$ , 300 K)

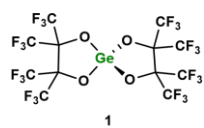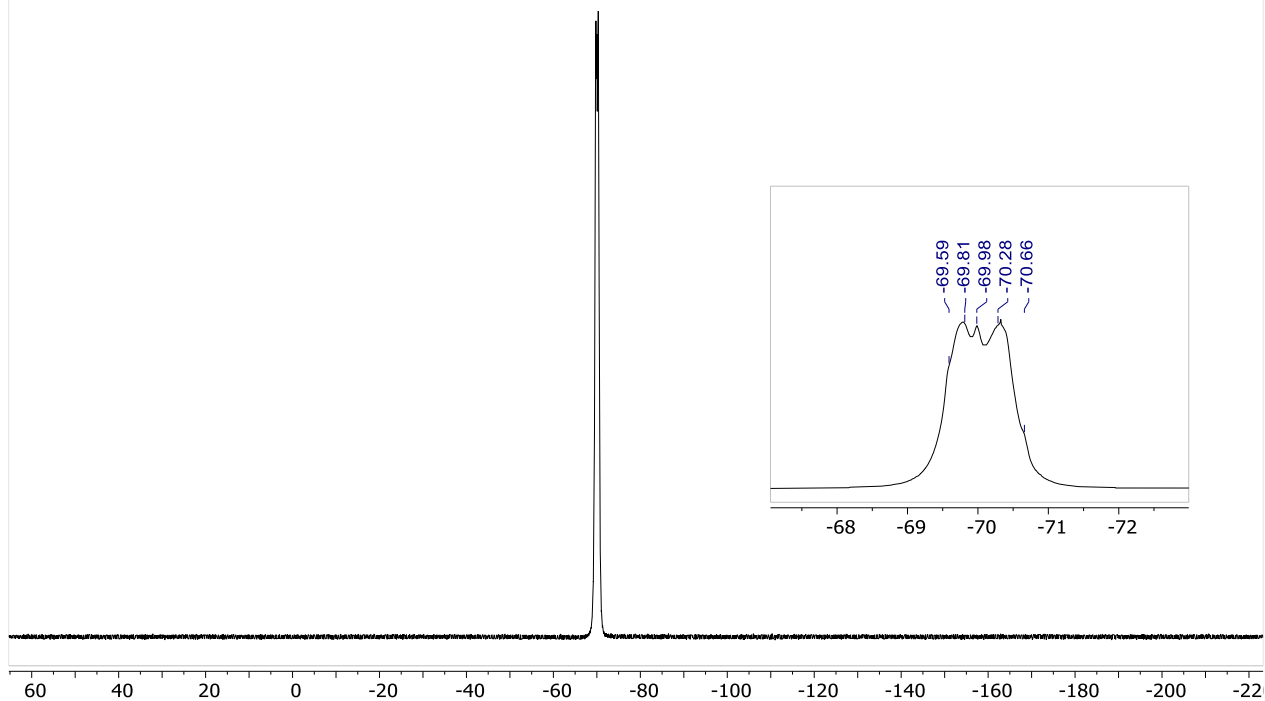

**Figure S 48:**  $^{19}\text{F}$  NMR spectrum of **1** in  $\text{CD}_3\text{CN}$  at 300 K.

### 5.3 NMR spectra of 2

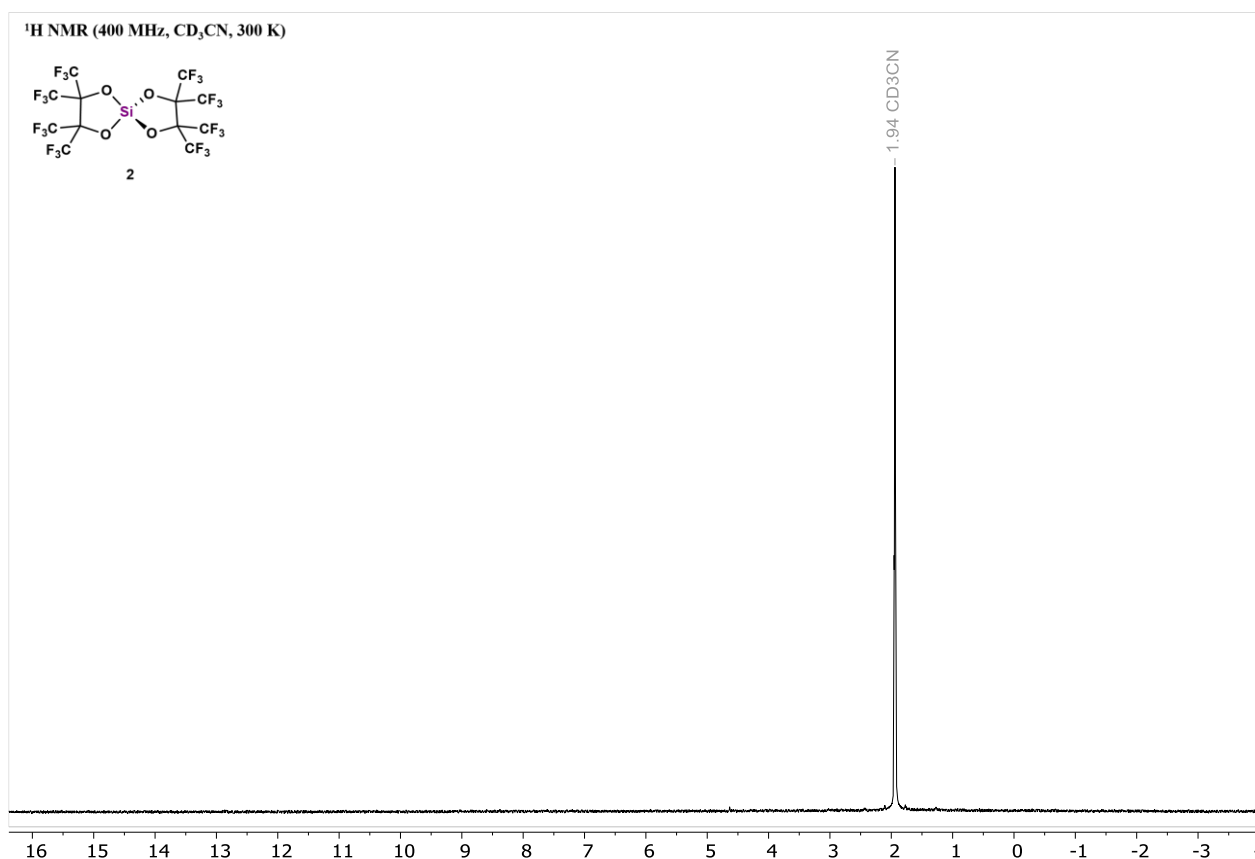

Figure S 49: <sup>1</sup>H NMR spectrum of 2 in CD<sub>3</sub>CN at 300 K.

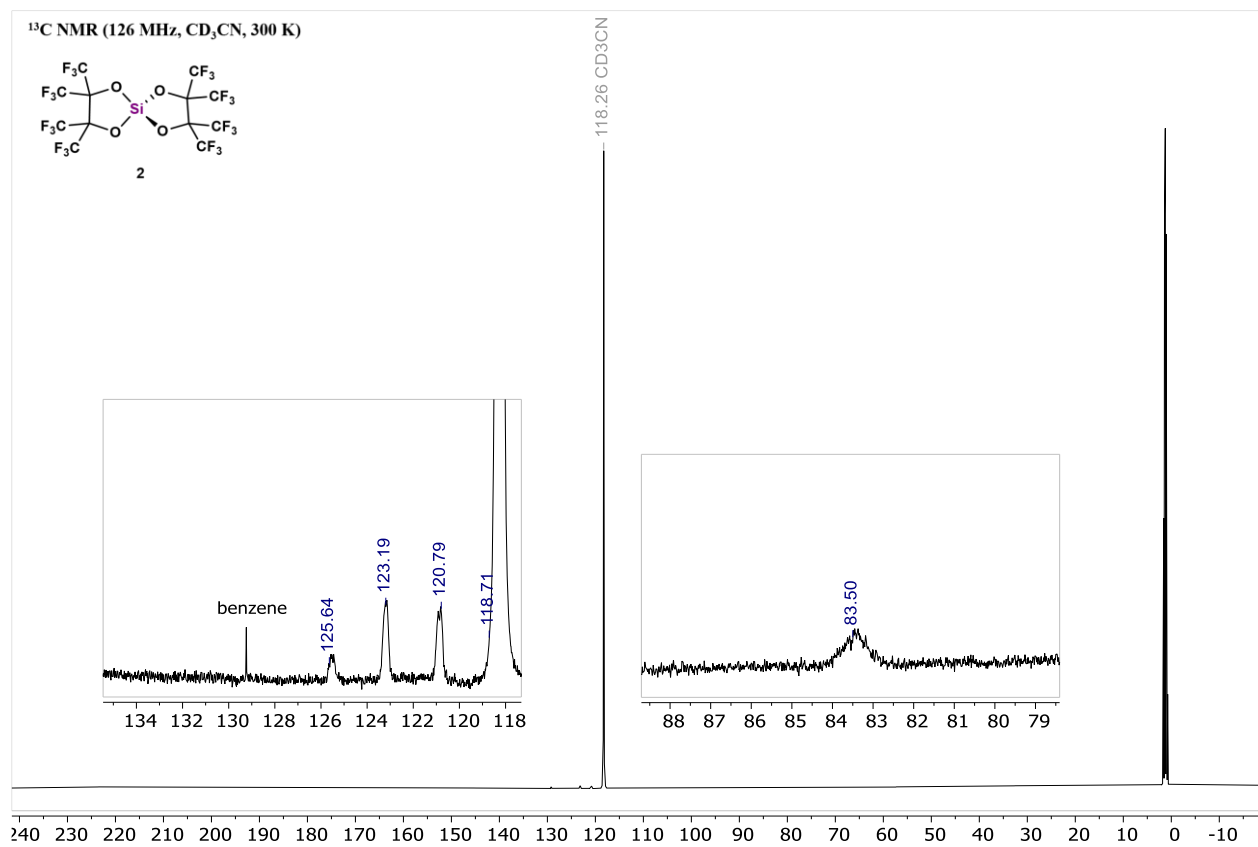

Figure S 50: <sup>13</sup>C NMR spectrum of 2 in CD<sub>3</sub>CN at 300 K.

<sup>19</sup>F NMR (377 MHz, CD<sub>3</sub>CN, 300 K)

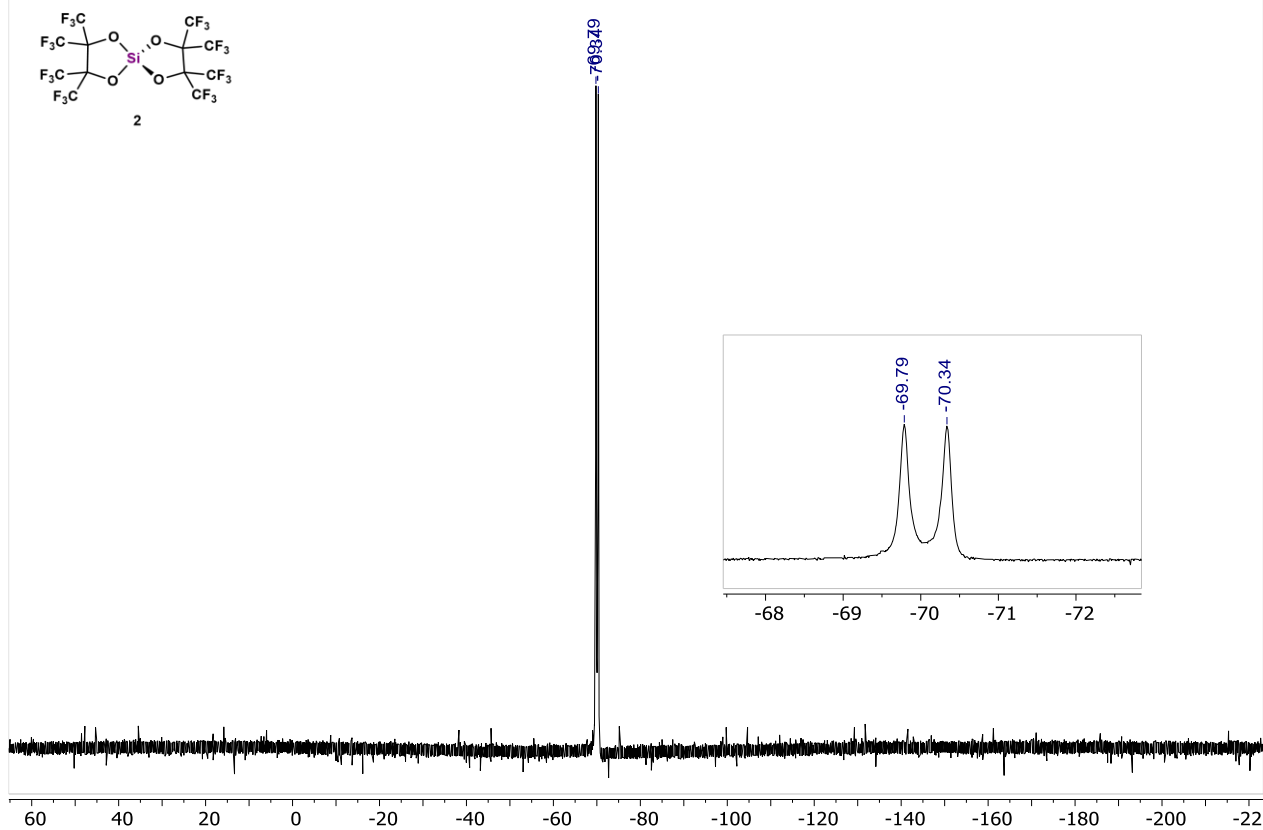

**Figure S 51:** <sup>19</sup>F NMR spectrum of **2** in CD<sub>3</sub>CN at 300 K.

<sup>29</sup>Si NMR (99 MHz, CD<sub>3</sub>CN, 300 K)

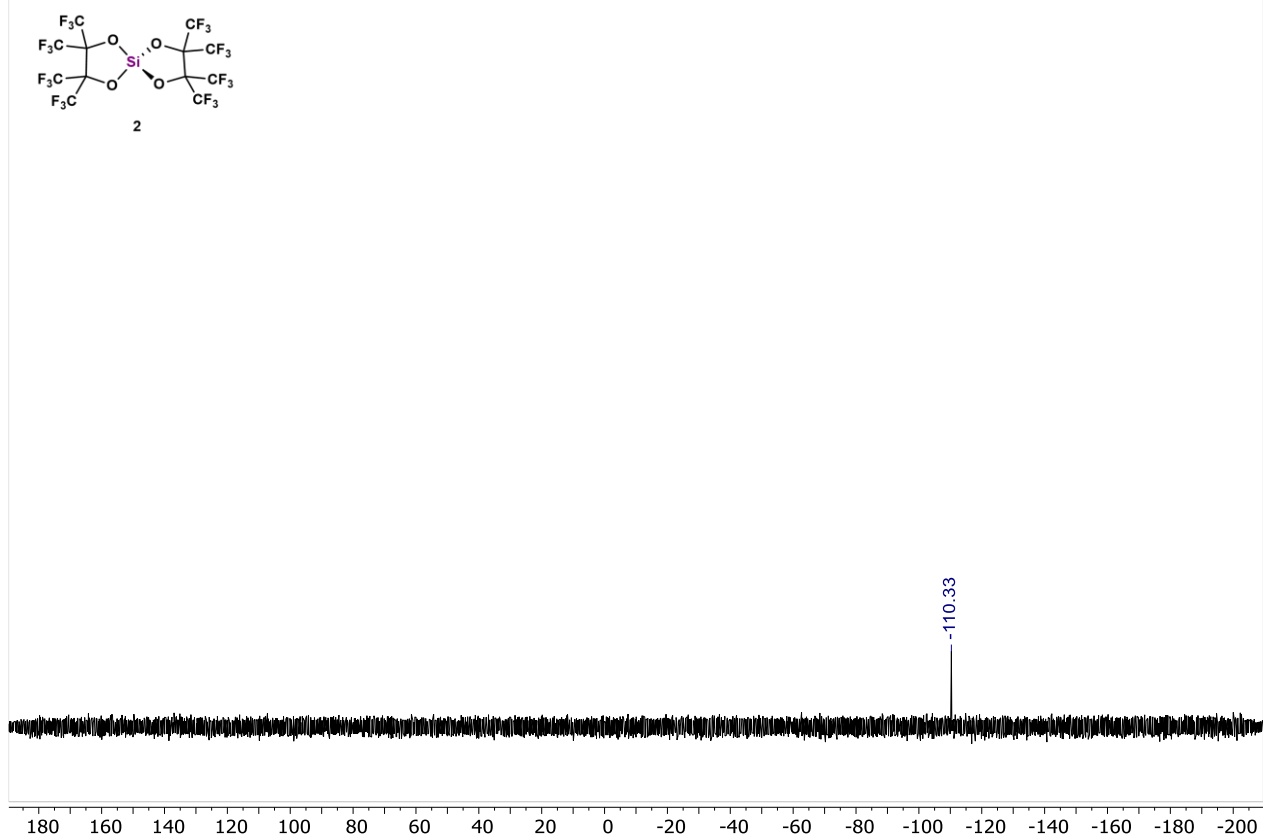

**Figure S 52:** <sup>29</sup>Si{<sup>1</sup>H} NMR spectrum of **2** in CD<sub>3</sub>CN at 300 K.

## 5.4 NMR spectra of [K·18-c-6][1-F]

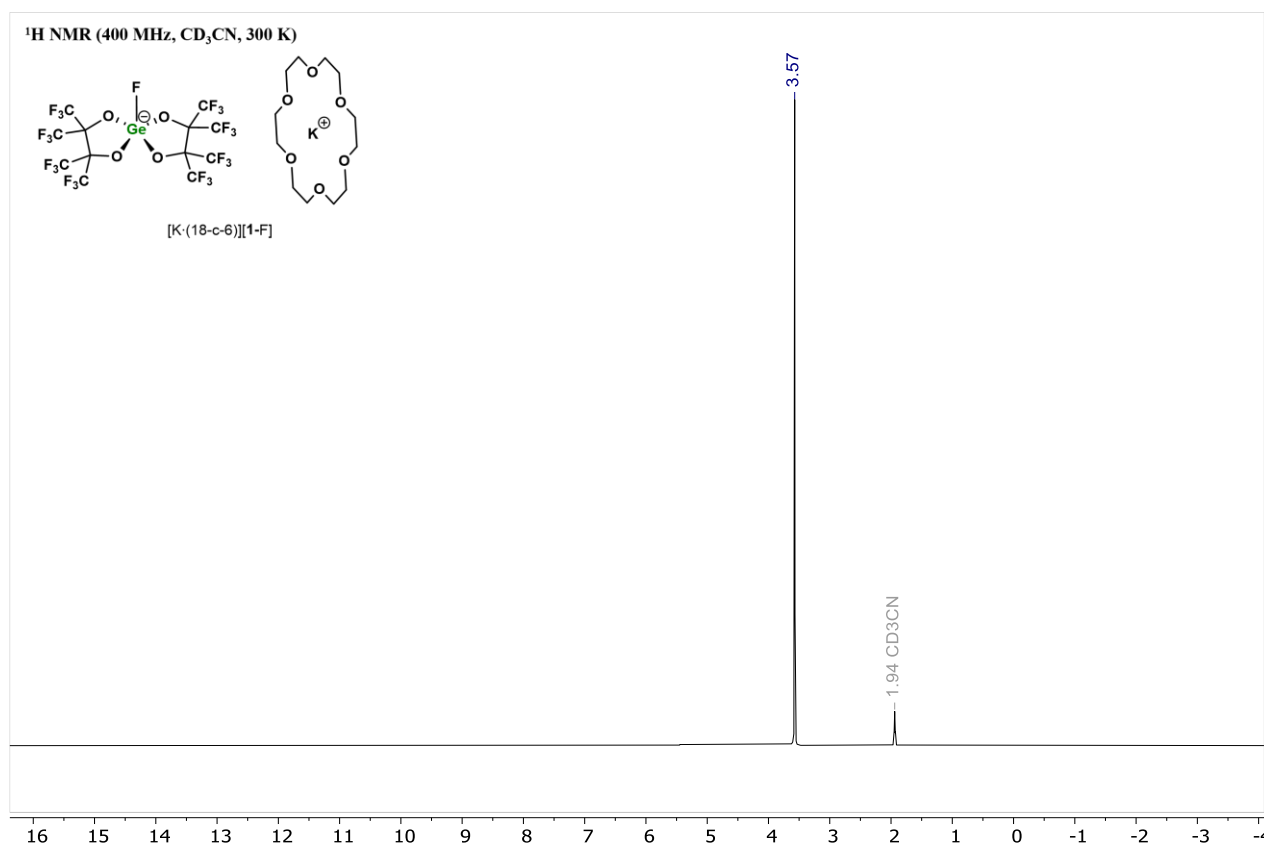

Figure S 53: <sup>1</sup>H NMR spectrum of [K·(18-c-6)][1-F] in CD<sub>3</sub>CN at 300 K.

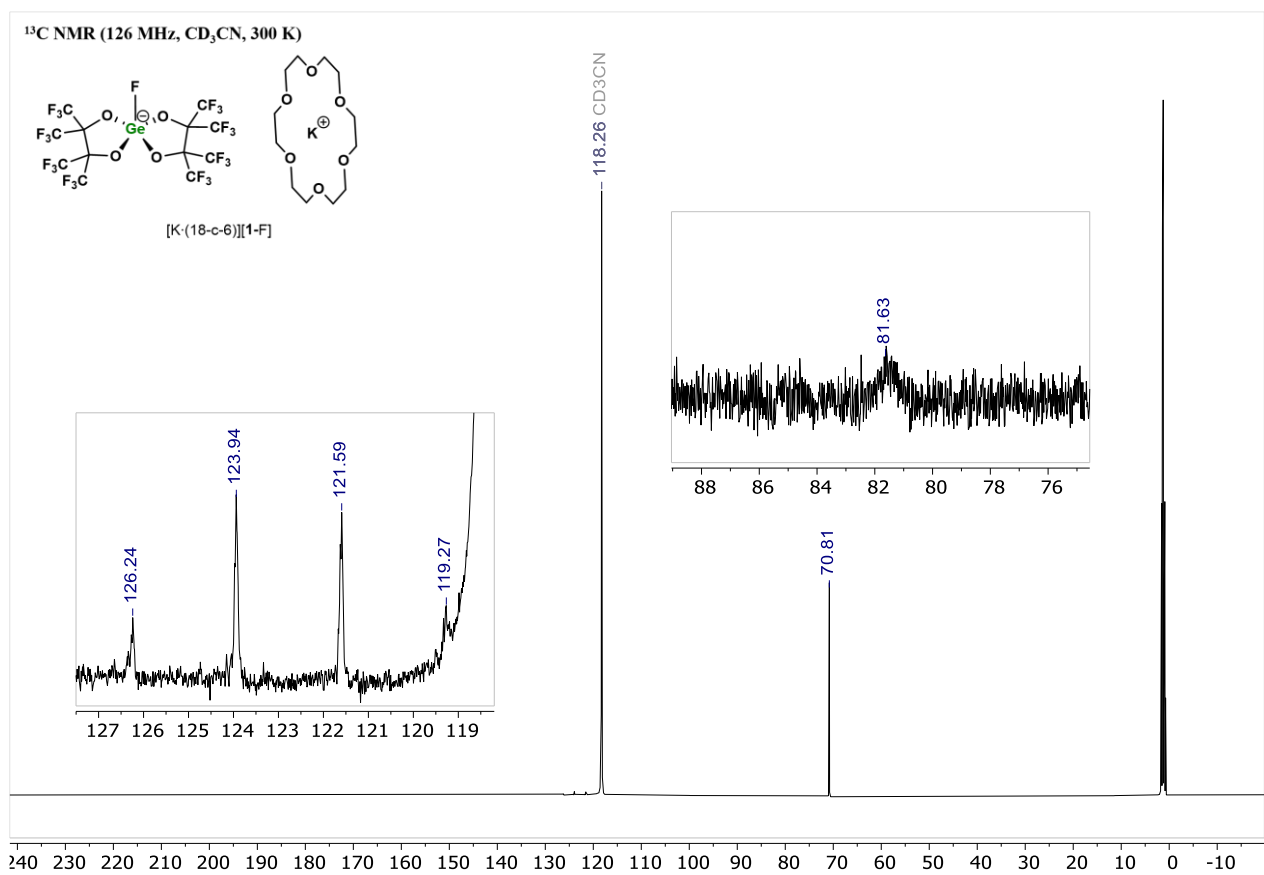

Figure S 54: <sup>13</sup>C NMR spectrum of [K·(18-c-6)][1-F] in CD<sub>3</sub>CN at 300 K.

<sup>19</sup>F NMR (377 MHz, CD<sub>3</sub>CN, 300 K)

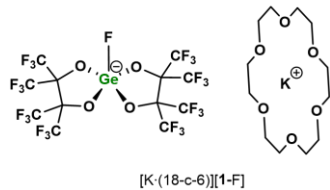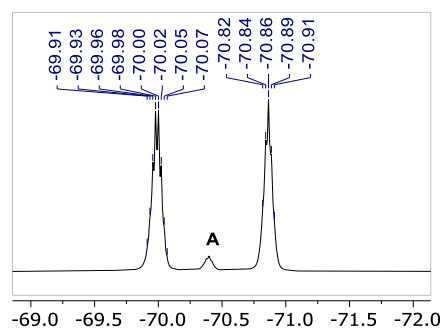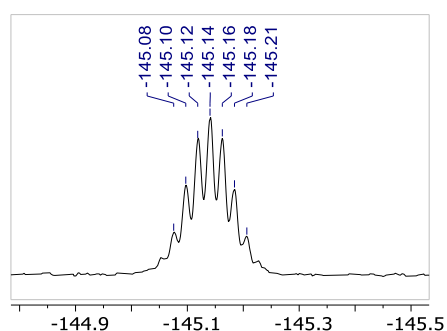

**Figure S 55:** <sup>19</sup>F NMR spectrum of [K·(18-c-6)][1-F] in CD<sub>3</sub>CN at 300 K. The spectrum additionally contains little amounts of an impurity (A) which could be identified as unreacted 1·MeCN.



## 5.5 NMR spectra of $[\text{Et}_3\text{Si}\cdot\text{MeCN}][\text{H-1}]$

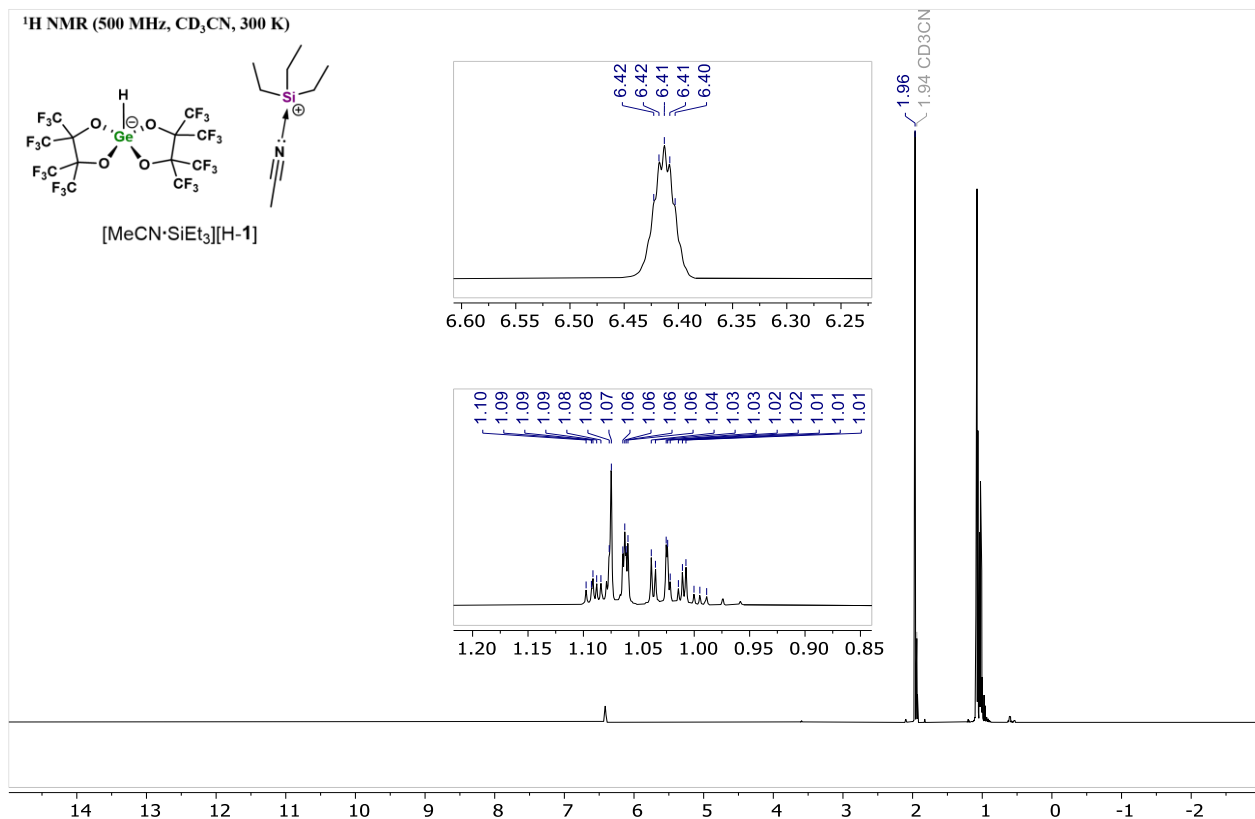

**Figure S 56:**  $^1\text{H}$  NMR spectrum of  $[\text{Et}_3\text{Si}\cdot\text{MeCN}][\text{H-1}]$  in  $\text{CD}_3\text{CN}$  at 300 K.

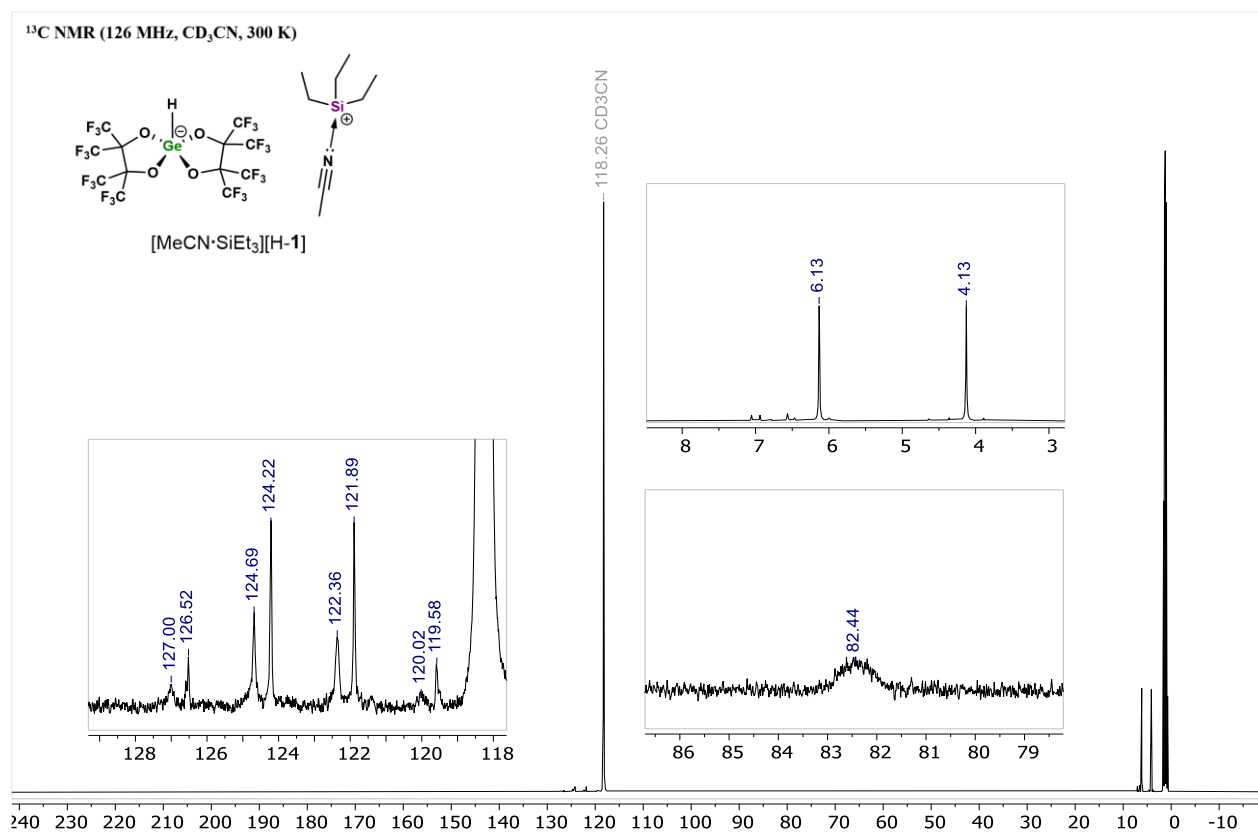

**Figure S 57:**  $^{13}\text{C}$  NMR spectrum of  $[\text{Et}_3\text{Si}\cdot\text{MeCN}][\text{H-1}]$  in  $\text{CD}_3\text{CN}$  at 300 K.

$^{19}\text{F}$  NMR (377 MHz,  $\text{CD}_3\text{CN}$ , 300 K)

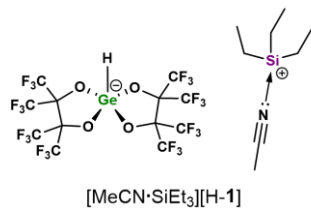

[MeCN·SiEt<sub>3</sub>][H-1]

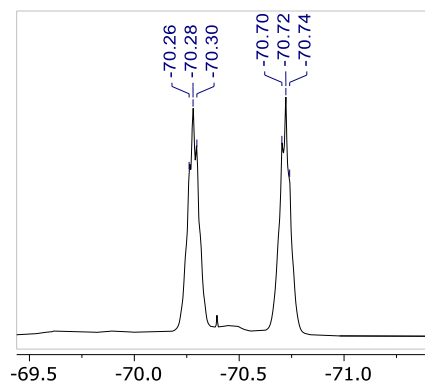

60 40 20 0 -20 -40 -60 -80 -100 -120 -140 -160 -180 -200 -220

**Figure S 58:**  $^{19}\text{F}$  NMR spectrum of  $[\text{Et}_3\text{Si}\cdot\text{MeCN}][\mathbf{1-F}]$  in  $\text{CD}_3\text{CN}$  at 300 K.

$^{29}\text{Si}$  NMR (99 MHz,  $\text{CD}_3\text{CN}$ , 300 K)

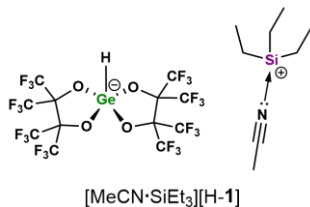

[MeCN·SiEt<sub>3</sub>][H-1]

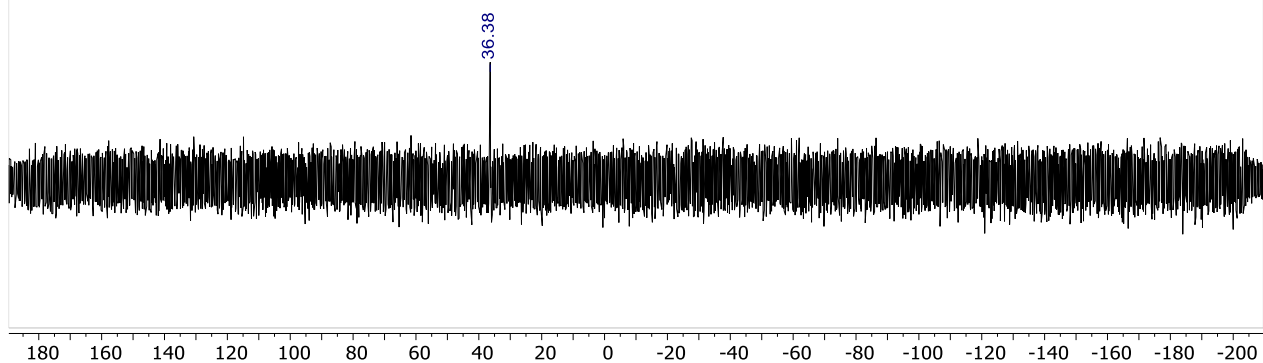

**Figure S 59:**  $^{29}\text{Si}\{^1\text{H}\}$  NMR spectrum of  $[\text{Et}_3\text{Si}\cdot\text{MeCN}][\mathbf{1-F}]$  in  $\text{CD}_3\text{CN}$  at 300 K.

## 5.6 NMR spectra of compound mixture 3 and 4

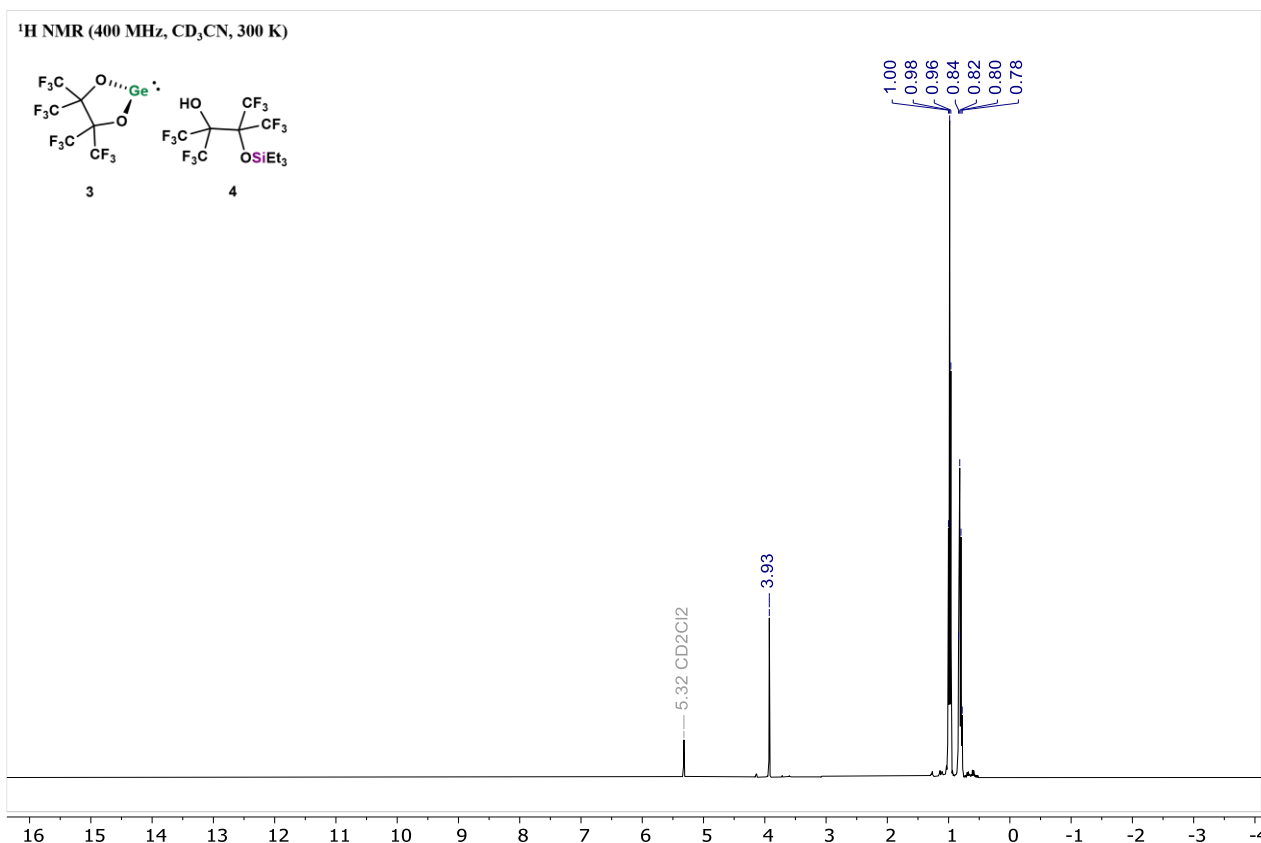

Figure S 60: <sup>1</sup>H NMR spectrum of **3** and **4** in CD<sub>2</sub>Cl<sub>2</sub> at 300 K.

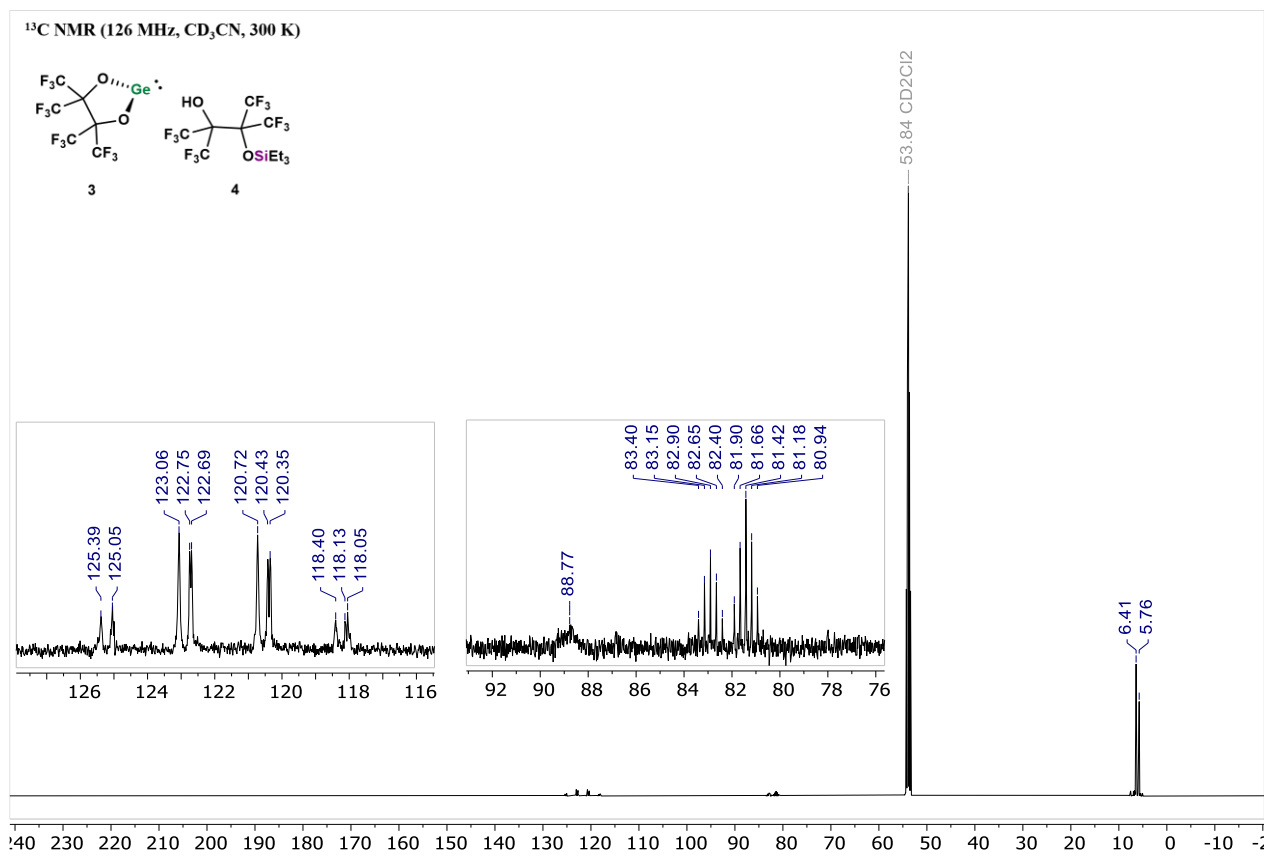

Figure S 61: <sup>13</sup>C NMR spectrum of **3** and **4** in CD<sub>2</sub>Cl<sub>2</sub> at 300 K.

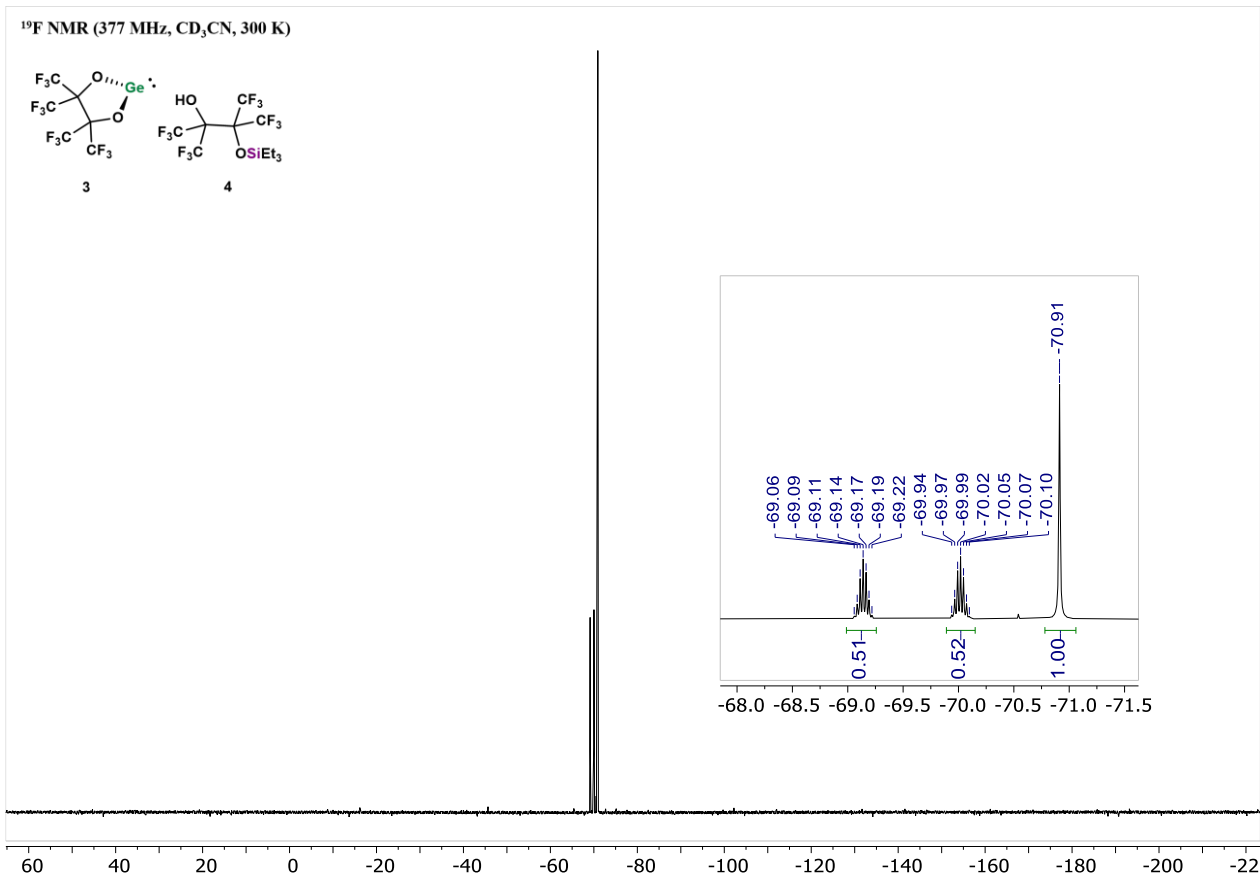

**Figure S 62:** <sup>19</sup>F NMR spectrum of **3** and **4** in CD<sub>2</sub>Cl<sub>2</sub> at 300 K.

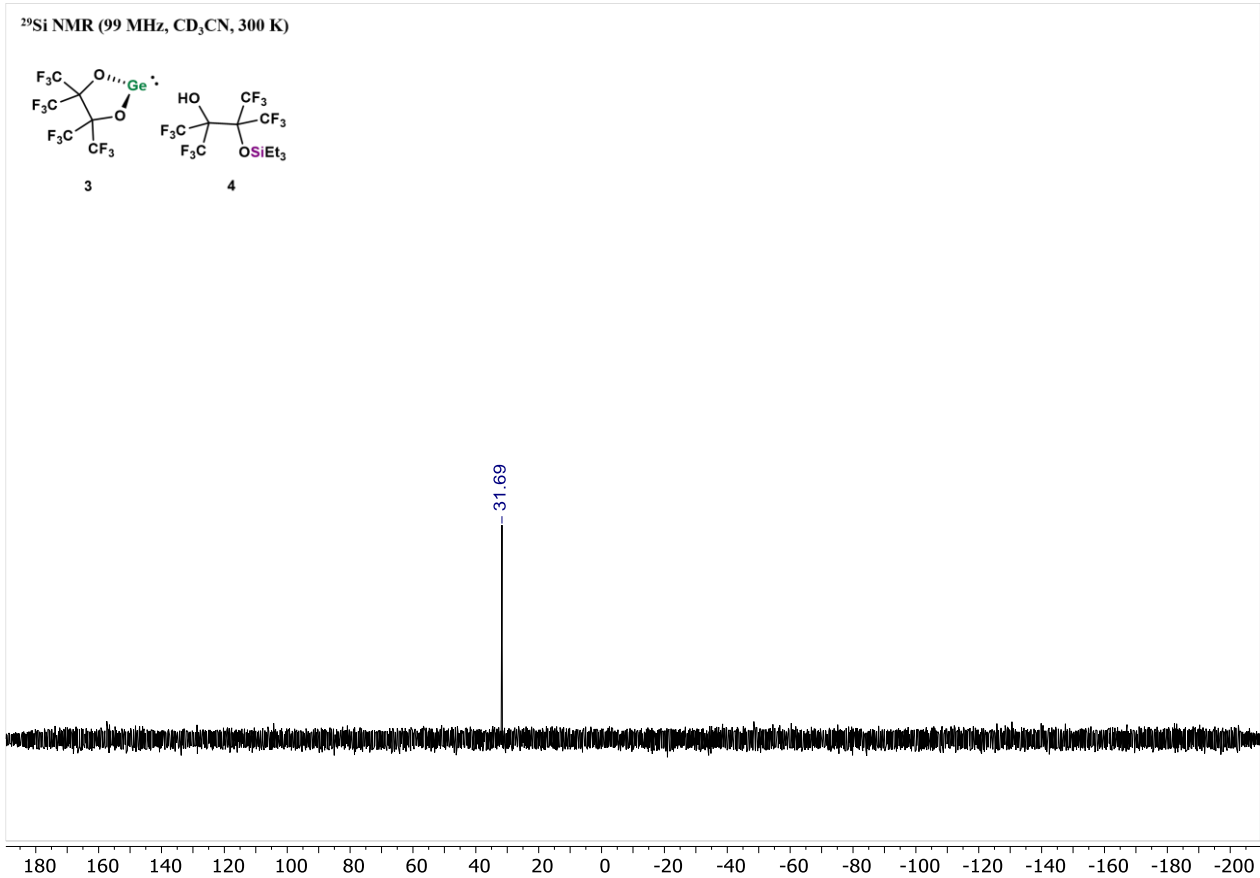

**Figure S 63:** <sup>29</sup>Si{<sup>1</sup>H} NMR spectrum of **3** and **4** in CD<sub>2</sub>Cl<sub>2</sub> at 300 K.

## 5.7 NMR spectra of 1,4-dioxane-coordinated germylene 3

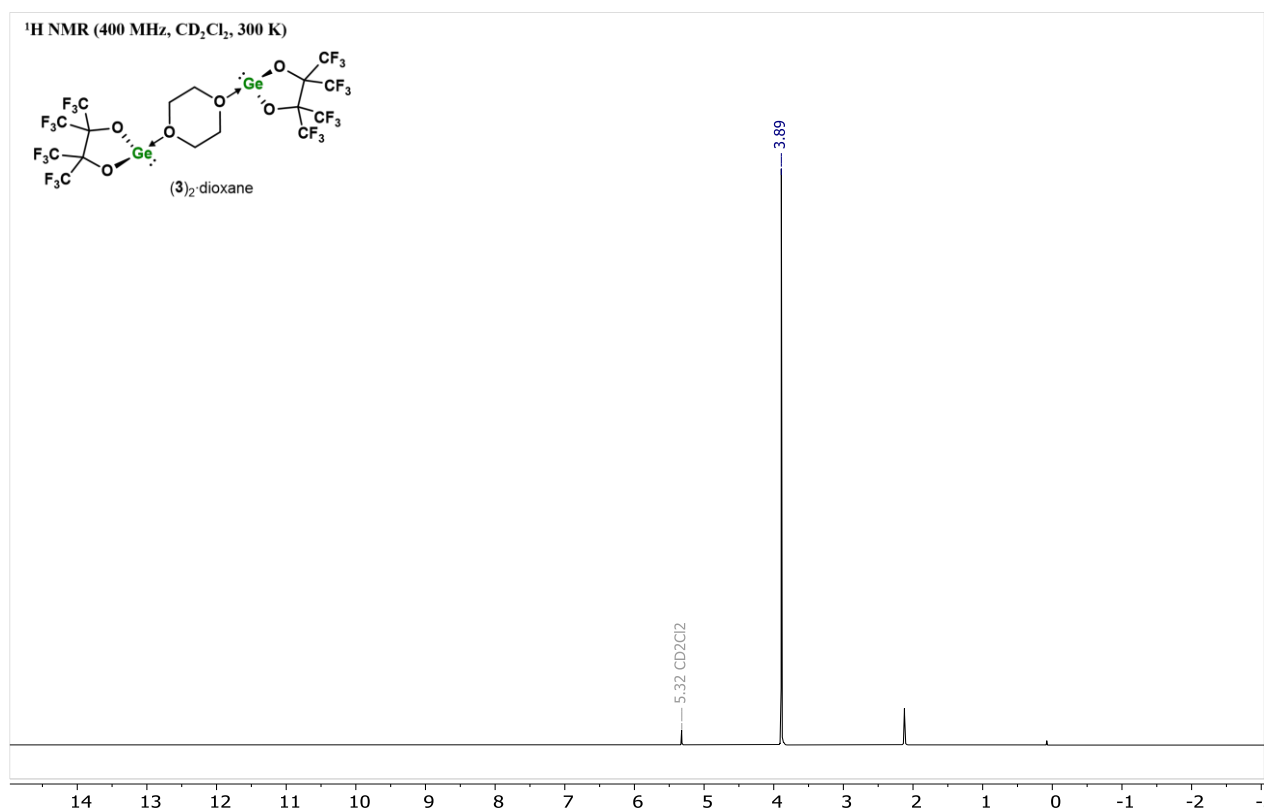

Figure S 64: <sup>1</sup>H NMR spectrum of (3)<sub>2</sub> dioxane in CD<sub>2</sub>Cl<sub>2</sub> at 300 K.

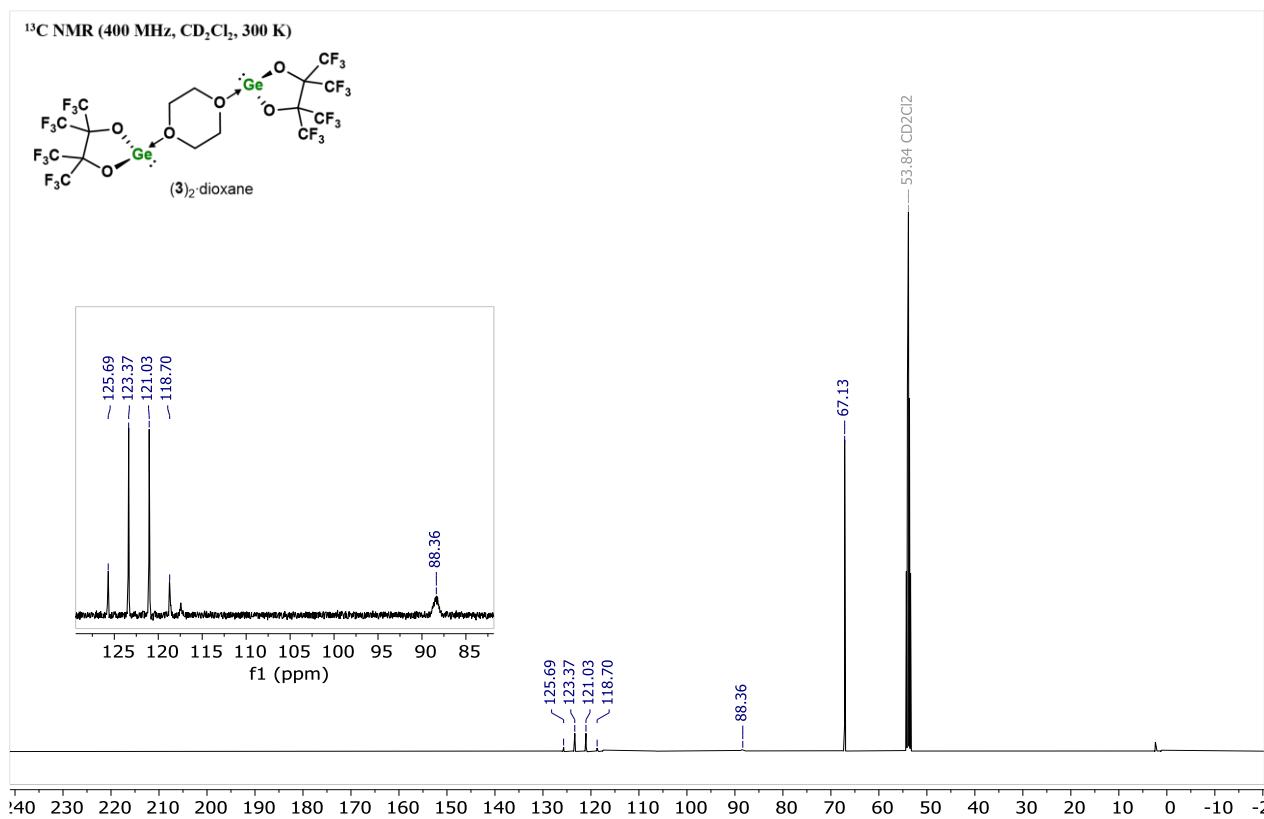

Figure S 65: <sup>13</sup>C NMR spectrum of (3)<sub>2</sub> dioxane in CD<sub>2</sub>Cl<sub>2</sub> at 300 K.

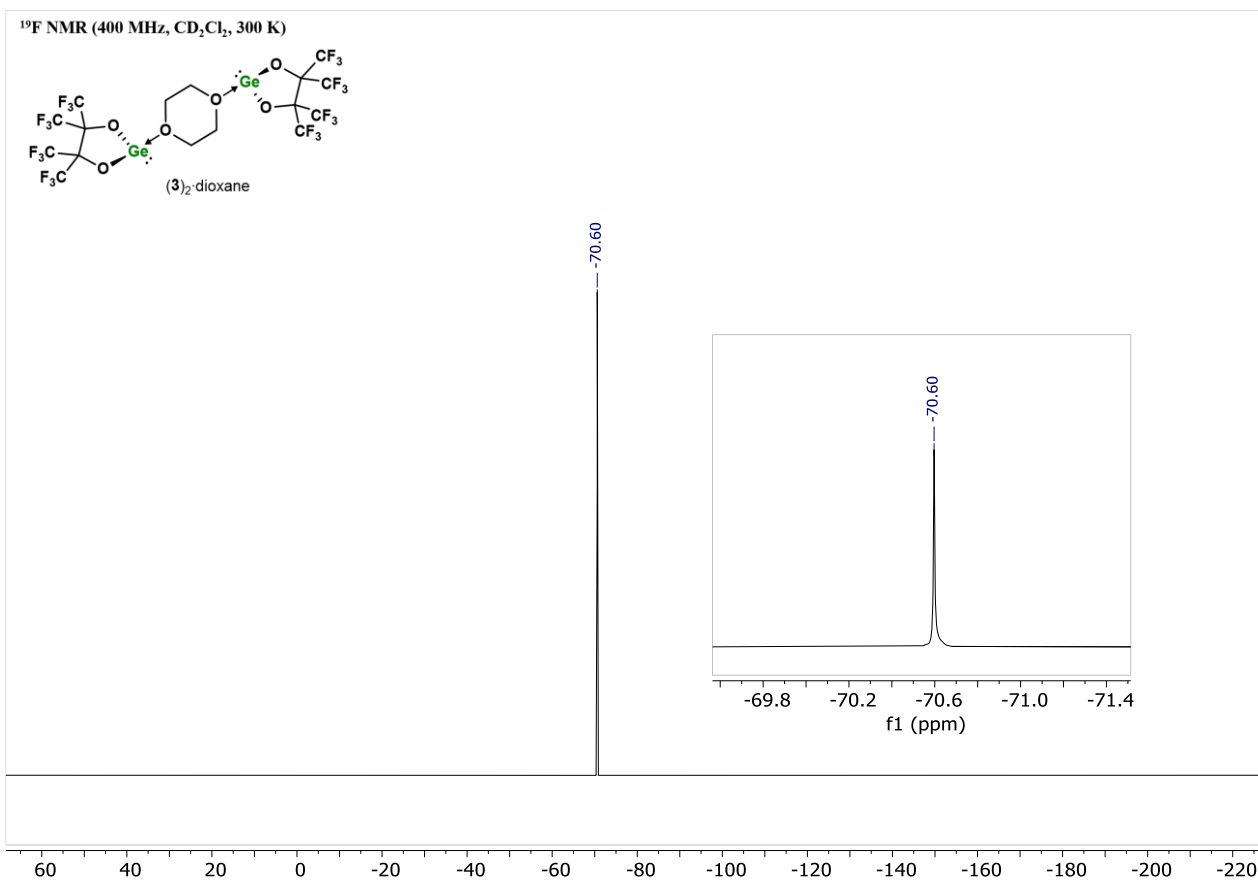

**Figure S 66:** <sup>19</sup>F NMR spectrum of (3)<sub>2</sub> dioxane in CD<sub>2</sub>Cl<sub>2</sub> at 300 K.

## 6 References

- [1] F. S. Tschernuth, T. Thorwart, L. Greb, F. Hanusch, S. Inoue, *Angew. Chem. Int. Ed.* **2021**, *60*, 25799-25803.
- [2] G. C. Welch, D. W. Stephan, *J. Am. Chem. Soc.* **2007**, *129*, 1880-1881.
- [3] Y. Soltani, L. C. Wilkins, R. L. Melen, *Angew. Chem. Int. Ed.* **2017**, *56*, 11995-11999.
- [4] M. Muhr, P. Heiß, M. Schütz, R. Bühler, C. Gemel, M. H. Linden, H. B. Linden, R. A. Fischer, *Dalton Trans.* **2021**, *50*, 9031-9036.
- [5] Bruker AXS Inc., Madison, Wisconsin, USA, **2015**.
- [6] SAINT, Version 8.40A ed., Bruker AXS Inc., Madison, Wisconsin, USA, **2016**.
- [7] SADABS, Version 2016/2, ed., Bruker AXS Inc., Madison, Wisconsin, USA, **2016**.
- [8] (a) L. J. Bourhis, O. V. Dolomanov, R. J. Gildea, J. A. K. Howard, H. Puschmann, *Acta Crystallogr., Sect. A* **2015**, *71*, 59-75; (b) O. V. Dolomanov, L. J. Bourhis, R. J. Gildea, J. A. K. Howard, H. Puschmann, *J. Appl. Crystallogr.* **2009**, *42*, 339-341; (c) G. M. Sheldrick, *Acta Crystallogr., Sect. C* **2015**, *71*, 3-8.
- [9] G. M. Sheldrick, University of Göttingen, Göttingen, Germany, **2014**.
- [10] C. B. Huebschle, G. M. Sheldrick, B. Dittrich, *J. Appl. Cryst.* **2011**, *44*, 1281.
- [11] G. M. Sheldrick, University of Göttingen, Göttingen, Germany, **1998**.
- [12] A. J. C. Wilson, *International Tables for Crystallography, Vol. C*, Kluwer Academic Publishers, Dordrecht, Netherlands **1992**.
- [13] (a) A. L. Spek, Utrecht University, Utrecht, Netherlands **2010**; (b) C. F. Macrae, I. Sovago, S. J. Cottrell, P. T. A. Galek, P. McCabe, E. Pidcock, M. Platings, G. P. Shields, J. S. Stevens, M. Towler, P. A. Wood, *J. Appl. Crystallogr.* **2020**, *53*, 226-235.
- [14] (a) X. Yuan, Y. Wang, *Angew. Chem. Int. Ed.* **2022**, *61*, e202203671; (b) N. Bartalucci, M. Bortoluzzi, S. Zacchini, G. Pampaloni, F. Marchetti, *Dalton Trans.* **2019**, *48*, 1574-1577.
- [15] A. T. Henry, D. A. R. Nanan, K. M. Baines, *Dalton Trans.* **2023**, *52*, 10363-10371.
- [16] R. J. Andrews, S. S. Chitnis, D. W. Stephan, *Chemical Communications* **2019**, *55*, 5599-5602.
- [17] F. Neese, *WIREs Comput. Mol. Sci.* **2022**, *12*, e1606.
- [18] C. Adamo, V. Barone, *The Journal of Chemical Physics* **1999**, *110*, 6158-6170.
- [19] (a) E. Caldeweyher, J.-M. Mewes, S. Ehlert, S. Grimme, *Physical Chemistry Chemical Physics* **2020**, *22*, 8499-8512; (b) E. Caldeweyher, S. Ehlert, A. Hansen, H. Neugebauer, S. Spicher, C. Bannwarth, S. Grimme, *The Journal of Chemical Physics* **2019**, *150*; (c) E. Caldeweyher, C. Bannwarth, S. Grimme, *The Journal of Chemical Physics* **2017**, *147*.
- [20] F. Weigend, R. Ahlrichs, *Physical Chemistry Chemical Physics* **2005**, *7*, 3297-3305.
- [21] F. Weigend, *Physical Chemistry Chemical Physics* **2006**, *8*, 1057-1065.
- [22] (a) S. Grimme, S. Ehrlich, L. Goerigk, *J. Comput. Chem.* **2011**, *32*, 1456-1465; (b) S. Grimme, J. Antony, S. Ehrlich, H. Krieg, *The Journal of Chemical Physics* **2010**, *132*.
- [23] (a) A. K. Wilson, D. E. Woon, K. A. Peterson, T. H. Dunning, Jr., *The Journal of Chemical Physics* **1999**, *110*, 7667-7676; (b) R. A. Kendall, T. H. Dunning, Jr., R. J. Harrison, *The Journal of Chemical Physics* **1992**, *96*, 6796-6806.
- [24] (a) P. Erdmann, L. Greb, *ChemPhysChem* **2021**, *22*, 935-943; (b) P. Erdmann, J. Leitner, J. Schwarz, L. Greb, *ChemPhysChem* **2020**, *21*, 987-994.

## 7 Appendix A

-----  
Calculated energies and coordinates of **1** at PBE0-D4(CPCM=DCM)/def2-TZVP

Electronic energy ... -5229.60383427 Eh  
Total Enthalpy ... -5229.40102877 Eh  
Final Gibbs free energy ... -5229.50026724 Eh

CARTESIAN COORDINATES (ANGSTROEM)

Ge 4.685199 14.396301 8.765874  
O 3.400303 14.407805 7.561079  
O 5.968291 14.387158 7.558922  
O 4.503637 13.123260 9.970294  
O 4.867964 15.666865 9.972762  
C 3.918783 14.673253 6.291482  
C 5.447681 14.122588 6.289949  
C 2.933721 14.010537 5.270178  
F 2.726050 12.736069 5.563454  
F 3.400052 14.098629 4.031885  
F 1.750827 14.612131 5.307761  
C 3.834705 16.236199 6.149355  
F 4.150103 16.662887 4.937730  
F 4.654749 16.797439 7.045402  
F 2.617044 16.666525 6.437658  
C 5.531834 12.559691 6.146527  
F 6.750730 12.129629 6.429950  
F 5.211964 12.133313 4.936010  
F 4.715328 11.997694 7.045382  
C 6.430489 14.786252 5.267081  
F 7.614271 14.186346 5.303116  
F 6.636861 16.061142 5.559341  
F 5.962245 14.696999 4.029548  
C 4.844835 13.598852 11.239649  
C 4.527968 15.188572 11.241476  
C 4.045778 12.726153 12.265204  
F 2.756748 12.695973 11.965633  
F 4.188409 13.182577 13.502119  
F 4.481358 11.473039 12.238279  
C 6.377693 13.284298 11.385876  
F 6.832931 13.511492 12.607785  
F 7.064497 14.028300 10.512440  
F 6.625161 12.022199 11.075366  
C 2.995291 15.502877 11.390005  
F 2.307268 14.760211 10.516445  
F 2.747454 16.765457 11.081687  
F 2.541760 15.273873 12.612236  
C 5.327789 16.058812 12.268524  
F 4.890622 17.311460 12.247018  
F 6.616231 16.091654 11.966783  
F 5.187776 15.597790 13.504033

-----  
Calculated energies and coordinates of **1** at PBE0-D4(CPCM=acetonitrile)/def2-TZVP level of theory

Electronic energy ... -5229.60411347 Eh  
Total Enthalpy ... -5229.40144558 Eh  
Final Gibbs free energy ... -5229.50070480 Eh

CARTESIAN COORDINATES (ANGSTROEM)

Ge 4.685208 14.396305 8.765831  
O 3.400375 14.407608 7.560853  
O 5.968231 14.387365 7.558691  
O 4.503546 13.123351 9.970455  
O 4.868078 15.666779 9.972926  
C 3.918751 14.673209 6.291305  
C 5.447717 14.122640 6.289769  
C 2.933685 14.010358 5.270076  
F 2.726365 12.735773 5.563236  
F 3.399694 14.098727 4.031695  
F 1.750524 14.611511 5.308049  
C 3.834579 16.236193 6.149051  
F 4.150346 16.662657 4.937426  
F 4.654262 16.797565 7.045179

F 2.616702 16.666361 6.436814  
C 5.531953 12.559704 6.146226  
F 6.751059 12.129792 6.429107  
F 5.211703 12.133548 4.935714  
F 4.715805 11.997585 7.045166  
C 6.430526 14.786426 5.266964  
F 7.614566 14.186940 5.303368  
F 6.636575 16.061428 5.559107  
F 5.962584 14.696905 4.029350  
C 4.844797 13.598832 11.239770  
C 4.528018 15.188596 11.241595  
C 4.045565 12.726174 12.265220  
F 2.756451 12.696478 11.965869  
F 4.188539 13.182175 13.502250  
F 4.480579 11.472822 12.237822  
C 6.377681 13.284214 11.386250  
F 6.832579 13.511656 12.608282  
F 7.064600 14.027991 10.512912  
F 6.625052 12.021961 11.076178  
C 2.995313 15.502957 11.390361  
F 2.307189 14.760504 10.516897  
F 2.747567 16.765685 11.082467  
F 2.542109 15.273711 12.612708  
C 5.327996 16.058793 12.268554  
F 4.891368 17.311672 12.246598  
F 6.616521 16.091182 11.967037  
F 5.187644 15.598168 13.504173

-----  
Calculated energies and coordinates of **1** at PBE0-D4(CPCM=benzene)/def2-TZVP level of theory

Electronic energy ... -5229.60274820 Eh  
Total Enthalpy ... -5229.39943902 Eh  
Final Gibbs free energy ... -5229.49860457 Eh

CARTESIAN COORDINATES (ANGSTROEM)

Ge 4.685159 14.396278 8.766037  
O 3.400027 14.408503 7.561928  
O 5.968514 14.386406 7.559797  
O 4.503965 13.122915 9.969689  
O 4.867537 15.667182 9.972142  
C 3.918895 14.673396 6.292163  
C 5.447549 14.122414 6.290641  
C 2.933897 14.011170 5.270558  
F 2.724846 12.737162 5.564280  
F 3.401474 14.098159 4.032600  
F 1.752007 14.614445 5.306566  
C 3.835142 16.236194 6.150513  
F 4.149021 16.663698 4.938822  
F 4.656629 16.796962 7.046130  
F 2.618322 16.667110 6.440935  
C 5.531425 12.559665 6.147664  
F 6.749502 12.129044 6.433206  
F 5.213111 12.132489 4.937059  
F 4.713488 11.998092 7.046072  
C 6.430309 14.785644 5.267529  
F 7.613125 14.184130 5.302067  
F 6.637957 16.060091 5.560250  
F 5.960903 14.697465 4.030303  
C 4.844963 13.598921 11.239188  
C 4.527789 15.188490 11.241016  
C 4.046565 12.726069 12.265129  
F 2.757850 12.694010 11.964770  
F 4.187900 13.184070 13.501630  
F 4.484300 11.473848 12.240018  
C 6.377710 13.284568 11.384469  
F 6.834191 13.510772 12.605975  
F 7.064131 14.029418 10.510749  
F 6.625511 12.023050 11.072317  
C 2.995232 15.502637 11.388668  
F 2.307528 14.759179 10.514830  
F 2.747098 16.764657 11.078757  
F 2.540502 15.274615 12.610514  
C 5.327033 16.058878 12.268384  
F 4.887846 17.310671 12.248584



F 6.615158 16.093442 11.965846  
 F 5.188286 15.596394 13.503507

-----  
 Calculated energies and coordinates of **1** at PBE0-D3/def2-TZVPP

Electronic energy ... -5229.58926089 Eh  
 Total Enthalpy ... -5229.38527772 Eh  
 Final Gibbs free energy ... -5229.48435440 Eh

CARTESIAN COORDINATES (ANGSTROEM)

Ge 4.684919 14.396541 8.766367  
 O 3.399086 14.412018 7.562320  
 O 5.969183 14.382601 7.560445  
 O 4.506453 13.121920 9.969751  
 O 4.864792 15.668539 9.972346  
 C 3.918862 14.674686 6.291791  
 C 5.447532 14.121081 6.290399  
 C 2.933239 14.012655 5.269991  
 F 2.722095 12.739530 5.565186  
 F 3.402303 14.097044 4.032190  
 F 1.752695 14.618443 5.303234  
 C 3.836937 16.237708 6.149144  
 F 4.149339 16.664890 4.936867  
 F 4.661179 16.798339 7.043268  
 F 2.621726 16.671221 6.441714  
 C 5.528933 12.558146 6.146174  
 F 6.745049 12.124259 6.434428  
 F 5.212506 12.131806 4.934668  
 F 4.707386 11.996959 7.042419  
 C 6.431544 14.783798 5.267429  
 F 7.612518 14.178800 5.299191  
 F 6.642368 16.057085 5.562082  
 F 5.960840 14.699001 4.030238  
 C 4.846105 13.598709 11.240026  
 C 4.526538 15.188882 11.241986  
 C 4.048964 12.723829 12.266021  
 F 2.760739 12.687565 11.964553  
 F 4.187659 13.183269 13.502525  
 F 4.491165 11.473290 12.242906  
 C 6.379292 13.285847 11.385148  
 F 6.836488 13.510751 12.606599  
 F 7.065632 14.032787 10.512081  
 F 6.629081 12.025397 11.070870  
 C 2.993620 15.501896 11.389709  
 F 2.305667 14.756853 10.516345  
 F 2.743842 16.763008 11.078032  
 F 2.538224 15.275022 12.611489  
 C 5.324900 16.060913 12.269420  
 F 4.881691 17.311181 12.251892  
 F 6.612498 16.099226 11.965588  
 F 5.188811 15.596806 13.504466

-----  
 Calculated energies and coordinates of **1-MeCN** at PBE0-D4(CPCM=DCM)/def2-TZVP level of theory

Electronic energy ... -5362.28957277 Eh  
 Total Enthalpy ... -5362.03518325 Eh  
 Final Gibbs free energy ... -5362.14349099 Eh

CARTESIAN COORDINATES (ANGSTROEM)

Ge 7.941027 6.425840 12.129435  
 F 10.650589 5.585874 13.222187  
 F 10.003093 3.775457 14.131377  
 F 10.993176 5.254610 15.333120  
 F 8.275080 3.786967 15.924550  
 F 8.797273 5.563325 17.009722  
 F 6.861235 5.370436 16.083213  
 F 11.097633 7.784765 14.388082  
 F 10.253484 7.702834 16.369903  
 F 9.880015 9.383743 15.089405  
 F 7.501127 7.967676 16.520499  
 F 7.406383 9.306875 14.843194  
 F 6.366733 7.456059 14.750052

F 9.838419 3.420537 9.189356  
 F 11.086210 4.991779 9.900026  
 F 10.261287 5.091347 7.910933  
 F 6.366974 5.426940 9.495620  
 F 7.505170 4.888682 7.735565  
 F 7.366022 3.553359 9.412842  
 F 11.046699 7.522922 8.947431  
 F 10.681527 7.203471 11.056494  
 F 10.081800 9.026340 10.139616  
 F 8.858120 7.263922 7.255576  
 F 6.919424 7.499549 8.166545  
 F 8.365936 9.052019 8.335627  
 O 7.912244 5.318295 13.587399  
 O 8.672917 7.679395 13.196825  
 O 8.652723 5.154543 11.069285  
 O 7.952680 7.532476 10.670618  
 N 6.014015 6.451158 12.121214  
 C 8.720782 5.731518 14.614932  
 C 8.746126 7.355197 14.536179  
 C 8.746106 5.475172 9.730490  
 C 8.758984 7.099198 9.649744  
 C 10.127604 5.081240 14.339260  
 C 8.154227 5.112732 15.936520  
 C 10.021270 8.059976 15.110325  
 C 7.486580 8.027801 15.192919  
 C 10.010057 4.740717 9.168702  
 C 7.477774 4.830068 9.062944  
 C 10.178203 7.717680 9.934794  
 C 8.216496 7.729188 8.323374  
 C 4.871807 6.456613 12.108538  
 C 3.444045 6.465372 12.092814  
 H 3.099708 6.220020 11.085471  
 H 3.095965 7.462334 12.373813  
 H 3.076746 5.725778 12.807771

-----  
 Calculated energies and coordinates of **1-MeCN** at PBE0-D4(CPCM=acetonitrile)/def2-TZVP level of theory

Electronic energy ... -5362.29230028 Eh  
 Total Enthalpy ... -5362.03809409 Eh  
 Final Gibbs free energy ... -5362.14640094 Eh

CARTESIAN COORDINATES (ANGSTROEM)

Ge 7.930206 6.422622 12.129657  
 F 10.652518 5.589092 13.218577  
 F 10.010828 3.777110 14.128164  
 F 10.998191 5.259113 15.328957  
 F 8.286886 3.783436 15.924501  
 F 8.806611 5.561343 17.008514  
 F 6.868719 5.362555 16.087213  
 F 11.093057 7.789951 14.381337  
 F 10.253640 7.706748 16.364935  
 F 9.871969 9.385565 15.084002  
 F 7.502475 7.961833 16.522945  
 F 7.398174 9.300596 14.845654  
 F 6.364201 7.446211 14.756276  
 F 9.839248 3.419613 9.194039  
 F 11.085562 4.991525 9.905478  
 F 10.263986 5.089612 7.915064  
 F 6.367163 5.425837 9.491312  
 F 7.509609 4.888113 7.733932  
 F 7.366787 3.552282 9.410692  
 F 11.046778 7.523820 8.951148  
 F 10.680849 7.202661 11.059558  
 F 10.080360 9.025752 10.144221  
 F 8.863042 7.264189 7.257320  
 F 6.922181 7.498763 8.163889  
 F 8.367666 9.051632 8.337146  
 O 7.914313 5.313411 13.588064  
 O 8.665882 7.676754 13.195626  
 O 8.649985 5.153681 11.070542  
 O 7.950898 7.531590 10.670971  
 N 6.010001 6.444837 12.120900  
 C 8.723110 5.729491 14.613649  
 C 8.742881 7.353154 14.534762

|   |           |          |           |
|---|-----------|----------|-----------|
| C | 8.745315  | 5.474331 | 9.731986  |
| C | 8.758339  | 7.098337 | 9.651577  |
| C | 10.131579 | 5.083612 | 14.336110 |
| C | 8.161588  | 5.109088 | 15.936818 |
| C | 10.016858 | 8.062091 | 15.105704 |
| C | 7.482637  | 8.021439 | 15.195072 |
| C | 10.010099 | 4.739996 | 9.172598  |
| C | 7.478119  | 4.829513 | 9.061562  |
| C | 10.177202 | 7.716942 | 9.938149  |
| C | 8.218308  | 7.728491 | 8.324043  |
| C | 4.867424  | 6.457451 | 12.108450 |
| C | 3.440968  | 6.476778 | 12.011577 |
| H | 3.096587  | 6.228996 | 11.084651 |
| H | 3.101154  | 7.478342 | 12.366940 |
| H | 3.067547  | 5.743499 | 12.810017 |

-----  
 Calculated energies and coordinates of **1-MeCN** at PBE0-D4(CPCM=benzene)/def2-TZVP level of theory

|                         |     |                   |
|-------------------------|-----|-------------------|
| Electronic energy       | ... | -5362.27989486 Eh |
| Total Enthalpy          | ... | -5362.02487581 Eh |
| Final Gibbs free energy | ... | -5362.13407019 Eh |

CARTESIAN COORDINATES (ANGSTROEM)

|    |           |          |           |
|----|-----------|----------|-----------|
| Ge | 7.979426  | 6.424732 | 12.128480 |
| F  | 10.649927 | 5.576141 | 13.235244 |
| F  | 9.991239  | 3.767957 | 14.142598 |
| F  | 10.981727 | 5.242783 | 15.348469 |
| F  | 8.251139  | 3.788144 | 15.925208 |
| F  | 8.767469  | 5.563868 | 17.013445 |
| F  | 6.840568  | 5.376560 | 16.066835 |
| F  | 11.105869 | 7.771797 | 14.411163 |
| F  | 10.247176 | 7.687402 | 16.387079 |
| F  | 9.890646  | 9.374289 | 15.110198 |
| F  | 7.490642  | 7.974244 | 16.512473 |
| F  | 7.419747  | 9.312157 | 14.833506 |
| F  | 6.370072  | 7.468114 | 14.731497 |
| F  | 9.851700  | 3.429953 | 9.165345  |
| F  | 11.096649 | 5.004028 | 9.876352  |
| F  | 10.258730 | 5.108506 | 7.892552  |
| F  | 6.371651  | 5.413639 | 9.512165  |
| F  | 7.496644  | 4.884165 | 7.740782  |
| F  | 7.381825  | 3.547172 | 9.418031  |
| F  | 11.037518 | 7.536977 | 8.933571  |
| F  | 10.681411 | 7.211462 | 11.044070 |
| F  | 10.070029 | 9.033519 | 10.131563 |
| F  | 8.832608  | 7.264837 | 7.250374  |
| F  | 6.901702  | 7.493844 | 8.179523  |
| F  | 8.344869  | 9.051491 | 8.333943  |
| O  | 7.912341  | 5.321924 | 13.583823 |
| O  | 8.691794  | 7.679396 | 13.201197 |
| O  | 8.672826  | 5.153258 | 11.063041 |
| O  | 7.952376  | 7.527563 | 10.671940 |
| N  | 6.027545  | 6.449310 | 12.120395 |
| C  | 8.716637  | 5.729745 | 14.618866 |
| C  | 8.752658  | 7.353077 | 14.541323 |
| C  | 8.754503  | 5.476781 | 9.723523  |
| C  | 8.756331  | 7.100588 | 9.644481  |
| C  | 10.121394 | 5.071844 | 14.350489 |
| C  | 8.135509  | 5.113381 | 15.934614 |
| C  | 10.027490 | 8.050406 | 15.126988 |
| C  | 7.492160  | 8.034322 | 15.186062 |
| C  | 10.018890 | 4.750354 | 9.150381  |
| C  | 7.485297  | 4.823314 | 9.067058  |
| C  | 10.173144 | 7.727043 | 9.924616  |
| C  | 8.200778  | 7.729037 | 8.323417  |
| C  | 4.886662  | 6.455184 | 12.111010 |
| C  | 3.455042  | 6.465799 | 12.099322 |
| H  | 3.104217  | 6.112203 | 11.127500 |
| H  | 3.107792  | 7.487450 | 12.268202 |
| H  | 3.085131  | 5.812042 | 12.891586 |

-----  
 Calculated energies and coordinates of **B[H-1]** at PBE0-D4(CPCM=DCM)/def2-TZVP level of theory

|                         |     |                   |
|-------------------------|-----|-------------------|
| Electronic energy       | ... | -5230.38307456 Eh |
| Total Enthalpy          | ... | -5230.17303971 Eh |
| Final Gibbs free energy | ... | -5230.27259092 Eh |

CARTESIAN COORDINATES (ANGSTROEM)

|    |           |           |           |
|----|-----------|-----------|-----------|
| Ge | 1.084469  | -2.222684 | -0.633854 |
| O  | -0.173615 | -1.450155 | -1.721323 |
| O  | 1.787132  | -2.932278 | -2.238259 |
| O  | 0.881109  | -3.926621 | 0.017242  |
| O  | 0.054349  | -1.710609 | 0.866204  |
| C  | 0.116479  | -1.430656 | -3.059612 |
| C  | 1.030650  | -2.750814 | -3.350123 |
| C  | -1.245689 | -1.337826 | -3.822472 |
| F  | -2.090048 | -2.290435 | -3.448007 |
| F  | -1.087875 | -1.416225 | -5.143006 |
| F  | -1.858938 | -0.180207 | -3.568047 |
| C  | 0.895750  | -0.088022 | -3.308534 |
| F  | 1.095826  | 0.178226  | -4.599145 |
| F  | 2.077912  | -0.107666 | -2.691840 |
| F  | 0.232100  | 0.943606  | -2.789161 |
| C  | 0.175547  | -4.058817 | -3.522639 |
| F  | 0.959134  | -5.135558 | -3.471789 |
| F  | -0.490835 | -4.110013 | -4.680300 |
| F  | -0.694780 | -4.190781 | -2.527487 |
| C  | 1.990192  | -2.652943 | -4.584818 |
| F  | 2.606404  | -3.815908 | -4.805081 |
| F  | 2.953642  | -1.758528 | -4.394460 |
| F  | 1.346042  | -2.334244 | -5.708154 |
| C  | 0.455542  | -4.023072 | 1.315870  |
| C  | -0.492793 | -2.722688 | 1.584419  |
| C  | -0.217838 | -5.423845 | 1.484724  |
| F  | -1.161974 | -5.633840 | 0.576828  |
| F  | -0.763520 | -5.572849 | 2.691166  |
| F  | 0.672265  | -6.406868 | 1.331716  |
| C  | 1.760823  | -4.013033 | 2.189944  |
| F  | 1.540355  | -4.286306 | 3.475633  |
| F  | 2.374135  | -2.832454 | 2.106037  |
| F  | 2.635344  | -4.909845 | 1.735505  |
| C  | -1.957385 | -2.913115 | 1.043074  |
| F  | -1.949962 | -3.375131 | -0.202061 |
| F  | -2.587737 | -1.739599 | 0.996561  |
| F  | -2.700314 | -3.732095 | 1.795037  |
| C  | -0.603390 | -2.246875 | 3.072607  |
| F  | -1.478442 | -1.244406 | 3.184550  |
| F  | 0.553938  | -1.779391 | 3.527289  |
| F  | -1.010197 | -3.211488 | 3.897797  |
| H  | 2.327244  | -1.427602 | -0.254208 |

-----  
 Calculated energies and coordinates of **B[H-1]** at PBE0-D4(CPCM=acetonitrile)/def2-TZVP level of theory

|                         |     |                   |
|-------------------------|-----|-------------------|
| Electronic energy       | ... | -5230.38799575 Eh |
| Total Enthalpy          | ... | -5230.17806933 Eh |
| Final Gibbs free energy | ... | -5230.27760702 Eh |

CARTESIAN COORDINATES (ANGSTROEM)

|    |           |           |           |
|----|-----------|-----------|-----------|
| Ge | 1.081630  | -2.224234 | -0.634726 |
| O  | -0.176247 | -1.451850 | -1.723010 |
| O  | 1.783342  | -2.936136 | -2.238893 |
| O  | 0.878953  | -3.928015 | 0.017599  |
| O  | 0.049629  | -1.711907 | 0.864466  |
| C  | 0.116819  | -1.430205 | -3.061097 |
| C  | 1.028507  | -2.751378 | -3.351873 |
| C  | -1.243440 | -1.333125 | -3.826880 |
| F  | -2.090118 | -2.285684 | -3.456565 |
| F  | -1.082697 | -1.408385 | -5.146803 |
| F  | -1.855248 | -0.175448 | -3.569830 |
| C  | 0.899155  | -0.088518 | -3.306124 |
| F  | 1.101498  | 0.179438  | -4.595562 |
| F  | 2.080173  | -0.111816 | -2.687351 |
| F  | 0.236329  | 0.942878  | -2.785202 |
| C  | 0.171015  | -4.057419 | -3.526999 |
| F  | 0.952410  | -5.135950 | -3.474755 |
| F  | -0.493209 | -4.106629 | -4.685322 |

```

F -0.701244 -4.188521 -2.532843
C 1.990159 -2.654207 -4.585057
F 2.604727 -3.818283 -4.803933
F 2.954644 -1.761547 -4.392174
F 1.348395 -2.334103 -5.708909
C 0.455820 -4.023063 1.317600
C -0.494430 -2.724464 1.585181
C -0.214676 -5.424853 1.490008
F -1.160572 -5.637335 0.584115
F -0.757241 -5.573100 2.697467
F 0.676940 -6.406056 1.335344
C 1.762569 -4.009209 2.189629
F 1.544318 -4.280642 3.475617
F 2.373521 -2.827632 2.102371
F 2.637701 -4.905167 1.734678
C -1.959085 -2.918459 1.045610
F -1.951595 -3.381205 -0.199685
F -2.591615 -1.745912 0.997884
F -2.699635 -3.737775 1.798477
C -0.604172 -2.246635 3.072846
F -1.480459 -1.245092 3.183494
F 0.553118 -1.776736 3.524977
F -1.008655 -3.210459 3.899487
H 2.324015 -1.428819 -0.255437

```

-----  
Calculated energies and coordinates of **B[H-1]** at PBE0-D3/def2-TZVPP

```

Electronic energy ... -5230.31935171 Eh
Total Enthalpy ... -5230.10830518 Eh
Final Gibbs free energy ... -5230.20821438 Eh

```

CARTESIAN COORDINATES (ANGSTROEM)

```

Ge 7.823400 6.436069 12.130075
F 10.826701 5.806517 13.319296
F 10.290230 3.915316 14.127873
F 11.080994 5.430654 15.432488
F 8.570607 3.749251 15.935007
F 8.864150 5.572819 17.023877
F 6.982468 5.161948 16.063516
F 10.991087 8.042926 14.474086
F 10.119053 7.832470 16.431051
F 9.595996 9.490088 15.177262
F 7.356366 7.846098 16.522433
F 7.145428 9.166852 14.842430
F 6.302419 7.219073 14.741018
F 9.518145 3.325227 9.090864
F 10.957480 4.719034 9.812361
F 10.109938 4.968063 7.849403
F 6.301136 5.702229 9.511787
F 7.344502 5.029538 7.740761
F 7.078729 3.727439 9.427965
F 11.140745 7.323893 8.856201
F 10.849100 6.969724 10.967928
F 10.386418 8.873311 10.141873
F 8.930690 7.255678 7.243526
F 7.052976 7.724820 8.185031
F 8.680792 9.089686 8.325762
O 8.064273 5.265838 13.584850
O 8.629398 7.681948 13.219083
O 8.602713 5.164900 11.050579
O 8.114790 7.596831 10.676345
C 8.810766 5.732181 14.612606
C 8.691221 7.362077 14.545357
C 8.682052 5.480072 9.724039
C 8.852156 7.104006 9.653999
C 10.280274 5.222723 14.376880
C 8.299589 5.057779 15.928970
C 9.870234 8.181552 15.166615
C 7.359218 7.897626 15.186627
C 9.838067 4.623027 9.109863
C 7.337195 4.985952 9.076960
C 10.335261 7.565462 9.900659
C 8.371561 7.790021 8.332018
H 6.299502 6.460467 12.122742

```

-----  
Calculated energies and coordinates of **B[F-1]** at PBE0-D3/def2-TZVPP

```

Electronic energy ... -5329.56512578 Eh
Total Enthalpy ... -5329.35855798 Eh
Final Gibbs free energy ... -5329.46017603 Eh

```

CARTESIAN COORDINATES (ANGSTROEM)

```

Ge 7.892306 6.433745 12.130303
F 10.806868 5.808770 13.312452
F 10.271362 3.921531 14.128929
F 11.071891 5.436697 15.425557
F 8.538057 3.752433 15.911734
F 8.853375 5.564069 17.014963
F 6.964327 5.177865 16.058274
F 10.989581 8.042717 14.459325
F 10.139066 7.819969 16.424582
F 9.612114 9.491760 15.190988
F 7.392955 7.874086 16.550071
F 7.159013 9.191349 14.868156
F 6.299891 7.249317 14.794033
F 9.533155 3.323402 9.071044
F 10.952511 4.717835 9.828689
F 10.132359 4.983608 7.856164
F 6.296275 5.672579 9.454613
F 7.380235 4.999294 7.710573
F 7.088924 3.702470 9.400021
F 11.130596 7.319276 8.868315
F 10.824107 6.966195 10.978722
F 10.363051 8.866748 10.146229
F 8.921817 7.268011 7.252852
F 7.034854 7.712349 8.188162
F 8.649258 9.088899 8.352408
O 8.060187 5.283612 13.570686
O 8.613160 7.704294 13.227711
O 8.583671 5.141420 11.039614
O 8.105064 7.576733 10.689274
C 8.799087 5.746172 14.611933
C 8.684757 7.375781 14.554962
C 8.673116 5.465890 9.712455
C 8.837602 7.089598 9.654567
C 10.266462 5.228164 14.376978
C 8.277442 5.062546 15.919803
C 9.877870 8.182836 15.167417
C 7.362939 7.920823 15.212569
C 9.844361 4.621837 9.107409
C 7.338616 4.962350 9.048342
C 10.318198 7.559807 9.904276
C 8.349491 7.787533 8.341436
F 6.167886 6.460910 12.124341

```

-----  
Calculated energies and coordinates of **2** at PBE0-D4(CPCM=DCM)/def2-TZVP level of theory

```

Electronic energy ... -3442.33762144 Eh
Total Enthalpy ... -3442.13280403 Eh
Final Gibbs free energy ... -3442.23043761 Eh

```

CARTESIAN COORDINATES (ANGSTROEM)

```

Si 6.241492 7.760971 4.237656
O 6.213586 6.537301 5.325411
O 6.278562 8.983590 5.326575
O 5.012339 7.710685 3.156829
O 7.457513 7.812316 3.141670
C 6.492106 6.989285 6.619950
C 6.003057 8.530428 6.621419
C 5.452926 7.997748 1.860262
C 6.999952 7.530484 1.849380
C 5.789244 6.017728 7.624251
C 6.707763 9.501203 7.625183
C 4.484088 7.283945 0.861241
C 7.953533 8.248474 0.838467
C 5.280406 9.553708 1.716583

```

|   |          |           |           |
|---|----------|-----------|-----------|
| C | 7.170630 | 5.975172  | 1.696457  |
| C | 4.445381 | 8.680576  | 6.772567  |
| C | 8.049986 | 6.838437  | 6.766452  |
| F | 6.344312 | 4.813274  | 7.574040  |
| F | 4.507221 | 5.864056  | 7.333336  |
| F | 5.898196 | 6.472486  | 8.865994  |
| F | 6.601174 | 9.045054  | 8.866632  |
| F | 6.152235 | 10.705548 | 7.577313  |
| F | 7.989169 | 9.655713  | 7.332150  |
| F | 4.025210 | 8.407999  | 7.997428  |
| F | 4.064525 | 9.908784  | 6.461843  |
| F | 3.839062 | 7.867741  | 5.904342  |
| F | 8.473701 | 7.109437  | 7.990489  |
| F | 8.429381 | 5.610388  | 6.453344  |
| F | 8.654122 | 7.651716  | 5.897118  |
| F | 9.165063 | 7.707985  | 0.875357  |
| F | 8.094115 | 9.531455  | 1.131345  |
| F | 7.488181 | 8.137500  | -0.399250 |
| F | 4.928434 | 7.398783  | -0.383651 |
| F | 3.273814 | 7.825358  | 0.920563  |
| F | 4.347798 | 6.000023  | 1.152363  |
| F | 5.532276 | 9.980930  | 0.489516  |
| F | 4.051309 | 9.916814  | 2.043992  |
| F | 6.095137 | 10.168572 | 2.576960  |
| F | 6.897793 | 5.552831  | 0.472274  |
| F | 8.405519 | 5.611406  | 2.000780  |
| F | 6.370692 | 5.356095  | 2.567471  |

-----  
 Calculated energies and coordinates of **2** at PBE0-D4(CPCM=benzene)/def2-TZVP level of theory

|                         |     |                   |
|-------------------------|-----|-------------------|
| Electronic energy       | ... | -3442.33672263 Eh |
| Total Enthalpy          | ... | -3442.13138544 Eh |
| Final Gibbs free energy | ... | -3442.22895812 Eh |

CARTESIAN COORDINATES (ANGSTROEM)

|    |          |           |           |
|----|----------|-----------|-----------|
| Si | 6.241477 | 7.760966  | 4.237644  |
| O  | 6.213627 | 6.537278  | 5.325321  |
| O  | 6.278502 | 8.983605  | 5.326480  |
| O  | 5.012309 | 7.710710  | 3.156898  |
| O  | 7.457520 | 7.812266  | 3.141744  |
| C  | 6.492019 | 6.989255  | 6.619875  |
| C  | 6.003131 | 8.530460  | 6.621340  |
| C  | 5.452882 | 7.997668  | 1.860322  |
| C  | 6.999971 | 7.530564  | 1.849439  |
| C  | 5.789252 | 6.017675  | 7.624073  |
| C  | 6.707750 | 9.501273  | 7.624982  |
| C  | 4.484025 | 7.283959  | 0.861382  |
| C  | 7.953604 | 8.248448  | 0.838635  |
| C  | 5.279901 | 9.553507  | 1.716809  |
| C  | 7.171131 | 5.975382  | 1.696645  |
| C  | 4.445577 | 8.681086  | 6.772399  |
| C  | 8.049776 | 6.837924  | 6.766269  |
| F  | 6.344982 | 4.813595  | 7.574377  |
| F  | 4.507378 | 5.863349  | 7.333005  |
| F  | 5.897808 | 6.472635  | 8.865798  |
| F  | 6.601577 | 9.044940  | 8.866420  |
| F  | 6.151562 | 10.705243 | 7.577617  |
| F  | 7.989005 | 9.656436  | 7.331780  |
| F  | 4.025086 | 8.410615  | 7.997683  |
| F  | 4.064829 | 9.908811  | 6.459952  |
| F  | 3.838814 | 7.867298  | 5.905322  |
| F  | 8.473843 | 7.106867  | 7.990702  |
| F  | 8.429052 | 5.610347  | 6.451478  |
| F  | 8.654351 | 7.652112  | 5.898027  |
| F  | 9.164764 | 7.707297  | 0.875060  |
| F  | 8.094845 | 9.531295  | 1.131642  |
| F  | 7.488088 | 8.137856  | -0.399073 |
| F  | 4.928528 | 7.398510  | -0.383503 |
| F  | 3.274066 | 7.825926  | 0.920261  |
| F  | 4.347188 | 6.000145  | 1.152578  |
| F  | 5.529694 | 9.981097  | 0.489382  |
| F  | 4.051323 | 9.916514  | 2.045960  |
| F  | 6.095558 | 10.168783 | 2.576074  |
| F  | 6.900359 | 5.552705  | 0.472058  |

|   |          |          |          |
|---|----------|----------|----------|
| F | 8.405560 | 5.611742 | 2.002674 |
| F | 6.370288 | 5.355857 | 2.566567 |

-----  
 Calculated energies and coordinates of **2**-MeCN at PBE0-D4(CPCM=benzene)/def2-TZVP level of theory

|                         |     |                   |
|-------------------------|-----|-------------------|
| Electronic energy       | ... | -3575.00611941 Eh |
| Total Enthalpy          | ... | -3574.74907229 Eh |
| Final Gibbs free energy | ... | -3574.85531876 Eh |

CARTESIAN COORDINATES (ANGSTROEM)

|    |           |          |           |
|----|-----------|----------|-----------|
| Si | 7.968816  | 6.417901 | 12.130199 |
| F  | 10.651801 | 5.509481 | 13.194334 |
| F  | 9.930128  | 3.725002 | 14.096314 |
| F  | 10.935683 | 5.182846 | 15.313637 |
| F  | 8.172199  | 3.781415 | 15.847277 |
| F  | 8.716822  | 5.551328 | 16.934100 |
| F  | 6.794146  | 5.397694 | 15.971660 |
| F  | 11.107344 | 7.711511 | 14.284951 |
| F  | 10.267011 | 7.679465 | 16.270438 |
| F  | 9.929488  | 9.348265 | 14.962164 |
| F  | 7.532046  | 8.000424 | 16.442965 |
| F  | 7.464743  | 9.321677 | 14.749159 |
| F  | 6.369517  | 7.504567 | 14.688391 |
| F  | 9.905416  | 3.457569 | 9.311339  |
| F  | 11.103727 | 5.074148 | 10.001026 |
| F  | 10.281031 | 5.122613 | 8.008659  |
| F  | 6.372956  | 5.356143 | 9.557116  |
| F  | 7.543105  | 4.842289 | 7.812956  |
| F  | 7.440428  | 3.522333 | 9.506160  |
| F  | 10.979314 | 7.608347 | 8.970343  |
| F  | 10.674777 | 7.283601 | 11.086887 |
| F  | 9.986732  | 9.079889 | 10.182044 |
| F  | 8.767833  | 7.273399 | 7.332301  |
| F  | 6.840574  | 7.457850 | 8.280064  |
| F  | 8.243666  | 9.051591 | 8.415520  |
| O  | 7.907768  | 5.357852 | 13.483132 |
| O  | 8.642800  | 7.601097 | 13.110591 |
| O  | 8.631488  | 5.224299 | 11.154689 |
| O  | 7.934709  | 7.478595 | 10.776713 |
| N  | 6.129225  | 6.433397 | 12.122930 |
| C  | 8.695209  | 5.716926 | 14.546516 |
| C  | 8.748114  | 7.329780 | 14.460986 |
| C  | 8.752207  | 5.494120 | 9.805300  |
| C  | 8.725190  | 7.107614 | 9.719744  |
| C  | 10.090159 | 5.027144 | 14.299203 |
| C  | 8.084708  | 5.108386 | 15.851161 |
| C  | 10.041795 | 8.023259 | 15.005027 |
| C  | 7.512160  | 8.046756 | 15.116437 |
| C  | 10.039412 | 4.780672 | 9.271518  |
| C  | 7.510834  | 4.796315 | 9.139275  |
| C  | 10.128636 | 7.775732 | 9.978597  |
| C  | 8.134761  | 7.726203 | 8.410535  |
| C  | 4.988988  | 6.442476 | 12.110941 |
| C  | 3.558060  | 6.456184 | 12.097399 |
| H  | 3.210047  | 6.721974 | 11.097333 |
| H  | 3.206781  | 7.194111 | 12.822347 |
| H  | 3.189331  | 5.465863 | 12.372601 |

-----  
 Calculated energies and coordinates of Compound **3** at PBE0-D4(CPCM=DCM)/def2-TZVP level of theory

|                         |     |                   |
|-------------------------|-----|-------------------|
| Electronic energy       | ... | -3653.18556968 Eh |
| Total Enthalpy          | ... | -3653.08432860 Eh |
| Final Gibbs free energy | ... | -3653.14830528 Eh |

CARTESIAN COORDINATES (ANGSTROEM)

|    |           |           |           |
|----|-----------|-----------|-----------|
| Ge | -0.000129 | 2.529572  | 0.000093  |
| O  | -0.971458 | 1.204605  | 0.792892  |
| O  | 0.971511  | 1.204906  | -0.792825 |
| C  | -0.757176 | -0.063161 | 0.285918  |
| C  | 0.757212  | -0.063020 | -0.286240 |
| C  | -1.069636 | -1.081325 | 1.430953  |
| F  | -0.412555 | -0.770233 | 2.540674  |

F -0.753468 -2.324591 1.085207  
 F -2.363709 -1.067533 1.739124  
 C -1.838791 -0.236670 -0.843042  
 F -1.867504 -1.463007 -1.350781  
 F -1.613590 0.635383 -1.830044  
 F -3.050957 0.040123 -0.378364  
 C 1.838341 -0.236669 0.843143  
 F 3.050625 0.041169 0.379393  
 F 1.867438 -1.463323 1.350087  
 F 1.611950 0.634530 1.830632  
 C 1.070264 -1.081046 -1.431311  
 F 0.413712 -0.769984 -2.541345  
 F 0.754119 -2.324391 -1.085823  
 F 2.364466 -1.067105 -1.738918

-----  
 Calculated energies and coordinates of 3-MeCN at PBE0-D4(CPCM=DCM)/def2-TZVP level of theory

Electronic energy ... -3785.85639647 Eh  
 Total Enthalpy ... -3785.70362806 Eh  
 Final Gibbs free energy ... -3785.77885706 Eh

CARTESIAN COORDINATES (ANGSTROEM)

Ge 1.510846 1.421875 -0.648441  
 O 0.478545 0.012467 -1.307624  
 O 0.520514 1.179007 0.926000  
 C -0.442759 -0.535898 -0.451338  
 C -0.687297 0.566834 0.721116  
 C -1.702441 -0.922584 -1.298596  
 F -1.435224 -1.943718 -2.114505  
 F -2.095111 0.081299 -2.073364  
 F -2.731468 -1.289764 -0.537877  
 C 0.183620 -1.874802 0.076704  
 F 1.208051 -1.652488 0.892324  
 F 0.671504 -2.586203 -0.938314  
 F -0.703372 -2.640972 0.715944  
 C -1.668517 1.712061 0.269555  
 F -1.635657 2.722809 1.132068  
 F -2.936071 1.330381 0.149352  
 F -1.264838 2.218480 -0.903346  
 C -1.186457 0.030776 2.102693  
 F -1.407109 1.039344 2.946428  
 F -0.285211 -0.750367 2.684015  
 F -2.322919 -0.655780 1.999215  
 N 3.105356 0.172225 0.150571  
 C 4.032149 -0.388554 0.523460  
 C 5.171490 -1.120706 1.004298  
 H 5.452141 -1.871363 0.263121  
 H 4.908191 -1.613489 1.942202  
 H 6.005035 -0.436090 1.168715

-----  
 Calculated energies and coordinates of 3-MeCN at PBE0-D4(CPCM=acetonitrile)/def2-TZVP level of theory

Electronic energy ... -3785.85836779 Eh  
 Total Enthalpy ... -3785.70572528 Eh  
 Final Gibbs free energy ... -3785.78067625 Eh

CARTESIAN COORDINATES (ANGSTROEM)

Ge 1.558017 1.267225 -0.631483  
 O 0.423254 -0.014588 -1.376760  
 O 0.585183 0.959432 0.941971  
 C -0.517117 -0.570638 -0.547590  
 C -0.661737 0.440346 0.724630  
 C -1.816198 -0.792939 -1.394325  
 F -1.632816 -1.739015 -2.317254  
 F -2.161261 0.307121 -2.053850  
 F -2.850526 -1.171611 -0.645980  
 C 0.028944 -1.987052 -0.149900  
 F 1.099920 -1.895652 0.629975  
 F 0.418763 -2.654813 -1.234911  
 F -0.883761 -2.735834 0.473839  
 C -1.583222 1.677205 0.409260  
 F -1.451895 2.611622 1.346661

F -2.876630 1.381695 0.316982  
 F -1.195893 2.253959 -0.735044  
 C -1.152269 -0.192194 2.068615  
 F -1.322913 0.747144 3.000442  
 F -0.267110 -1.049194 2.562493  
 F -2.313599 -0.828959 1.932223  
 N 3.096472 -0.058874 0.092034  
 C 4.078768 -0.369973 0.596241  
 C 5.304427 -0.771137 1.227595  
 H 5.105099 -1.596483 1.913445  
 H 5.714282 0.076146 1.781147  
 H 6.016809 -1.088160 0.463920

-----  
 Calculated energies and coordinates of Compound 3\*\_Ge at PBE0-D4(CPCM=DCM)/def2-TZVP level of theory

Electronic energy ... -5757.12723823 Eh  
 Total Enthalpy ... -5756.70436594 Eh  
 Final Gibbs free energy ... -5756.82749411 Eh

CARTESIAN COORDINATES (ANGSTROEM)

Ge 0.682796 -1.060073 -0.827283  
 O -0.855276 -0.498433 -1.554416  
 O 0.930780 -2.184535 -2.210720  
 O 0.315017 -2.159560 0.498172  
 O 0.174515 0.305897 1.399935  
 C -0.961172 -0.857607 -2.890068  
 C -0.157555 -2.261202 -3.056956  
 C -2.488959 -0.876560 -3.230158  
 F -3.166101 -1.668659 -2.412868  
 F -2.699455 -1.277609 -4.479919  
 F -3.013082 0.338883 -3.100138  
 C -0.291383 0.315358 -3.699085  
 F -0.415598 0.188315 -5.011959  
 F 1.009135 0.383384 -3.390516  
 F -0.812899 1.485802 -3.356487  
 C -0.990372 -3.507727 -2.585160  
 F -0.201612 -4.566956 -2.443376  
 F -1.951154 -3.826962 -3.448785  
 F -1.534009 -3.286389 -1.392591  
 C 0.403297 -2.568317 -4.488303  
 F 0.917303 -3.794518 -4.540497  
 F 1.382400 -1.733191 -4.807199  
 F -0.540953 -2.490776 -5.420166  
 C 0.474763 -2.025990 1.855641  
 C -0.201864 -0.632442 2.338060  
 C -0.162634 -3.367129 2.399487  
 F -1.379888 -3.539778 1.903824  
 F -0.238397 -3.432971 3.719375  
 F 0.572462 -4.399049 1.991194  
 C 2.021687 -2.066446 2.146881  
 F 2.300671 -2.298497 3.422585  
 F 2.593586 -0.916071 1.790851  
 F 2.603975 -3.013061 1.420971  
 C -1.768810 -0.703561 2.280750  
 F -2.190580 -1.206289 1.128916  
 F -2.287592 0.517154 2.372960  
 F -2.261714 -1.431745 3.281024  
 C 0.206893 -0.195274 3.798451  
 F -0.651752 0.689765 4.295303  
 F 1.408054 0.378645 3.776280  
 F 0.247071 -1.201380 4.655820  
 Si 0.491637 2.022801 1.309402  
 C -0.236790 3.021070 2.712629  
 C -0.307242 2.521215 -0.294966  
 C 2.349384 2.285251 1.272556  
 H -1.266675 2.728384 2.921317  
 C -0.183517 4.511683 2.359917  
 H 0.335869 2.845551 3.626035  
 H -0.832120 4.750568 1.514604  
 H 0.827876 4.838249 2.101974  
 H -0.512423 5.116572 3.208109  
 C -1.828056 2.415984 -0.335222  
 H 0.141650 1.971622 -1.125038  
 H 0.005443 3.561449 -0.451541

|   |           |           |           |
|---|-----------|-----------|-----------|
| H | -2.157149 | 1.381095  | -0.238938 |
| H | -2.223464 | 2.798263  | -1.278956 |
| H | -2.290041 | 2.988081  | 0.473073  |
| H | 2.843736  | 1.449174  | 1.771607  |
| H | 2.524761  | 3.151226  | 1.921914  |
| C | 2.985115  | 2.546712  | -0.091054 |
| H | 2.872732  | 1.701166  | -0.773925 |
| H | 4.056531  | 2.737592  | 0.008543  |
| H | 2.540097  | 3.415379  | -0.581315 |
| H | 1.867915  | -0.138768 | -0.685677 |

-----  
 Calculated energies and coordinates of Compound 3\*\_Si at PBE0-D4(CPCM=DCM)/def2-TZVP level of theory

|                         |     |                   |
|-------------------------|-----|-------------------|
| Electronic energy       | ... | -3969.83058328 Eh |
| Total Enthalpy          | ... | -3969.40556420 Eh |
| Final Gibbs free energy | ... | -3969.52758424 Eh |

CARTESIAN COORDINATES (ANGSTROEM)

|    |           |           |           |
|----|-----------|-----------|-----------|
| Si | 0.590319  | -1.126301 | -0.923720 |
| O  | -0.804881 | -0.508939 | -1.578391 |
| O  | 0.871172  | -2.176068 | -2.186058 |
| O  | 0.260584  | -2.006267 | 0.396751  |
| O  | 0.179193  | 0.386232  | 1.431928  |
| C  | -0.970318 | -0.852257 | -2.915380 |
| C  | -0.188266 | -2.264650 | -3.077317 |
| C  | -2.502869 | -0.856565 | -3.224495 |
| F  | -3.170183 | -1.639658 | -2.391507 |
| F  | -2.729300 | -1.266053 | -4.468606 |
| F  | -3.015384 | 0.362062  | -3.093862 |
| C  | -0.300809 | 0.319703  | -3.725769 |
| F  | -0.446488 | 0.194094  | -5.036358 |
| F  | 1.000649  | 0.377520  | -3.433734 |
| F  | -0.813619 | 1.489139  | -3.368748 |
| C  | -1.028196 | -3.508809 | -2.610539 |
| F  | -0.244945 | -4.572559 | -2.482658 |
| F  | -1.997331 | -3.810205 | -3.467503 |
| F  | -1.557160 | -3.289276 | -1.410935 |
| C  | 0.399660  | -2.573833 | -4.494648 |
| F  | 0.915556  | -3.797556 | -4.540907 |
| F  | 1.379098  | -1.736516 | -4.801708 |
| F  | -0.540207 | -2.494761 | -5.430616 |
| C  | 0.492135  | -1.956418 | 1.749633  |
| C  | -0.168231 | -0.592223 | 2.324099  |
| C  | -0.101702 | -3.334968 | 2.248464  |
| F  | -1.341083 | -3.495203 | 1.806174  |
| F  | -0.107920 | -3.478531 | 3.563065  |
| F  | 0.622549  | -4.330092 | 1.739251  |
| C  | 2.052341  | -1.996863 | 1.955082  |
| F  | 2.381509  | -2.371594 | 3.184442  |
| F  | 2.607347  | -0.815219 | 1.711607  |
| F  | 2.598213  | -2.854453 | 1.098403  |
| C  | -1.737207 | -0.677894 | 2.309413  |
| F  | -2.189200 | -1.135849 | 1.149598  |
| F  | -2.266243 | 0.530233  | 2.469778  |
| F  | -2.193651 | -1.457344 | 3.288697  |
| C  | 0.280791  | -0.229422 | 3.791637  |
| F  | -0.556481 | 0.646044  | 4.340353  |
| F  | 1.486562  | 0.331864  | 3.775563  |
| F  | 0.326506  | -1.276103 | 4.600102  |
| Si | 0.492679  | 2.084644  | 1.346970  |
| C  | -0.265300 | 3.060438  | 2.753285  |
| C  | -0.291861 | 2.572295  | -0.268812 |
| C  | 2.333319  | 2.412291  | 1.341549  |
| H  | -1.275894 | 2.710276  | 2.969403  |
| C  | -0.301715 | 4.554537  | 2.417645  |
| H  | 0.321361  | 2.904655  | 3.662538  |
| H  | -0.949209 | 4.760692  | 1.562582  |
| H  | 0.689976  | 4.947886  | 2.179878  |
| H  | -0.684320 | 5.130339  | 3.263943  |
| C  | -1.811126 | 2.444736  | -0.314763 |
| H  | 0.166697  | 2.005207  | -1.082045 |
| H  | 0.009456  | 3.613191  | -0.441285 |
| H  | -2.126797 | 1.407936  | -0.191140 |
| H  | -2.209444 | 2.794819  | -1.269903 |

|   |           |           |           |
|---|-----------|-----------|-----------|
| H | -2.287202 | 3.030426  | 0.475571  |
| H | 2.787750  | 1.923557  | 2.208259  |
| H | 2.389094  | 3.487739  | 1.558281  |
| C | 3.132831  | 2.119678  | 0.075895  |
| H | 3.251709  | 1.048350  | -0.092168 |
| H | 4.136747  | 2.547087  | 0.141356  |
| H | 2.655590  | 2.541335  | -0.812118 |
| H | 1.711674  | -0.214318 | -0.774573 |

-----  
 Calculated energies and coordinates of 4 at PBE0-D4(CPCM=DCM)/def2-TZVP level of theory

|                         |     |                   |
|-------------------------|-----|-------------------|
| Electronic energy       | ... | -2103.92509554 Eh |
| Total Enthalpy          | ... | -2103.60313079 Eh |
| Final Gibbs free energy | ... | -2103.68923676 Eh |

CARTESIAN COORDINATES (ANGSTROEM)

|    |           |           |           |
|----|-----------|-----------|-----------|
| O  | -2.560390 | -0.458770 | 1.112834  |
| O  | 0.647962  | 0.190914  | -0.165216 |
| C  | -1.672346 | 0.212335  | 0.295832  |
| C  | -0.337001 | -0.634404 | 0.267369  |
| C  | -2.350036 | 0.413034  | -1.110235 |
| F  | -3.356866 | 1.287768  | -0.978701 |
| F  | -2.890610 | -0.715778 | -1.549394 |
| F  | -1.530505 | 0.874562  | -2.043661 |
| C  | -1.404458 | 1.682165  | 0.841922  |
| F  | -2.539242 | 2.121024  | 1.400099  |
| F  | -1.081662 | 2.529044  | -0.131753 |
| F  | -0.462927 | 1.779139  | 1.765708  |
| C  | -0.042929 | -1.252232 | 1.703124  |
| F  | 1.262161  | -1.522015 | 1.785476  |
| F  | -0.703774 | -2.391102 | 1.894740  |
| F  | -0.335661 | -0.457347 | 2.720409  |
| C  | -0.395732 | -1.879078 | -0.701662 |
| F  | -1.483756 | -2.625004 | -0.555823 |
| F  | 0.661085  | -2.664522 | -0.481657 |
| F  | -0.323749 | -1.486187 | -1.968396 |
| Si | 2.319227  | 0.468045  | -0.250706 |
| C  | 2.939990  | 1.034089  | 1.426504  |
| C  | 2.393450  | 1.843176  | -1.511840 |
| C  | 3.223068  | -1.047817 | -0.867634 |
| H  | 2.088033  | 1.434617  | 1.984655  |
| C  | 4.054746  | 2.079146  | 1.371523  |
| H  | 3.278207  | 0.154180  | 1.983000  |
| H  | 3.720607  | 2.994428  | 0.877770  |
| H  | 4.928799  | 1.714913  | 0.825909  |
| H  | 4.387974  | 2.350585  | 2.376657  |
| C  | 1.942111  | 1.439713  | -2.913162 |
| H  | 3.424390  | 2.213851  | -1.539777 |
| H  | 1.787112  | 2.675159  | -1.135591 |
| H  | 1.975556  | 2.286457  | -3.603796 |
| H  | 0.919282  | 1.057499  | -2.909239 |
| H  | 2.581950  | 0.655487  | -3.326263 |
| H  | 2.720180  | -1.416442 | -1.767611 |
| H  | 3.143388  | -1.844121 | -0.122361 |
| C  | 4.694648  | -0.761978 | -1.172921 |
| H  | 4.805104  | 0.012605  | -1.936453 |
| H  | 5.202291  | -1.657549 | -1.540181 |
| H  | 5.233727  | -0.424326 | -0.284126 |
| H  | -3.371183 | 0.049921  | 1.243635  |

-----  
 Calculated energies and coordinates of 4 at PBE0-D4(CPCM=acetonitrile)/def2-TZVP level of theory

|                         |     |                   |
|-------------------------|-----|-------------------|
| Electronic energy       | ... | -2103.92589053 Eh |
| Total Enthalpy          | ... | -2103.60407120 Eh |
| Final Gibbs free energy | ... | -2103.69020638 Eh |

CARTESIAN COORDINATES (ANGSTROEM)

|   |           |           |           |
|---|-----------|-----------|-----------|
| O | -2.560156 | -0.463934 | 1.111694  |
| O | 0.647741  | 0.193354  | -0.162901 |
| C | -1.673303 | 0.212735  | 0.298573  |
| C | -0.337182 | -0.633169 | 0.266436  |
| C | -2.349040 | 0.420726  | -1.107500 |

|    |           |           |           |
|----|-----------|-----------|-----------|
| F  | -3.353448 | 1.297625  | -0.975730 |
| F  | -2.891512 | -0.705491 | -1.551655 |
| F  | -1.526410 | 0.883135  | -2.038224 |
| C  | -1.406093 | 1.680069  | 0.851680  |
| F  | -2.540899 | 2.116876  | 1.410343  |
| F  | -1.081824 | 2.531157  | -0.118335 |
| F  | -0.465050 | 1.772839  | 1.776476  |
| C  | -0.043064 | -1.256557 | 1.700008  |
| F  | 1.262245  | -1.523998 | 1.782753  |
| F  | -0.701690 | -2.398222 | 1.885905  |
| F  | -0.339028 | -0.467477 | 2.720882  |
| C  | -0.396065 | -1.874658 | -0.706890 |
| F  | -1.485031 | -2.620620 | -0.564994 |
| F  | 0.659651  | -2.662029 | -0.488615 |
| F  | -0.322828 | -1.477971 | -1.972337 |
| Si | 2.319994  | 0.469097  | -0.250574 |
| C  | 2.939561  | 1.039163  | 1.425514  |
| C  | 2.394175  | 1.840134  | -1.515999 |
| C  | 3.223390  | -1.048685 | -0.863370 |
| H  | 2.086954  | 1.440046  | 1.982450  |
| C  | 4.053298  | 2.085269  | 1.368382  |
| H  | 3.278757  | 0.160581  | 1.983582  |
| H  | 3.718232  | 2.998819  | 0.872005  |
| H  | 4.927806  | 1.720299  | 0.824020  |
| H  | 4.385665  | 2.359525  | 2.373077  |
| C  | 1.944120  | 1.431514  | -2.916292 |
| H  | 3.425332  | 2.210127  | -1.544519 |
| H  | 1.787940  | 2.673583  | -1.142843 |
| H  | 1.977804  | 2.275858  | -3.609911 |
| H  | 0.921435  | 1.048736  | -2.912041 |
| H  | 2.584799  | 0.646092  | -3.325812 |
| H  | 2.720735  | -1.419815 | -1.762443 |
| H  | 3.144399  | -1.842721 | -0.115585 |
| C  | 4.694874  | -0.762957 | -1.169692 |
| H  | 4.804553  | 0.009278  | -1.935700 |
| H  | 5.202695  | -1.659623 | -1.534145 |
| H  | 5.233723  | -0.422120 | -0.281983 |
| H  | -3.375034 | 0.038594  | 1.243322  |

-----  
 Calculated Energies and Coordinates of **5** at PBE0-D4(CPCM=DCM)/def2-TZVP level of theory

|                         |     |                   |
|-------------------------|-----|-------------------|
| Electronic energy       | ... | -4180.68961685 Eh |
| Total Enthalpy          | ... | -4180.36895133 Eh |
| Final Gibbs free energy | ... | -4180.45874709 Eh |

CARTESIAN COORDINATES (ANGSTROEM)

|    |           |           |           |
|----|-----------|-----------|-----------|
| Ge | 1.250435  | -0.269376 | 0.955904  |
| O  | -0.004367 | 1.072603  | 0.962854  |
| O  | 0.052254  | -1.304277 | 0.031089  |
| C  | -1.050391 | 0.836954  | 0.104142  |
| C  | -1.219019 | -0.779462 | 0.014031  |
| C  | -2.278435 | 1.635384  | 0.655360  |
| C  | -0.638624 | 1.476997  | -1.272337 |
| C  | -1.960365 | -1.379304 | 1.263426  |
| C  | -1.916866 | -1.335062 | -1.272224 |
| F  | -2.511637 | 1.356248  | 1.930709  |
| F  | -3.387347 | 1.387120  | -0.036165 |
| F  | -2.052259 | 2.947503  | 0.591777  |
| F  | -1.628786 | 1.510956  | -2.159396 |
| F  | 0.386896  | 0.810203  | -1.808271 |
| F  | -0.213016 | 2.724662  | -1.096536 |
| F  | -1.801695 | -2.699199 | 1.305430  |
| F  | -3.268710 | -1.129579 | 1.264553  |
| F  | -1.435812 | -0.908240 | 2.393506  |
| F  | -2.084711 | -2.654074 | -1.185708 |
| F  | -1.182303 | -1.120016 | -2.356518 |
| F  | -3.115924 | -0.794002 | -1.466835 |
| Si | 3.306104  | 0.156925  | -0.249563 |
| C  | 3.345839  | 1.989893  | -0.644177 |
| C  | 3.294853  | -0.879333 | -1.814596 |
| C  | 4.649436  | -0.281254 | 0.985527  |
| H  | 2.561261  | 2.205110  | -1.374600 |
| H  | 4.296803  | 2.157562  | -1.166202 |
| C  | 3.232519  | 2.924664  | 0.556229  |

|   |          |           |           |
|---|----------|-----------|-----------|
| H | 4.499483 | 0.354018  | 1.865919  |
| H | 5.596109 | 0.049513  | 0.539980  |
| C | 4.746891 | -1.745757 | 1.401877  |
| H | 4.313599 | -0.812461 | -2.217974 |
| H | 2.655783 | -0.357784 | -2.534575 |
| C | 2.867884 | -2.340704 | -1.698576 |
| H | 3.311775 | 3.970379  | 0.248785  |
| H | 4.019527 | 2.737619  | 1.290421  |
| H | 2.271819 | 2.810168  | 1.065931  |
| H | 5.502335 | -1.883117 | 2.179544  |
| H | 5.023201 | -2.382855 | 0.559914  |
| H | 3.799967 | -2.122828 | 1.799993  |
| H | 1.839653 | -2.430272 | -1.342101 |
| H | 3.505765 | -2.899342 | -1.011620 |
| H | 2.919797 | -2.837959 | -2.670539 |
| H | 1.256443 | -0.755094 | 2.419695  |

-----  
 Calculated energies and coordinates of **6** at PBE0-D4(CPCM=DCM)/def2-TZVP level of theory

|                         |     |                   |
|-------------------------|-----|-------------------|
| Electronic energy       | ... | -4180.66063500 Eh |
| Total Enthalpy          | ... | -4180.34073622 Eh |
| Final Gibbs free energy | ... | -4180.43037547 Eh |

CARTESIAN COORDINATES (ANGSTROEM)

|    |           |           |           |
|----|-----------|-----------|-----------|
| Ge | 0.093836  | 2.665039  | 0.723946  |
| O  | -1.149136 | 1.310592  | 0.845998  |
| O  | 0.914745  | -0.110126 | 0.058480  |
| C  | -1.423598 | 0.284039  | -0.010243 |
| C  | -0.241077 | -0.824563 | 0.134235  |
| C  | -2.873382 | -0.154941 | 0.425558  |
| C  | -1.511500 | 0.826943  | -1.486672 |
| C  | -0.278441 | -1.533846 | 1.534979  |
| C  | -0.244358 | -1.949578 | -0.968190 |
| F  | -3.347972 | -1.225439 | -0.197875 |
| F  | -3.720903 | 0.848128  | 0.189611  |
| F  | -2.916888 | -0.394866 | 1.731354  |
| F  | -2.185151 | 1.976958  | -1.511809 |
| F  | -2.132455 | -0.024253 | -2.301112 |
| F  | -0.312835 | 1.085873  | -2.000295 |
| F  | 0.884355  | -2.145547 | 1.764290  |
| F  | -1.238475 | -2.457013 | 1.595347  |
| F  | -0.447127 | -0.676927 | 2.531926  |
| F  | 0.235942  | -1.473029 | -2.112566 |
| F  | -1.444659 | -2.459217 | -1.203160 |
| F  | 0.541007  | -2.965234 | -0.609687 |
| Si | 2.610240  | -0.166514 | -0.068592 |
| C  | 3.280370  | -1.840617 | -0.555227 |
| C  | 3.235508  | 0.321003  | 1.624746  |
| C  | 2.968609  | 1.137090  | -1.364621 |
| H  | 2.827818  | -2.156610 | -1.499209 |
| H  | 2.984571  | -2.577966 | 0.195862  |
| C  | 4.804958  | -1.826173 | -0.698205 |
| H  | 2.171355  | 1.884940  | -1.313188 |
| H  | 2.864410  | 0.659604  | -2.346164 |
| C  | 4.326013  | 1.828035  | -1.246078 |
| H  | 4.309340  | 0.519246  | 1.534004  |
| H  | 3.141920  | -0.547219 | 2.285436  |
| C  | 2.535340  | 1.523336  | 2.243375  |
| H  | 5.182638  | -2.827936 | -0.917189 |
| H  | 5.297853  | -1.483378 | 0.215101  |
| H  | 5.127564  | -1.172679 | -1.511744 |
| H  | 5.156220  | 1.120300  | -1.296408 |
| H  | 4.415163  | 2.366502  | -0.299308 |
| H  | 4.467478  | 2.554728  | -2.050265 |
| H  | 2.946330  | 1.789184  | 3.220687  |
| H  | 1.472804  | 1.309877  | 2.419467  |
| H  | 2.633718  | 2.414851  | 1.611989  |
| H  | -0.262165 | 3.065610  | 2.231063  |

-----  
 Calculated energies and coordinates of **INT1** at PBE0-D4(CPCM=DCM)/def2-TZVP level of theory

|                   |     |                   |
|-------------------|-----|-------------------|
| Electronic energy | ... | -7655.09020443 Eh |
|-------------------|-----|-------------------|

Total Enthalpy ... -7654.71296486 Eh  
Final Gibbs free energy ... -7654.83708072 Eh

CARTESIAN COORDINATES (ANGSTROEM)

O 1.587694 -0.731176 -1.302240  
O 2.553278 1.257381 -0.104446  
C 2.711852 -1.082982 -0.594523  
C 3.515059 0.299550 -0.309282  
C 2.204068 -1.773814 0.720084  
F 1.619421 -0.888265 1.531094  
F 3.181626 -2.378242 1.393612  
F 1.276511 -2.683884 0.445220  
C 3.478644 -2.164590 -1.428778  
F 2.803796 -3.314272 -1.452167  
F 4.684769 -2.425901 -0.930631  
F 3.623499 -1.784549 -2.692347  
C 4.476138 0.324416 0.923943  
F 5.112513 1.493367 1.000486  
F 5.401611 -0.629406 0.858091  
F 3.815510 0.185128 2.065780  
C 4.327301 0.790068 -1.565049  
F 4.729032 2.046999 -1.402508  
F 3.533172 0.798018 -2.643210  
F 5.399356 0.054726 -1.836401  
Ge 1.045510 1.047539 -1.183120  
Ge -0.908522 0.666631 0.920318  
O -2.630242 0.985017 0.323847  
O -1.551639 -0.918575 1.593355  
C -3.371649 -0.165625 0.196187  
C -2.895842 -1.147959 1.407803  
C -4.881201 0.252583 0.179812  
C -3.013318 -0.737810 -1.225206  
C -3.574404 -0.801165 2.778877  
C -3.063516 -2.685418 1.158592  
F -5.689114 -0.803094 0.159395  
F -5.156263 0.987977 -0.896758  
F -5.196158 0.998390 1.230992  
F -3.745875 -1.785986 -1.577921  
F -1.720128 -1.086488 -1.260829  
F -3.161673 0.195515 -2.158197  
F -2.943813 -1.408287 3.779398  
F -4.854797 -1.160542 2.827995  
F -3.489000 0.505306 3.027863  
F -4.305351 -3.002732 0.804273  
F -2.772798 -3.379347 2.258092  
F -2.235073 -3.113831 0.215025  
C -0.769169 2.113534 2.707297  
C -1.320508 3.164392 2.005018  
H 0.307949 1.973603 2.733814  
H -1.327462 1.667275 3.522485  
C -0.560414 3.803912 0.936895  
C -2.741257 3.541152 2.213830  
H -3.119421 3.146369 3.154296  
H -3.359728 3.138786 1.404312  
H -2.853319 4.626840 2.199929  
C -1.232744 4.364231 -0.158013  
C -0.526392 4.844088 -1.245259  
C 0.861883 4.801077 -1.248300  
C 1.544229 4.282295 -0.153963  
C 0.841749 3.779652 0.924626  
H -2.314771 4.390469 -0.173817  
H -1.059833 5.250495 -2.096071  
H 1.414626 5.181655 -2.099343  
H 2.626904 4.262350 -0.145270  
H 1.389166 3.388710 1.772748

-----  
Calculated energies and coordinates of **INT1'** at PBE0-D4(CPCM=DCM)/def2-TZVP level of theory

Electronic energy ... -4001.88343534 Eh  
Total Enthalpy ... -4001.60950462 Eh  
Final Gibbs free energy ... -4001.69322602 Eh

CARTESIAN COORDINATES (ANGSTROEM)

Ge -0.353138 -2.112188 0.243427

O 1.068321 -1.536388 -0.804147  
O -0.433026 -0.345211 0.818608  
C 1.418539 -0.210968 -0.705165  
C 0.749520 0.334717 0.675295  
C 2.979487 -0.132427 -0.791674  
F 3.554571 -0.941019 0.089995  
F 3.436348 1.101752 -0.588921  
F 3.408971 -0.521582 -1.992115  
C 0.837042 0.481552 -1.987072  
F 1.266197 1.733677 -2.144014  
F -0.493214 0.491146 -1.957818  
F 1.176046 -0.199532 -3.079158  
C 1.594781 -0.033910 1.950323  
F 0.892044 0.187297 3.056519  
F 2.733319 0.642018 2.054771  
F 1.871925 -1.344688 1.951177  
C 0.440010 1.867372 0.742516  
F 1.533125 2.600923 0.536209  
F -0.043577 2.199852 1.939653  
F -0.475477 2.230812 -0.143836  
C -2.376485 -1.987688 -1.374523  
C -3.181155 -1.574517 -0.364674  
H -1.977906 -1.298875 -2.108151  
H -2.267111 -3.047606 -1.578788  
C -3.704699 -2.569019 0.616297  
C -3.493630 -0.156817 -0.150257  
H -3.196776 -2.457927 1.582885  
H -3.541143 -3.588000 0.267948  
H -4.769127 -2.413480 0.803669  
C -3.754323 0.323793 1.135818  
C -4.012808 1.667163 1.349797  
C -4.038923 2.550978 0.280148  
C -3.805158 2.082022 -1.006076  
C -3.532923 0.742281 -1.218765  
H -3.369720 0.384383 -2.228222  
H -3.730345 -0.351843 1.981762  
H -4.195220 2.025280 2.356525  
H -4.247175 3.601643 0.447311  
H -3.838006 2.764142 -1.847820

-----  
Calculated energies and coordinates of **TS1** at PBE0-D4(CPCM=DCM)/def2-TZVP level of theory

Electronic energy ... -8182.56427396 Eh  
Total Enthalpy ... -8181.96958506 Eh  
Final Gibbs free energy ... -8182.11783335 Eh

CARTESIAN COORDINATES (ANGSTROEM)

O 1.820067 -2.804771 -2.743941  
O 2.325025 -0.580658 -1.662804  
C 2.830037 -2.917169 -1.828886  
C 3.405945 -1.411367 -1.593728  
C 2.194913 -3.536662 -0.534566  
F 1.378481 -2.662310 0.067959  
F 3.099601 -3.932054 0.360912  
F 1.442545 -4.586847 -0.839467  
C 3.855017 -3.966508 -2.378276  
F 3.323201 -5.190509 -2.390490  
F 4.964157 -4.027799 -1.642618  
F 4.204067 -3.696842 -3.629696  
C 4.129966 -1.132235 -0.232391  
F 4.602145 0.115413 -0.195915  
F 5.160668 -1.948328 -0.024550  
F 3.303748 -1.242434 0.802614  
C 4.381366 -0.956076 -2.742996  
F 4.593726 0.357148 -2.683473  
F 3.827197 -1.180230 -3.937645  
F 5.570769 -1.552963 -2.709993  
Ge 1.039969 -1.100548 -2.964978  
Ge -0.818254 -1.330274 -1.039221  
O -2.609415 -0.971271 -1.369285  
O -1.364314 -3.031409 -0.577138  
C -3.353274 -2.105164 -1.575574



|    |           |           |           |
|----|-----------|-----------|-----------|
| C  | -2.717243 | -3.250259 | -0.603781 |
| C  | -4.852714 | -1.731894 | -1.321221 |
| C  | -3.204390 | -2.446814 | -3.102832 |
| C  | -3.198213 | -3.125724 | 0.886003  |
| C  | -2.933625 | -4.737308 | -1.048586 |
| F  | -5.649696 | -2.795309 | -1.363123 |
| F  | -5.292485 | -0.868808 | -2.237190 |
| F  | -5.014352 | -1.138876 | -0.144440 |
| F  | -4.019239 | -3.414344 | -3.511182 |
| F  | -1.946266 | -2.802073 | -3.380317 |
| F  | -3.452053 | -1.371566 | -3.844855 |
| F  | -2.436223 | -3.868296 | 1.684884  |
| F  | -4.462422 | -3.506380 | 1.064236  |
| F  | -3.069871 | -1.872184 | 1.319676  |
| F  | -4.220161 | -5.025589 | -1.233939 |
| F  | -2.466076 | -5.580888 | -0.128419 |
| F  | -2.279607 | -5.009877 | -2.170156 |
| C  | -0.448886 | -0.255207 | 0.699135  |
| C  | -1.147052 | 0.983686  | 0.506776  |
| H  | 0.633717  | -0.196418 | 0.591548  |
| H  | -0.743820 | -0.827367 | 1.574617  |
| C  | -0.800211 | 1.763813  | -0.690598 |
| C  | -2.511491 | 1.127086  | 1.087285  |
| H  | -2.559930 | 0.669011  | 2.073381  |
| H  | -3.214625 | 0.600708  | 0.434394  |
| H  | -2.817685 | 2.169859  | 1.148690  |
| C  | -1.803081 | 2.385551  | -1.437304 |
| C  | -1.498473 | 2.992406  | -2.644280 |
| C  | -0.191612 | 3.005926  | -3.109321 |
| C  | 0.818604  | 2.413241  | -2.360593 |
| C  | 0.516366  | 1.796450  | -1.161836 |
| H  | -2.830068 | 2.363197  | -1.097694 |
| H  | -2.288370 | 3.450882  | -3.227044 |
| H  | 0.042894  | 3.482117  | -4.054229 |
| H  | 1.844026  | 2.433679  | -2.710014 |
| H  | 1.315703  | 1.354665  | -0.582122 |
| Si | 0.338052  | 2.718900  | 2.713214  |
| C  | 1.078793  | 1.335633  | 3.731889  |
| C  | -0.981960 | 3.738974  | 3.562237  |
| C  | 1.613427  | 3.745009  | 1.810726  |
| C  | 1.030098  | 4.831243  | 0.910853  |
| C  | 2.034646  | 1.793903  | 4.834125  |
| C  | -0.444806 | 4.785494  | 4.539718  |
| H  | 2.440160  | 0.939179  | 5.381307  |
| H  | 1.535525  | 2.440117  | 5.559168  |
| H  | 2.879396  | 2.352021  | 4.423845  |
| H  | 1.599286  | 0.662337  | 3.041411  |
| H  | 0.253369  | 0.755080  | 4.158134  |
| H  | -1.259411 | 5.376505  | 4.966009  |
| H  | 0.240684  | 5.479526  | 4.046890  |
| H  | 0.095720  | 4.325050  | 5.369597  |
| H  | -1.667000 | 3.051481  | 4.070153  |
| H  | -1.569961 | 4.227906  | 2.777296  |
| H  | 2.243034  | 3.058744  | 1.233406  |
| H  | 2.272776  | 4.189180  | 2.566587  |
| H  | 0.382693  | 4.408092  | 0.139187  |
| H  | 1.819656  | 5.392873  | 0.405230  |
| H  | 0.432883  | 5.545945  | 1.482272  |
| H  | -0.428088 | 1.964330  | 1.597335  |

-----

Calculated energies and coordinates of INT2 at PBE0-D4(CPCM=DCM)/def2-TZVP level of theory

|                         |     |                   |
|-------------------------|-----|-------------------|
| Electronic energy       | ... | -8182.57273282 Eh |
| Total Enthalpy          | ... | -8181.97493985 Eh |
| Final Gibbs free energy | ... | -8182.12421382 Eh |

CARTESIAN COORDINATES (ANGSTROM)

|   |          |           |           |
|---|----------|-----------|-----------|
| O | 1.840294 | -2.913531 | -2.533007 |
| O | 2.375046 | -0.702835 | -1.416829 |
| C | 2.824361 | -3.049373 | -1.598424 |
| C | 3.433789 | -1.555722 | -1.346544 |
| C | 2.148247 | -3.649482 | -0.316725 |
| F | 1.346502 | -2.757510 | 0.276009  |

|    |           |           |           |
|----|-----------|-----------|-----------|
| F  | 3.028170  | -4.078318 | 0.591553  |
| F  | 1.370239  | -4.678557 | -0.636901 |
| C  | 3.835349  | -4.120859 | -2.128169 |
| F  | 3.280646  | -5.335950 | -2.146033 |
| F  | 4.934507  | -4.205027 | -1.378290 |
| F  | 4.208739  | -3.862079 | -3.375831 |
| C  | 4.151219  | -1.300945 | 0.022560  |
| F  | 4.632210  | -0.055356 | 0.079461  |
| F  | 5.176737  | -2.124896 | 0.230834  |
| F  | 3.319302  | -1.417657 | 1.052662  |
| C  | 4.434076  | -1.118676 | -2.483194 |
| F  | 4.672344  | 0.191607  | -2.415315 |
| F  | 3.900362  | -1.327813 | -3.688262 |
| F  | 5.614353  | -1.736602 | -2.434880 |
| Ge | 1.080323  | -1.182479 | -2.749550 |
| Ge | -0.820219 | -1.286533 | -0.907366 |
| O  | -2.537328 | -0.850733 | -1.497801 |
| O  | -1.540981 | -2.940286 | -0.437808 |
| C  | -3.322905 | -1.949152 | -1.722282 |
| C  | -2.896718 | -3.049865 | -0.598465 |
| C  | -4.812165 | -1.461622 | -1.702145 |
| C  | -3.009681 | -2.439442 | -3.185762 |
| C  | -3.538042 | -2.752742 | 0.803837  |
| C  | -3.199315 | -4.548111 | -0.939136 |
| F  | -5.682169 | -2.466683 | -1.760837 |
| F  | -5.061523 | -0.665514 | -2.743941 |
| F  | -5.082590 | -0.748215 | -0.614492 |
| F  | -3.858500 | -3.369316 | -3.621263 |
| F  | -1.768922 | -2.926102 | -3.271402 |
| F  | -3.058638 | -1.422003 | -4.041025 |
| F  | -2.919061 | -3.446474 | 1.756712  |
| F  | -4.835563 | -3.058455 | 0.860926  |
| F  | -3.397452 | -1.471507 | 1.136833  |
| F  | -4.477642 | -4.754373 | -1.251798 |
| F  | -2.917017 | -5.333185 | 0.102515  |
| F  | -2.453307 | -4.981220 | -1.946729 |
| C  | -0.565117 | -0.240933 | 0.779552  |
| C  | -1.036309 | 1.189379  | 0.652668  |
| H  | 0.520344  | -0.284190 | 0.896344  |
| H  | -1.021110 | -0.744376 | 1.631966  |
| C  | -0.662422 | 1.818744  | -0.664267 |
| C  | -2.461439 | 1.415770  | 1.096461  |
| H  | -2.615478 | 1.006769  | 2.095071  |
| H  | -3.139407 | 0.901878  | 0.413907  |
| H  | -2.713818 | 2.476991  | 1.104394  |
| C  | -1.623968 | 2.366796  | -1.507050 |
| C  | -1.262837 | 2.880198  | -2.744962 |
| C  | 0.061569  | 2.860546  | -3.152694 |
| C  | 1.029237  | 2.319158  | -2.316467 |
| C  | 0.667918  | 1.803516  | -1.082594 |
| H  | -2.665083 | 2.381183  | -1.213027 |
| H  | -2.026185 | 3.294662  | -3.393344 |
| H  | 0.340409  | 3.261207  | -4.120333 |
| H  | 2.068047  | 2.293158  | -2.624320 |
| H  | 1.432751  | 1.372801  | -0.447315 |
| Si | 0.548698  | 2.784006  | 2.618696  |
| C  | 1.894873  | 1.539617  | 2.873491  |
| C  | -0.760952 | 2.973870  | 3.911808  |
| C  | 0.906797  | 4.245598  | 1.548459  |
| C  | -0.302141 | 5.094792  | 1.165118  |
| C  | 2.900047  | 1.986725  | 3.946111  |
| C  | -0.353913 | 4.005798  | 4.975659  |
| H  | 3.694080  | 1.242990  | 4.036620  |
| H  | 2.427185  | 2.089302  | 4.924675  |
| H  | 3.366239  | 2.941363  | 3.693488  |
| H  | 2.402790  | 1.380158  | 1.917739  |
| H  | 1.434565  | 0.588069  | 3.157621  |
| H  | -1.155425 | 4.115294  | 5.708690  |
| H  | -0.170210 | 4.987964  | 4.534573  |
| H  | 0.547753  | 3.704237  | 5.512082  |
| H  | -0.952564 | 1.997410  | 4.365309  |
| H  | -1.685910 | 3.288748  | 3.418774  |
| H  | 1.452399  | 3.895611  | 0.666759  |
| H  | 1.632797  | 4.836267  | 2.127664  |
| H  | -1.011165 | 4.525793  | 0.560568  |
| H  | 0.012373  | 5.961508  | 0.581006  |

H -0.832100 5.461584 2.046465  
H -0.392692 1.776375 1.440934

-----  
Calculated energies and coordinates of Compound **INT3** at PBE0-D4(CPCM=DCM)/def2-TZVP level of theory

Electronic energy ... -4529.42479979 Eh  
Total Enthalpy ... -4528.92716084 Eh  
Final Gibbs free energy ... -4529.03327144 Eh

CARTESIAN COORDINATES (ANGSTROEM)

H 3.280049 -0.788382 -2.281279  
Ge 0.709949 -0.016175 -0.544009  
O -0.276614 -0.835179 0.788039  
O -0.897130 0.599280 -1.217935  
C -1.594550 -0.458777 0.840390  
C -2.011060 0.020723 -0.668707  
C -2.400743 -1.670189 1.420129  
C -1.674968 0.703546 1.893088  
C -2.391896 -1.179233 -1.610273  
C -3.164326 1.077357 -0.769488  
F -3.712246 -1.436959 1.421318  
F -2.041122 -1.925038 2.677962  
F -2.175606 -2.785891 0.739568  
F -2.919799 1.089577 2.164428  
F -0.986931 1.759930 1.463844  
F -1.112712 0.341128 3.043265  
F -2.426934 -0.780922 -2.879084  
F -3.578298 -1.715112 -1.326102  
F -1.468847 -2.136692 -1.554807  
F -3.475545 1.314254 -2.044347  
F -2.803451 2.246129 -0.253282  
F -4.277803 0.675372 -0.160822  
C 1.378172 -1.511412 -1.620992  
C 2.895811 -1.629544 -1.695122  
H 0.962115 -1.394921 -2.625438  
H 0.935651 -2.416738 -1.199578  
C 3.574506 -1.573222 -0.347679  
C 3.289106 -2.910173 -2.434026  
H 2.846021 -2.928098 -3.432659  
H 2.936916 -3.788403 -1.886029  
H 4.374017 -2.984198 -2.537021  
C 2.932476 -1.955815 0.827269  
C 3.593632 -1.911066 2.049373  
C 4.911348 -1.488948 1.152225  
C 5.566218 -1.111230 0.948358  
C 4.901911 -1.152460 -0.266127  
H 1.908517 -2.312773 0.802664  
H 3.071017 -2.208655 2.951483  
H 5.426609 -1.448688 3.068046  
H 6.596022 -0.773696 0.988080  
H 5.416919 -0.847409 -1.172092  
Si 2.080603 1.947441 -0.126084  
C 0.970760 3.465866 -0.116936  
C 3.224556 2.011490 -1.615287  
C 3.036466 1.746984 1.470923  
H 0.445258 3.504703 0.839626  
H 0.199322 3.360759 -0.885584  
C 1.760247 4.757666 -0.327787  
H 3.614577 2.672168 1.592683  
H 3.770837 0.948553 1.330729  
C 2.193610 1.482116 2.713111  
H 3.922226 1.171256 -1.567402  
H 3.837163 2.912526 -1.489209  
C 2.505967 2.053148 -2.960997  
H 2.230326 4.788615 -1.313391  
H 2.552424 4.874206 0.417143  
H 1.107295 5.630920 -0.248931  
H 2.820658 1.404230 3.605162  
H 1.636954 0.546595 2.622747  
H 1.467796 2.279821 2.888491  
H 3.213113 2.131945 -3.790557  
H 1.825072 2.905638 -3.026001  
H 1.909725 1.151760 -3.135072

-----  
Calculated Energies and Coordinates **TS2** at PBE0-D4(CPCM=DCM)/def2-TZVP level of theory

Electronic energy ... -8182.56381263 Eh  
Total Enthalpy ... -8181.96541925 Eh  
Final Gibbs free energy ... -8182.11285675 Eh

CARTESIAN COORDINATES (ANGSTROEM)

O -3.304682 -1.936539 1.401643  
O -2.952351 -1.726895 -1.101508  
C -3.524921 -3.125126 0.774640  
C -2.793978 -3.016224 -0.683013  
C -3.017225 -4.259238 1.727124  
F -1.770991 -4.041196 2.131152  
F -3.061317 -5.464686 1.159130  
F -3.762012 -4.320188 2.832883  
C -5.085538 -3.282689 0.647798  
F -5.469186 -4.487266 0.223376  
F -5.589413 -2.365298 -0.181899  
F -5.673873 -3.068950 1.822717  
C -1.249694 -3.283344 -0.596151  
F -0.638396 -2.894670 -1.714722  
F -0.941314 -4.566360 -0.403619  
F -0.690013 -2.572454 0.386497  
C -3.356613 -3.943673 -1.812925  
F -2.608066 -3.854575 -2.916896  
F -4.585388 -3.590493 -2.170565  
F -3.382159 -5.229132 -1.463019  
Ge -3.368196 -0.431312 0.237727  
Ge -0.890351 0.275306 0.819401  
O -0.750419 1.851698 1.809490  
O -0.205951 -0.570226 2.336035  
C -0.715891 1.640737 3.158991  
C 0.114012 0.252291 3.380868  
C -0.112041 2.928491 3.813221  
C -2.211461 1.533708 3.636647  
C 1.670114 0.460374 3.318290  
C -0.194264 -0.532728 4.701844  
F 1.040027 3.274909 3.251317  
F 0.093030 2.785978 5.121204  
F -0.932520 3.968667 3.653262  
F -2.348670 1.530042 4.960945  
F -2.783733 0.427220 3.153632  
F -2.926969 2.549402 3.160821  
F 2.290620 -0.709741 3.177564  
F 2.165389 1.047710 4.408667  
F 2.022953 1.187856 2.258741  
F 0.631127 -1.573007 4.837885  
F -1.424301 -1.029917 4.700422  
F -0.053976 0.223126 5.790223  
C 0.637525 0.424256 -0.453471  
C 0.238693 1.132266 -1.756622  
H 0.969282 -0.600673 -0.631205  
H 1.405871 0.972648 0.090537  
C -0.547632 2.384743 -1.431642  
C -0.450396 0.193493 -2.729060  
H 0.209297 -0.633627 -2.998816  
H -0.743300 0.715833 -3.641413  
H -1.340609 -0.258823 -2.288051  
C 0.105935 3.500291 -0.913409  
C -0.605628 4.617222 -0.510574  
C -1.991282 4.635159 -0.611400  
C -2.651870 3.535100 -1.133233  
C -1.934148 2.420524 -1.549871  
H 1.185932 3.489900 -0.811428  
H -0.078333 5.475120 -0.108942  
H -2.550648 5.505511 -0.288247  
H -3.732153 3.538184 -1.224486  
H -2.471268 1.582753 -1.979269  
H 1.151301 1.519632 -2.269712  
Si 3.093793 0.477255 -2.155347  
C 2.889180 0.799925 -3.964291  
C 3.274414 -1.287035 -1.659956  
C 3.849173 1.786463 -1.107747

|   |          |           |           |
|---|----------|-----------|-----------|
| C | 4.022102 | 0.169909  | -4.788754 |
| C | 3.576262 | -1.585071 | -0.196946 |
| C | 5.352380 | 1.803576  | -1.450562 |
| H | 3.883324 | 0.419345  | -5.842326 |
| H | 4.023677 | -0.917728 | -4.701229 |
| H | 5.005565 | 0.536628  | -4.488553 |
| H | 2.847315 | 1.883228  | -4.111850 |
| H | 1.927234 | 0.392963  | -4.289397 |
| H | 4.110856 | -1.613774 | -2.299968 |
| H | 2.409238 | -1.846371 | -2.033450 |
| H | 4.455844 | -1.039591 | 0.150022  |
| H | 3.772022 | -2.650680 | -0.066162 |
| H | 2.741553 | -1.319877 | 0.452589  |
| H | 5.856073 | 2.535441  | -0.816458 |
| H | 5.529929 | 2.087458  | -2.489769 |
| H | 5.826086 | 0.834574  | -1.273466 |
| H | 3.699981 | 1.566787  | -0.049140 |
| H | 3.396034 | 2.755474  | -1.326766 |

-----  
 Calculated energies and coordinates of **TS3** at PBE0-D4(CPCM=DCM)/def2-TZVP level of theory

|                         |     |                   |
|-------------------------|-----|-------------------|
| Electronic energy       | ... | -4529.33050459 Eh |
| Total Enthalpy          | ... | -4528.83632640 Eh |
| Final Gibbs free energy | ... | -4528.94268493 Eh |

CARTESIAN COORDINATES (ANGSTROEM)

|    |           |           |           |
|----|-----------|-----------|-----------|
| Ge | 1.387864  | -1.270136 | 1.313157  |
| O  | 2.715831  | -1.552813 | -0.063594 |
| O  | 2.107709  | 0.517446  | 1.272523  |
| C  | 3.536154  | -0.511461 | -0.360869 |
| C  | 3.399626  | 0.568875  | 0.868225  |
| C  | 4.971447  | -1.090070 | -0.610439 |
| F  | 5.373129  | -1.866823 | 0.390047  |
| F  | 5.895793  | -0.143260 | -0.786666 |
| F  | 4.994539  | -1.859267 | -1.705098 |
| C  | 3.048274  | 0.082250  | -1.731142 |
| F  | 3.900796  | 0.965506  | -2.264015 |
| F  | 1.862392  | 0.678151  | -1.620056 |
| F  | 2.882085  | -0.888901 | -2.631226 |
| C  | 4.294956  | 0.184710  | 2.107345  |
| F  | 3.928325  | 0.887405  | 3.180643  |
| F  | 5.599191  | 0.407834  | 1.917433  |
| F  | 4.141071  | -1.095490 | 2.446237  |
| C  | 3.725837  | 2.061793  | 0.523624  |
| F  | 4.934966  | 2.220780  | -0.016887 |
| F  | 3.688719  | 2.824497  | 1.621537  |
| F  | 2.835910  | 2.586130  | -0.313542 |
| C  | -0.249056 | -0.856667 | 0.109761  |
| C  | -1.444225 | -0.447167 | 0.972056  |
| H  | 0.058440  | -0.065001 | -0.566267 |
| H  | -0.435816 | -1.781063 | -0.448489 |
| C  | -1.970857 | -1.591269 | 1.819585  |
| C  | -1.124876 | 0.819839  | 1.734713  |
| H  | -1.195183 | -1.948101 | 2.499819  |
| H  | -2.255056 | -2.433199 | 1.188124  |
| H  | -2.838305 | -1.287641 | 2.407761  |
| C  | -0.966838 | 0.823076  | 3.116087  |
| C  | -0.590872 | 1.984070  | 3.780684  |
| C  | -0.382993 | 3.158485  | 3.075710  |
| C  | -0.554269 | 3.168024  | 1.696877  |
| C  | -0.918478 | 2.007796  | 1.036744  |
| H  | -1.025366 | 2.027669  | -0.043115 |
| H  | -1.125173 | -0.083288 | 3.686770  |
| H  | -0.461672 | 1.964958  | 4.856997  |
| H  | -0.089859 | 4.063464  | 3.595456  |
| H  | -0.395698 | 4.080961  | 1.134134  |
| H  | -2.350891 | -0.124894 | 0.369224  |
| Si | -2.550530 | -0.402103 | -1.530964 |
| C  | -1.327955 | 0.092787  | -2.826783 |
| C  | -3.782762 | 0.955186  | -1.234430 |
| C  | -3.267076 | -2.101921 | -1.439382 |
| C  | -0.419021 | -0.956896 | -3.448626 |
| C  | -4.750171 | 0.802044  | -0.068506 |
| C  | -2.419999 | -3.352302 | -1.634362 |

|   |           |           |           |
|---|-----------|-----------|-----------|
| H | 0.242685  | -0.491638 | -4.181454 |
| H | -0.996780 | -1.725325 | -3.964185 |
| H | 0.207898  | -1.445468 | -2.702960 |
| H | -0.762457 | 0.946394  | -2.439386 |
| H | -1.995622 | 0.524752  | -3.590298 |
| H | -4.330366 | 0.984791  | -2.189670 |
| H | -3.240019 | 1.904372  | -1.183179 |
| H | -5.307625 | -0.134893 | -0.124570 |
| H | -5.473508 | 1.619682  | -0.063954 |
| H | -4.228236 | 0.824312  | 0.891414  |
| H | -4.009224 | -2.022267 | -2.253792 |
| H | -3.867563 | -2.161272 | -0.526464 |
| H | -1.842057 | -3.313816 | -2.557344 |
| H | -3.065222 | -4.231816 | -1.680993 |
| H | -1.721959 | -3.501808 | -0.809979 |

-----  
 Calculated energies and coordinates of **TS4** at PBE0-D4(CPCM=DCM)/def2-TZVP level of theory

|                         |     |                   |
|-------------------------|-----|-------------------|
| Electronic energy       | ... | -4529.34815297 Eh |
| Total Enthalpy          | ... | -4528.85730789 Eh |
| Final Gibbs free energy | ... | -4528.96362146 Eh |

CARTESIAN COORDINATES (ANGSTROEM)

|    |           |           |           |
|----|-----------|-----------|-----------|
| H  | 2.511085  | 0.285203  | -0.728478 |
| Ge | 0.208824  | 0.210682  | -1.189824 |
| O  | -0.485539 | -0.257040 | 0.495169  |
| O  | -1.540584 | -0.108511 | -1.802187 |
| C  | -1.848238 | -0.185632 | 0.583362  |
| C  | -2.429267 | -0.597468 | -0.883739 |
| C  | -2.283752 | -1.087524 | 1.785082  |
| C  | -2.182236 | 1.303999  | 0.963703  |
| C  | -2.475720 | -2.151797 | -1.108087 |
| C  | -3.844210 | -0.031462 | -1.247562 |
| F  | -3.607316 | -1.170226 | 1.904089  |
| F  | -1.812069 | -0.603642 | 2.935551  |
| F  | -1.801168 | -2.319826 | 1.676710  |
| F  | -3.465174 | 1.507382  | 1.257655  |
| F  | -1.842355 | 2.128335  | -0.029720 |
| F  | -1.466379 | 1.688157  | 2.017953  |
| F  | -2.638958 | -2.432617 | -2.399427 |
| F  | -3.463474 | -2.751402 | -0.440386 |
| F  | -1.324638 | -2.721656 | -0.755418 |
| F  | -4.282687 | -0.548702 | -2.397133 |
| F  | -3.812305 | 1.285035  | -1.420586 |
| F  | -4.761311 | -0.305012 | -0.321028 |
| C  | 1.392231  | -1.500908 | -1.559417 |
| C  | 2.721957  | -1.174395 | -1.137178 |
| H  | 1.277425  | -1.641464 | -2.632436 |
| H  | 0.882962  | -2.258874 | -0.975347 |
| C  | 3.205701  | -1.663611 | 0.173384  |
| C  | 3.723632  | -0.934498 | -2.229174 |
| H  | 3.247830  | -0.429518 | -3.070370 |
| H  | 4.091647  | -1.901582 | -2.588650 |
| H  | 4.581701  | -0.346874 | -1.904681 |
| C  | 2.314938  | -1.896656 | 1.226317  |
| C  | 2.772525  | -2.331385 | 2.456916  |
| C  | 4.128714  | -2.556180 | 2.662463  |
| C  | 5.020604  | -2.337859 | 1.623726  |
| C  | 4.565142  | -1.889950 | 0.392878  |
| H  | 1.255072  | -1.716196 | 1.094809  |
| H  | 2.065608  | -2.493790 | 3.262707  |
| H  | 4.485721  | -2.898489 | 3.627020  |
| H  | 6.080468  | -2.512265 | 1.770254  |
| H  | 5.280246  | -1.722283 | -0.401983 |
| Si | 2.701698  | 1.909124  | -0.602182 |
| C  | 1.461756  | 2.957289  | 0.341642  |
| C  | 3.050590  | 2.568028  | -2.322192 |
| C  | 4.303674  | 1.829404  | 0.383844  |
| H  | 1.112951  | 2.401315  | 1.217539  |
| H  | 0.585246  | 3.096518  | -0.297185 |
| C  | 2.031339  | 4.313143  | 0.757427  |
| H  | 4.762175  | 2.822837  | 0.293264  |
| H  | 4.994693  | 1.137371  | -0.107708 |
| C  | 4.136453  | 1.456913  | 1.854228  |

|   |          |          |           |
|---|----------|----------|-----------|
| H | 3.909796 | 2.024478 | -2.727538 |
| H | 3.409438 | 3.591242 | -2.144010 |
| C | 1.905551 | 2.590006 | -3.325977 |
| H | 2.369083 | 4.888338 | -0.108830 |
| H | 2.882603 | 4.208599 | 1.433734  |
| H | 1.274657 | 4.911142 | 1.272221  |
| H | 5.096149 | 1.469359 | 2.377840  |
| H | 3.713538 | 0.456957 | 1.968823  |
| H | 3.472808 | 2.153408 | 2.372460  |
| H | 2.191906 | 3.119436 | -4.238982 |
| H | 1.020909 | 3.086799 | -2.919344 |
| H | 1.607689 | 1.578498 | -3.613006 |

-----  
 Calculated energies and coordinates of **TS5** at PBE0-D4(CPCM=DCM)/def2-TZVP level of theory

|                         |     |                   |
|-------------------------|-----|-------------------|
| Electronic energy       | ... | -4529.33432713 Eh |
| Total Enthalpy          | ... | -4528.83959212 Eh |
| Final Gibbs free energy | ... | -4528.94643774 Eh |

CARTESIAN COORDINATES (ANGSTROEM)

|    |           |           |           |
|----|-----------|-----------|-----------|
| H  | 3.885854  | -0.297343 | -0.828542 |
| Ge | 0.874910  | 0.641874  | 0.422674  |
| O  | 0.077399  | -0.890503 | 1.151901  |
| O  | -0.840094 | 0.968708  | -0.300883 |
| C  | -1.265046 | -0.725725 | 1.357280  |
| C  | -1.823360 | 0.092791  | 0.056931  |
| C  | -1.870435 | -2.149170 | 1.608194  |
| C  | -1.429907 | 0.090456  | 2.696315  |
| C  | -2.072266 | -0.835980 | -1.186090 |
| C  | -3.134726 | 0.927035  | 0.272675  |
| F  | -3.201148 | -2.126946 | 1.665148  |
| F  | -1.433216 | -2.652978 | 2.764057  |
| F  | -1.514390 | -3.016233 | 0.669392  |
| F  | -2.689411 | 0.156722  | 3.124468  |
| F  | -0.971791 | 1.337082  | 2.557420  |
| F  | -0.704959 | -0.455610 | 3.669881  |
| F  | -2.169962 | -0.106163 | -2.296268 |
| F  | -3.188483 | -1.561302 | -1.081007 |
| F  | -1.057514 | -1.673170 | -1.391386 |
| F  | -3.586256 | 1.408266  | -0.888874 |
| F  | -2.917248 | 1.980558  | 1.051506  |
| F  | -4.125294 | 0.214968  | 0.807812  |
| C  | 1.768047  | -0.300568 | -1.293365 |
| C  | 3.093703  | -1.025996 | -1.034767 |
| H  | 1.727900  | 0.168562  | -2.279034 |
| H  | 0.960736  | -1.036807 | -1.326221 |
| C  | 2.971838  | -1.871302 | 0.212924  |
| C  | 3.525558  | -1.821482 | -2.262011 |
| H  | 3.682340  | -1.149788 | -3.109422 |
| H  | 2.760787  | -2.544344 | -2.554654 |
| H  | 4.456599  | -2.362674 | -2.074274 |
| C  | 2.355212  | -3.120057 | 0.188447  |
| C  | 2.197355  | -3.857249 | 1.350937  |
| C  | 2.647777  | -3.356011 | 2.565819  |
| C  | 3.263945  | -2.114942 | 2.604609  |
| C  | 3.426975  | -1.383393 | 1.434855  |
| H  | 1.985530  | -3.521918 | -0.174827 |
| H  | 1.715802  | -4.828142 | 1.310151  |
| H  | 2.520858  | -3.932666 | 3.475018  |
| H  | 3.626234  | -1.714374 | 3.544874  |
| H  | 3.927015  | -0.420940 | 1.473589  |
| Si | 2.506809  | 2.127985  | -0.897191 |
| C  | 1.111886  | 3.365918  | -1.078539 |
| C  | 3.446015  | 1.991526  | -2.511912 |
| C  | 3.774284  | 2.435001  | 0.437571  |
| H  | 0.588907  | 3.485068  | -0.128361 |
| H  | 0.381310  | 2.986985  | -1.798549 |
| C  | 1.684859  | 4.711136  | -1.541141 |
| H  | 4.312793  | 3.296108  | 0.011957  |
| H  | 4.499765  | 1.615391  | 0.422533  |
| C  | 3.312913  | 2.750053  | 1.848894  |
| H  | 4.170826  | 1.175074  | -2.462789 |
| H  | 4.051047  | 2.909636  | -2.464645 |
| C  | 2.671458  | 1.963532  | -3.822673 |

|   |          |          |           |
|---|----------|----------|-----------|
| H | 2.168301 | 4.642261 | -2.517336 |
| H | 2.416718 | 5.103847 | -0.831063 |
| H | 0.879620 | 5.445088 | -1.623233 |
| H | 4.153487 | 3.088085 | 2.460207  |
| H | 2.876349 | 1.871712 | 2.327528  |
| H | 2.553831 | 3.535775 | 1.857508  |
| H | 3.347887 | 2.099164 | -4.669884 |
| H | 1.919545 | 2.753907 | -3.871335 |
| H | 2.155886 | 1.013206 | -3.976341 |

-----  
 Calculated energies and coordinates of **TS6** at PBE0-D4(CPCM=DCM)/def2-TZVP level of theory

|                         |     |                   |
|-------------------------|-----|-------------------|
| Electronic energy       | ... | -4180.62860727 Eh |
| Total Enthalpy          | ... | -4180.31071973 Eh |
| Final Gibbs free energy | ... | -4180.39985862 Eh |

CARTESIAN COORDINATES (ANGSTROEM)

|    |           |           |           |
|----|-----------|-----------|-----------|
| Ge | -0.122363 | 0.655842  | -0.399763 |
| O  | -1.451412 | 0.880317  | 0.871655  |
| O  | -1.253337 | -0.511568 | -1.268521 |
| C  | -2.678390 | 0.466954  | 0.412201  |
| C  | -2.400758 | -0.802205 | -0.570017 |
| C  | -3.575869 | 0.194918  | 1.667455  |
| C  | -3.293082 | 1.696341  | -0.356160 |
| C  | -2.125572 | -2.129781 | 0.226382  |
| C  | -3.497326 | -1.107888 | -1.645813 |
| F  | -3.009230 | -0.657118 | 2.510953  |
| F  | -4.769499 | -0.287892 | 1.329884  |
| F  | -3.780227 | 1.319333  | 2.352869  |
| F  | -4.562265 | 1.517273  | -0.712734 |
| F  | -2.576444 | 1.969115  | -1.450464 |
| F  | -3.238737 | 2.790162  | 0.397898  |
| F  | -1.578471 | -3.043389 | -0.572050 |
| F  | -3.235878 | -2.661210 | 0.738935  |
| F  | -1.257639 | -1.933829 | 1.214863  |
| F  | -3.199312 | -2.224234 | -2.312094 |
| F  | -3.572530 | -0.139871 | -2.550893 |
| F  | -4.704660 | -1.273567 | -1.113406 |
| Si | 2.366104  | 0.456902  | -0.238710 |
| C  | 2.965073  | 1.987297  | -1.132346 |
| C  | 2.739180  | -1.056869 | -1.263117 |
| C  | 2.865584  | 0.532424  | 1.555224  |
| H  | 2.599345  | 1.937268  | -2.162545 |
| H  | 4.057517  | 1.863120  | -1.182696 |
| C  | 2.609809  | 3.318143  | -0.486850 |
| H  | 2.273982  | 1.321957  | 2.032744  |
| H  | 3.893096  | 0.921137  | 1.524258  |
| C  | 2.799294  | -0.758492 | 2.358543  |
| H  | 3.828680  | -1.153216 | -1.137821 |
| H  | 2.592572  | -0.778780 | -2.311828 |
| C  | 2.049338  | -2.375706 | -0.947488 |
| H  | 2.996496  | 4.155869  | -1.071889 |
| H  | 3.022019  | 3.400344  | 0.521490  |
| H  | 1.524811  | 3.440307  | -0.413768 |
| H  | 3.122290  | -0.590426 | 3.388624  |
| H  | 3.442421  | -1.530555 | 1.930507  |
| H  | 1.781425  | -1.154567 | 2.390184  |
| H  | 0.979412  | -2.321315 | -1.156439 |
| H  | 2.167068  | -2.656826 | 0.100192  |
| H  | 2.464229  | -3.180727 | -1.559086 |
| H  | 0.743254  | -0.494990 | 0.491639  |

-----  
 Calculated energies and coordinates of Compound **TS7** at PBE0-D4(CPCM=DCM)/def2-TZVP level of theory

|                         |     |                   |
|-------------------------|-----|-------------------|
| Electronic energy       | ... | -4180.62859703 Eh |
| Total Enthalpy          | ... | -4180.31011627 Eh |
| Final Gibbs free energy | ... | -4180.39745030 Eh |

CARTESIAN COORDINATES (ANGSTROEM)

|    |           |           |           |
|----|-----------|-----------|-----------|
| Ge | 0.564790  | 1.816858  | -0.702186 |
| O  | -1.052986 | 1.443030  | 0.160461  |
| O  | 0.693344  | -0.201719 | -0.718255 |

C -1.627616 0.265784 -0.218156  
 C -0.424390 -0.841220 -0.211522  
 C -2.841215 0.023201 0.752423  
 C -2.225224 0.480117 -1.660086  
 C -0.131448 -1.292348 1.260820  
 C -0.661205 -2.125355 -1.079289  
 F -3.392994 -1.177338 0.607041  
 F -3.798817 0.923925 0.526354  
 F -2.484659 0.171575 2.022066  
 F -2.933378 1.602803 -1.711141  
 F -3.009381 -0.515350 -2.061170  
 F -1.240985 0.629071 -2.555128  
 F 0.986955 -2.014616 1.333110  
 F -1.107289 -2.039622 1.767025  
 F 0.060662 -0.237832 2.046975  
 F -0.631196 -1.840688 -2.374642  
 F -1.823395 -2.712085 -0.808683  
 F 0.294402 -3.031061 -0.868040  
 Si 2.769894 0.104701 0.022883  
 C 3.187087 -1.577825 -0.705700  
 C 3.384190 0.135249 1.798992  
 C 3.529807 1.325607 -1.189219  
 H 2.949866 -1.534103 -1.773771  
 H 2.573301 -2.369783 -0.283519  
 C 4.666499 -1.917765 -0.504681  
 H 2.910867 1.386627 -2.094250  
 H 4.435665 0.806450 -1.525707  
 C 3.875896 2.712348 -0.671301  
 H 4.472483 0.038963 1.677521  
 H 3.060874 -0.799039 2.267645  
 C 3.055079 1.327396 2.682252  
 H 4.924901 -2.835804 -1.039013  
 H 4.900777 -2.077931 0.549977  
 H 5.332425 -1.132769 -0.873597  
 H 4.592312 2.661777 0.151311  
 H 2.995212 3.246585 -0.301181  
 H 4.316507 3.326276 -1.460347  
 H 3.531872 1.228784 3.660983  
 H 1.978790 1.415249 2.844276  
 H 3.396155 2.265428 2.240318  
 H 1.645551 1.434656 0.567801

F -0.018462 -0.547046 -4.996035  
 C -0.024080 -2.316203 2.211892  
 C -1.336794 -1.368343 2.367264  
 C -0.125935 -3.745254 2.849795  
 F -1.021559 -4.495322 2.228909  
 F -0.445799 -3.672212 4.136271  
 F 1.036597 -4.380842 2.755690  
 C 1.294757 -1.642721 2.738615  
 F 1.326444 -1.551276 4.061114  
 F 1.416959 -0.425161 2.212488  
 F 2.360282 -2.325379 2.345478  
 C -2.686968 -2.164123 2.206038  
 F -2.634064 -2.920917 1.109659  
 F -3.702097 -1.330245 2.033719  
 F -2.956468 -2.931974 3.252465  
 C -1.431495 -0.503302 3.670139  
 F -2.583674 0.158449 3.698454  
 F -0.467853 0.401840 3.726653  
 F -1.369677 -1.261409 4.757475  
 Si 1.227036 2.219833 0.337895  
 C 1.009431 2.879192 2.080832  
 C 0.533085 3.414844 -0.928685  
 C 3.025881 1.799177 0.018874  
 H -0.060668 2.936896 2.304568  
 C 1.668889 4.243458 2.283469  
 H 1.427666 2.151454 2.782293  
 H 1.250907 4.997710 1.611542  
 H 2.745093 4.201505 2.096455  
 H 1.529672 4.603659 3.306233  
 C -0.859254 3.942502 -0.591386  
 H 0.533351 2.927764 -1.907696  
 H 1.243097 4.247251 -1.008964  
 H -1.579838 3.130474 -0.467877  
 H -1.238959 4.600469 -1.377600  
 H -0.853564 4.514172 0.339847  
 H 3.339558 1.071010 0.774943  
 H 3.589018 2.715141 0.238829  
 C 3.373469 1.299071 -1.378800  
 H 2.886813 0.346501 -1.591954  
 H 4.450952 1.150693 -1.490793  
 H 3.059170 2.007232 -2.149742  
 H 0.405589 0.942889 0.234055

-----  
 Calculated Energies and Coordinates **TS(1\_INT\_A\_Ge)** at PBE0-D4(CPCM=DCM)/def2-TZVP level of theory

Electronic energy ... -5757.08372525 Eh  
 Total Enthalpy ... -5756.66273811 Eh  
 Final Gibbs free energy ... -5756.78633436 Eh

CARTESIAN COORDINATES (ANGSTROEM)

Ge -0.535373 -1.190453 -0.126389  
 O -1.822951 -1.727008 -1.232043  
 O 0.512519 -0.756597 -1.495006  
 O 0.180943 -2.490850 0.847071  
 O -1.311169 -0.466543 1.302332  
 C -1.596541 -1.322465 -2.537857  
 C 0.009079 -1.238211 -2.706577  
 C -2.350398 -2.337885 -3.461572  
 F -1.994644 -3.586542 -3.203714  
 F -2.123115 -2.086277 -4.744668  
 F -3.660419 -2.262569 -3.254875  
 C -2.301220 0.079494 -2.646686  
 F -2.308151 0.572710 -3.874807  
 F -1.683322 0.942933 -1.831826  
 F -3.553032 0.003119 -2.222344  
 C 0.682579 -2.644780 -2.896612  
 F 1.991534 -2.557781 -2.708829  
 F 0.469146 -3.148992 -4.104259  
 F 0.227252 -3.495762 -1.976011  
 C 0.536701 -0.274842 -3.822234  
 F 1.851588 -0.390661 -3.961470  
 F 0.287364 0.989445 -3.516241

-----  
 Calculated energies and coordinates of **INT\_A\_Ge** at PBE0-D4(CPCM=DCM)/def2-TZVP level of theory

Electronic energy ... -5757.09570753 Eh  
 Total Enthalpy ... -5756.67461003 Eh  
 Final Gibbs free energy ... -5756.79886433 Eh

CARTESIAN COORDINATES (ANGSTROEM)

Ge 0.015597 -0.722304 -0.120794  
 O -1.398932 -0.591784 -1.236586  
 O 0.992150 -1.313797 -1.572943  
 O 0.435506 -2.208049 0.821362  
 O -0.881873 -0.150836 1.388464  
 C -1.133817 -0.850896 -2.567280  
 C 0.201547 -1.771123 -2.597805  
 C -2.435656 -1.462824 -3.184545  
 F -2.861678 -2.516250 -2.504908  
 F -2.257832 -1.825779 -4.451639  
 F -3.421693 -0.567307 -3.157510  
 C -0.908000 0.551005 -3.235284  
 F -0.836315 0.494030 -4.560540  
 F 0.214843 1.102301 -2.773441  
 F -1.888706 1.388851 -2.917890  
 C -0.100244 -3.290898 -2.304331  
 F 1.021446 -3.934174 -1.999098  
 F -0.660089 -3.911743 -3.342168  
 F -0.902102 -3.422906 -1.253107  
 C 1.054579 -1.719905 -3.911958  
 F 2.034386 -2.620955 -3.863006  
 F 1.634999 -0.539605 -4.078967  
 F 0.325333 -1.983707 -4.992301  
 C 0.089007 -2.209552 2.151924

|    |           |           |           |
|----|-----------|-----------|-----------|
| C  | -1.123728 | -1.134966 | 2.312945  |
| C  | -0.240514 | -3.686801 | 2.552149  |
| F  | -1.159946 | -4.219955 | 1.761244  |
| F  | -0.669812 | -3.763592 | 3.809355  |
| F  | 0.838902  | -4.458989 | 2.450054  |
| C  | 1.406515  | -1.787273 | 2.893455  |
| F  | 1.321262  | -1.858735 | 4.216723  |
| F  | 1.737390  | -0.542088 | 2.543364  |
| F  | 2.422233  | -2.553919 | 2.514036  |
| C  | -2.535497 | -1.727517 | 1.941977  |
| F  | -2.483485 | -2.331113 | 0.757603  |
| F  | -3.425688 | -0.747307 | 1.819988  |
| F  | -3.003750 | -2.588491 | 2.841968  |
| C  | -1.248282 | -0.449745 | 3.714915  |
| F  | -2.280378 | 0.390332  | 3.733931  |
| F  | -0.176230 | 0.272925  | 4.015229  |
| F  | -1.431643 | -1.340197 | 4.685551  |
| Si | 1.204626  | 2.395770  | 0.280904  |
| C  | 1.195665  | 2.505449  | 2.128245  |
| C  | -0.211393 | 3.273932  | -0.525560 |
| C  | 2.878649  | 2.508716  | -0.502110 |
| H  | 0.273706  | 2.063394  | 2.505875  |
| C  | 1.293524  | 3.975865  | 2.562824  |
| H  | 2.026415  | 1.927345  | 2.537403  |
| H  | 0.440275  | 4.559275  | 2.209991  |
| H  | 2.203857  | 4.454342  | 2.194018  |
| H  | 1.306619  | 4.037495  | 3.652989  |
| C  | -1.600713 | 2.996212  | 0.041489  |
| H  | -0.176679 | 3.144937  | -1.607248 |
| H  | 0.060544  | 4.327476  | -0.349652 |
| H  | -1.920453 | 1.972162  | -0.156193 |
| H  | -2.335329 | 3.664153  | -0.412627 |
| H  | -1.633972 | 3.150272  | 1.122025  |
| H  | 3.524155  | 1.778853  | -0.002759 |
| H  | 3.231660  | 3.493570  | -0.157717 |
| C  | 2.982243  | 2.404950  | -2.018187 |
| H  | 2.740156  | 1.399024  | -2.362657 |
| H  | 3.998678  | 2.632915  | -2.345474 |
| H  | 2.308078  | 3.102896  | -2.518728 |
| H  | 0.909681  | 0.663844  | -0.048971 |

-----  
 Calculated energies and coordinates of **TS(INT\_A\_3\*\_Ge)** at PBE0-D4(CPCM=DCM)/def2-TZVP level of theory

|                         |     |                   |
|-------------------------|-----|-------------------|
| Electronic energy       | ... | -5757.08459280 Eh |
| Total Enthalpy          | ... | -5756.66407390 Eh |
| Final Gibbs free energy | ... | -5756.78714612 Eh |

CARTESIAN COORDINATES (ANGSTROEM)

|    |           |           |           |
|----|-----------|-----------|-----------|
| Ge | 0.265890  | -0.756781 | -0.339418 |
| O  | -1.235576 | -0.560912 | -1.340652 |
| O  | 1.018782  | -1.580589 | -1.826779 |
| O  | 0.462542  | -2.263455 | 0.640955  |
| O  | -0.487279 | -0.020863 | 1.256706  |
| C  | -1.107212 | -0.881543 | -2.675411 |
| C  | 0.121138  | -1.945845 | -2.787803 |
| C  | -2.511172 | -1.364632 | -3.170540 |
| F  | -2.976477 | -2.380548 | -2.459740 |
| F  | -2.475054 | -1.733341 | -4.448898 |
| F  | -3.411113 | -0.387605 | -3.057971 |
| C  | -0.788653 | 0.471420  | -3.406030 |
| F  | -0.779158 | 0.374684  | -4.730379 |
| F  | 0.396169  | 0.939913  | -3.005079 |
| F  | -1.680929 | 1.404272  | -3.080820 |
| C  | -0.314889 | -3.423424 | -2.462981 |
| F  | 0.755957  | -4.177252 | -2.227850 |
| F  | -0.998824 | -3.991265 | -3.458712 |
| F  | -1.052057 | -3.474272 | -1.359440 |
| C  | 0.890470  | -1.979548 | -4.155193 |
| F  | 1.787089  | -2.966183 | -4.159688 |
| F  | 1.571808  | -0.859892 | -4.365894 |
| F  | 0.080996  | -2.175825 | -5.193622 |
| C  | 0.234202  | -2.177195 | 1.990200  |
| C  | -0.816842 | -0.954973 | 2.206924  |
| C  | -0.231846 | -3.596096 | 2.458366  |

|    |           |           |           |
|----|-----------|-----------|-----------|
| F  | -1.277477 | -4.020838 | 1.763728  |
| F  | -0.551047 | -3.617787 | 3.749495  |
| F  | 0.737249  | -4.491334 | 2.272876  |
| C  | 1.648904  | -1.899470 | 2.617680  |
| F  | 1.669373  | -1.985273 | 3.943667  |
| F  | 2.084999  | -0.687138 | 2.256421  |
| F  | 2.542976  | -2.761034 | 2.144400  |
| C  | -2.310913 | -1.360394 | 1.922291  |
| F  | -2.417712 | -2.006373 | 0.768087  |
| F  | -3.064061 | -0.267605 | 1.813385  |
| F  | -2.839771 | -2.116304 | 2.883673  |
| C  | -0.786982 | -0.297834 | 3.625986  |
| F  | -1.716264 | 0.653894  | 3.727230  |
| F  | 0.377875  | 0.283505  | 3.879098  |
| F  | -1.015220 | -1.181926 | 4.591928  |
| Si | 0.959383  | 2.367195  | 0.761840  |
| C  | 0.738699  | 2.832968  | 2.528199  |
| C  | -0.362605 | 2.923604  | -0.387419 |
| C  | 2.720677  | 2.377399  | 0.200139  |
| H  | -0.245511 | 2.539716  | 2.889903  |
| C  | 0.881907  | 4.367123  | 2.579788  |
| H  | 1.493724  | 2.355697  | 3.153293  |
| H  | 0.121537  | 4.870243  | 1.978166  |
| H  | 1.863789  | 4.705288  | 2.241541  |
| H  | 0.757504  | 4.700572  | 3.611981  |
| C  | -1.801720 | 2.845643  | 0.106050  |
| H  | -0.233491 | 2.469751  | -1.368326 |
| H  | -0.060638 | 3.977467  | -0.526365 |
| H  | -2.127096 | 1.811037  | 0.211352  |
| H  | -2.467123 | 3.340955  | -0.603245 |
| H  | -1.922045 | 3.335378  | 1.074447  |
| H  | 3.265186  | 1.622120  | 0.777090  |
| H  | 3.071950  | 3.344041  | 0.595759  |
| C  | 3.007234  | 2.271595  | -1.290215 |
| H  | 2.744564  | 1.286926  | -1.681255 |
| H  | 4.071260  | 2.425097  | -1.479451 |
| H  | 2.454416  | 3.018502  | -1.863086 |
| H  | 1.268505  | 0.429344  | -0.310383 |

-----  
 Calculated Energies and Coordinates **TS(1\_INT\_A\_Si)** at PBE0-D4(CPCM=DCM)/def2-TZVP level of theory

|                         |     |                   |
|-------------------------|-----|-------------------|
| Electronic energy       | ... | -3969.80591658 Eh |
| Total Enthalpy          | ... | -3969.38299325 Eh |
| Final Gibbs free energy | ... | -3969.50463621 Eh |

CARTESIAN COORDINATES (ANGSTROEM)

|    |           |           |           |
|----|-----------|-----------|-----------|
| Si | -0.488255 | -1.038130 | -0.110509 |
| O  | -1.777341 | -1.420063 | -1.084116 |
| O  | 0.519356  | -0.757576 | -1.409744 |
| O  | 0.249532  | -2.263897 | 0.722447  |
| O  | -1.247174 | -0.433298 | 1.247001  |
| C  | -1.574941 | -1.204818 | -2.437453 |
| C  | 0.024802  | -1.263665 | -2.611367 |
| C  | -2.418798 | -2.251351 | -3.238079 |
| F  | -2.188729 | -3.488485 | -2.826741 |
| F  | -2.153629 | -2.177139 | -4.537683 |
| F  | -3.717640 | -2.028566 | -3.072535 |
| C  | -2.176679 | 0.223644  | -2.693736 |
| F  | -2.166915 | 0.566237  | -3.973412 |
| F  | -1.485332 | 1.122506  | -1.993329 |
| F  | -3.424228 | 0.293542  | -2.253241 |
| C  | 0.590241  | -2.727516 | -2.708403 |
| F  | 1.903484  | -2.726126 | -2.524113 |
| F  | 0.332506  | -3.288694 | -3.882390 |
| F  | 0.076678  | -3.483955 | -1.742486 |
| C  | 0.636630  | -0.426995 | -3.783686 |
| F  | 1.941355  | -0.648185 | -3.893127 |
| F  | 0.480976  | 0.872519  | -3.584752 |
| F  | 0.073067  | -0.751707 | -4.941645 |
| C  | 0.040283  | -2.256574 | 2.094849  |
| C  | -1.284437 | -1.345658 | 2.299107  |
| C  | -0.044122 | -3.740534 | 2.592818  |
| F  | -0.909931 | -4.450603 | 1.888612  |

|    |           |           |           |
|----|-----------|-----------|-----------|
| F  | -0.394255 | -3.781478 | 3.873597  |
| F  | 1.129875  | -4.349270 | 2.471967  |
| C  | 1.348229  | -1.619569 | 2.692564  |
| F  | 1.358311  | -1.630650 | 4.018667  |
| F  | 1.476025  | -0.365784 | 2.265364  |
| F  | 2.423427  | -2.265790 | 2.264326  |
| C  | -2.634830 | -2.141588 | 2.118045  |
| F  | -2.599318 | -2.870866 | 1.007732  |
| F  | -3.648923 | -1.298605 | 1.978688  |
| F  | -2.895050 | -2.937045 | 3.147771  |
| C  | -1.386742 | -0.537126 | 3.635116  |
| F  | -2.539572 | 0.120813  | 3.694955  |
| F  | -0.426739 | 0.366702  | 3.743578  |
| F  | -1.323402 | -1.351601 | 4.682316  |
| Si | 1.168159  | 2.185825  | 0.333294  |
| C  | 0.908528  | 2.829437  | 2.073744  |
| C  | 0.477162  | 3.376507  | -0.935878 |
| C  | 2.970019  | 1.776083  | 0.034033  |
| H  | -0.165748 | 2.869690  | 2.279604  |
| C  | 1.542416  | 4.205433  | 2.284482  |
| H  | 1.329313  | 2.111797  | 2.782282  |
| H  | 1.126472  | 4.952605  | 1.603819  |
| H  | 2.622708  | 4.179640  | 2.120213  |
| H  | 1.375979  | 4.563229  | 3.303852  |
| C  | -0.904988 | 3.929456  | -0.595970 |
| H  | 0.471876  | 2.890836  | -1.915183 |
| H  | 1.201384  | 4.197060  | -1.015447 |
| H  | -1.639066 | 3.132099  | -0.460578 |
| H  | -1.276235 | 4.585792  | -1.387346 |
| H  | -0.884346 | 4.510678  | 0.328848  |
| H  | 3.285228  | 1.052911  | 0.793439  |
| C  | 3.514901  | 2.701271  | 0.262742  |
| C  | 3.342562  | 1.284249  | -1.360086 |
| H  | 2.889659  | 0.315155  | -1.570953 |
| H  | 4.425086  | 1.172097  | -1.462814 |
| H  | 3.010024  | 1.978609  | -2.135685 |
| H  | 0.355980  | 0.887426  | 0.210418  |

-----  
 Calculated energies and coordinates of INT\_A\_Si at PBE0-D4(CPCM=DCM)/def2-TZVP level of theory

|                         |     |                   |
|-------------------------|-----|-------------------|
| Electronic energy       | ... | -3969.80988667 Eh |
| Total Enthalpy          | ... | -3969.38569342 Eh |
| Final Gibbs free energy | ... | -3969.50849320 Eh |

CARTESIAN COORDINATES (ANGSTROEM)

|    |           |           |           |
|----|-----------|-----------|-----------|
| Si | -0.049211 | -0.716556 | -0.107526 |
| O  | -1.363990 | -0.588310 | -1.141505 |
| O  | 0.947879  | -1.166112 | -1.437573 |
| O  | 0.376994  | -2.107496 | 0.735100  |
| O  | -0.856516 | -0.141775 | 1.297133  |
| C  | -1.136561 | -0.855399 | -2.482093 |
| C  | 0.241958  | -1.695020 | -2.495914 |
| C  | -2.413801 | -1.544256 | -3.078750 |
| F  | -2.880919 | -2.498511 | -2.291761 |
| F  | -2.159561 | -2.068202 | -4.274177 |
| F  | -3.400969 | -0.662594 | -3.232810 |
| C  | -0.991580 | 0.542343  | -3.176315 |
| F  | -0.980883 | 0.449260  | -4.502169 |
| F  | 0.129229  | 1.143581  | -2.786464 |
| F  | -1.986225 | 1.348207  | -2.825924 |
| C  | 0.045013  | -3.237534 | -2.212367 |
| F  | 1.185936  | -3.766846 | -1.787788 |
| F  | -0.341930 | -3.903030 | -3.299598 |
| F  | -0.851099 | -3.452899 | -1.257802 |
| C  | 1.125370  | -1.605322 | -3.789641 |
| F  | 2.119427  | -2.490324 | -3.730242 |
| F  | 1.687076  | -0.415477 | -3.937182 |
| F  | 0.418352  | -1.870487 | -4.883974 |
| C  | 0.055311  | -2.180091 | 2.072753  |
| C  | -1.127673 | -1.094417 | 2.254850  |
| C  | -0.283053 | -3.664891 | 2.430289  |
| F  | -1.270366 | -4.151424 | 1.694896  |
| F  | -0.621661 | -3.770702 | 3.713529  |
| F  | 0.766435  | -4.453265 | 2.217768  |

|    |           |           |           |
|----|-----------|-----------|-----------|
| C  | 1.397928  | -1.808350 | 2.801129  |
| F  | 1.328162  | -1.897631 | 4.122945  |
| F  | 1.764150  | -0.571360 | 2.464684  |
| F  | 2.379977  | -2.602725 | 2.392537  |
| C  | -2.563543 | -1.647292 | 1.912099  |
| F  | -2.560507 | -2.254555 | 0.730595  |
| F  | -3.423822 | -0.639024 | 1.809488  |
| F  | -3.032061 | -2.490614 | 2.827632  |
| C  | -1.213297 | -0.402175 | 3.654750  |
| F  | -2.213369 | 0.473712  | 3.690588  |
| F  | -0.113127 | 0.275520  | 3.951134  |
| F  | -1.417064 | -1.298808 | 4.616422  |
| Si | 1.132367  | 2.286525  | 0.268273  |
| C  | 1.147768  | 2.473221  | 2.111764  |
| C  | -0.248935 | 3.241036  | -0.520465 |
| C  | 2.820349  | 2.405439  | -0.491148 |
| H  | 0.195637  | 2.130311  | 2.515291  |
| C  | 1.373304  | 3.944347  | 2.482577  |
| H  | 1.928788  | 1.847813  | 2.547029  |
| H  | 0.576872  | 4.586565  | 2.099888  |
| H  | 2.323336  | 4.324808  | 2.099664  |
| H  | 1.389173  | 4.056046  | 3.569010  |
| C  | -1.640834 | 3.002515  | 0.058438  |
| H  | -0.236112 | 3.119126  | -1.602846 |
| H  | 0.057444  | 4.282536  | -0.340473 |
| H  | -1.985244 | 1.984187  | -0.126032 |
| H  | -2.364599 | 3.683283  | -0.394697 |
| H  | -1.662034 | 3.167032  | 1.137869  |
| H  | 3.451595  | 1.662489  | 0.008169  |
| H  | 3.182637  | 3.381738  | -0.137678 |
| C  | 2.943387  | 2.308003  | -2.005649 |
| H  | 2.689178  | 1.308683  | -2.358506 |
| H  | 3.966900  | 2.521593  | -2.321331 |
| H  | 2.285739  | 3.018307  | -2.511169 |
| H  | 0.801752  | 0.676186  | -0.038931 |

-----  
 Calculated energies and coordinates of TS(INT\_A\_3\*\_Si) at PBE0-D4(CPCM=DCM)/def2-TZVP level of theory

|                         |     |                   |
|-------------------------|-----|-------------------|
| Electronic energy       | ... | -3969.79415802 Eh |
| Total Enthalpy          | ... | -3969.37080317 Eh |
| Final Gibbs free energy | ... | -3969.49109157 Eh |

CARTESIAN COORDINATES (ANGSTROEM)

|    |           |           |           |
|----|-----------|-----------|-----------|
| Si | 0.247401  | -0.734093 | -0.346059 |
| O  | -1.158133 | -0.502826 | -1.251995 |
| O  | 0.997394  | -1.464050 | -1.730886 |
| O  | 0.485499  | -2.128988 | 0.561835  |
| O  | -0.400078 | 0.017716  | 1.169952  |
| C  | -1.101288 | -0.841283 | -2.592624 |
| C  | 0.134108  | -1.882255 | -2.706634 |
| C  | -2.511962 | -1.355414 | -3.040317 |
| F  | -2.980367 | -2.305503 | -2.247408 |
| F  | -2.465905 | -1.830059 | -4.283239 |
| F  | -3.412996 | -0.374486 | -3.017395 |
| C  | -0.825653 | 0.501645  | -3.356974 |
| F  | -0.868688 | 0.363263  | -4.677437 |
| F  | 0.366132  | 0.992782  | -3.019646 |
| F  | -1.717300 | 1.428422  | -3.017859 |
| C  | -0.267278 | -3.371218 | -2.371763 |
| F  | 0.819251  | -4.090774 | -2.108004 |
| F  | -0.917785 | -3.963550 | -3.374725 |
| F  | -1.027444 | -3.436851 | -1.286561 |
| C  | 0.915969  | -1.919942 | -4.067219 |
| F  | 1.826696  | -2.892938 | -4.050462 |
| F  | 1.580033  | -0.794903 | -4.294366 |
| F  | 0.111461  | -2.144876 | -5.103112 |
| C  | 0.254993  | -2.118174 | 1.914868  |
| C  | -0.765783 | -0.890982 | 2.150469  |
| C  | -0.237498 | -3.546049 | 2.328654  |
| F  | -1.298757 | -3.922624 | 1.632003  |
| F  | -0.544339 | -3.602925 | 3.621306  |
| F  | 0.710373  | -4.451772 | 2.100318  |
| C  | 1.678414  | -1.893511 | 2.547791  |
| F  | 1.694242  | -2.026084 | 3.868839  |

|    |           |           |           |
|----|-----------|-----------|-----------|
| F  | 2.140594  | -0.681280 | 2.226821  |
| F  | 2.548527  | -2.760077 | 2.043272  |
| C  | -2.277712 | -1.245720 | 1.877982  |
| F  | -2.425954 | -1.892541 | 0.732005  |
| F  | -2.987621 | -0.125178 | 1.776544  |
| F  | -2.815998 | -1.979900 | 2.849433  |
| C  | -0.712168 | -0.261323 | 3.580561  |
| F  | -1.620525 | 0.703718  | 3.715466  |
| F  | 0.467283  | 0.277754  | 3.848267  |
| F  | -0.955571 | -1.175094 | 4.514107  |
| Si | 0.888703  | 2.179435  | 0.762564  |
| C  | 0.673695  | 2.761607  | 2.508810  |
| C  | -0.370678 | 2.869699  | -0.391880 |
| C  | 2.676305  | 2.231725  | 0.263019  |
| H  | -0.300699 | 2.488523  | 2.904486  |
| C  | 0.807772  | 4.294495  | 2.485662  |
| H  | 1.440608  | 2.327069  | 3.147115  |
| H  | 0.009651  | 4.766069  | 1.909213  |
| H  | 1.764108  | 4.628584  | 2.076710  |
| H  | 0.742449  | 4.671624  | 3.508502  |
| C  | -1.832886 | 2.764520  | 0.020649  |
| H  | -0.200608 | 2.515932  | -1.405737 |
| H  | -0.054498 | 3.926750  | -0.402928 |
| H  | -2.180878 | 1.733902  | -0.031697 |
| H  | -2.456318 | 3.367190  | -0.642659 |
| H  | -1.991308 | 3.120610  | 1.040947  |
| H  | 3.208733  | 1.459451  | 0.828013  |
| H  | 3.014523  | 3.186872  | 0.690573  |
| C  | 3.001206  | 2.164026  | -1.221293 |
| H  | 2.724409  | 1.199051  | -1.650345 |
| H  | 4.073032  | 2.298053  | -1.381053 |
| H  | 2.480639  | 2.941714  | -1.783921 |
| H  | 1.200470  | 0.425046  | -0.347560 |

-----  
 Calculated energies and coordinates of Et<sub>3</sub>SiH at PBE0-D4(CPCM=DCM)/def2-TZVP level of theory

|                         |     |                  |
|-------------------------|-----|------------------|
| Electronic energy       | ... | -527.47794089 Eh |
| Total Enthalpy          | ... | -527.26095375 Eh |
| Final Gibbs free energy | ... | -527.30955265 Eh |

CARTESIAN COORDINATES (ANGSTROEM)

|    |            |           |           |
|----|------------|-----------|-----------|
| Si | -8.707706  | 2.248089  | 0.288698  |
| C  | -7.234249  | 3.042892  | -0.567388 |
| C  | -8.214948  | 1.534636  | 1.957132  |
| C  | -9.481178  | 0.928363  | -0.804467 |
| H  | -6.778513  | 3.754545  | 0.130201  |
| H  | -6.481327  | 2.263204  | -0.735862 |
| C  | -7.574093  | 3.742204  | -1.881307 |
| H  | -6.691688  | 4.202032  | -2.335238 |
| H  | -8.314517  | 4.533037  | -1.730941 |
| H  | -7.990147  | 3.043610  | -2.611965 |
| C  | -7.632872  | 2.554894  | 2.932329  |
| H  | -7.495592  | 0.726216  | 1.777728  |
| H  | -9.098530  | 1.056767  | 2.395249  |
| H  | -6.718508  | 3.007973  | 2.540457  |
| H  | -7.384981  | 2.099172  | 3.895122  |
| H  | -8.339662  | 3.366803  | 3.125920  |
| H  | -8.723534  | 0.156064  | -0.985384 |
| H  | -9.689126  | 1.378868  | -1.781717 |
| C  | -10.751932 | 0.300611  | -0.238168 |
| H  | -11.523184 | 1.055987  | -0.062494 |
| H  | -11.173081 | -0.445101 | -0.918449 |
| H  | -10.563209 | -0.197908 | 0.716313  |
| H  | -9.735931  | 3.317661  | 0.523044  |

-----  
 Calculated energies and coordinates of Et<sub>3</sub>SiH at PBE0-D4(CPCM=acetonitrile)/def2-TZVP level of theory

|                         |     |                  |
|-------------------------|-----|------------------|
| Electronic energy       | ... | -527.47814599 Eh |
| Total Enthalpy          | ... | -527.26125033 Eh |
| Final Gibbs free energy | ... | -527.30985532 Eh |

CARTESIAN COORDINATES (ANGSTROEM)

|    |            |           |           |
|----|------------|-----------|-----------|
| Si | -8.705984  | 2.246198  | 0.288291  |
| C  | -7.233612  | 3.041709  | -0.568696 |
| C  | -8.213177  | 1.534256  | 1.957173  |
| C  | -9.480123  | 0.926167  | -0.803774 |
| H  | -6.775647  | 3.751207  | 0.129647  |
| H  | -6.482312  | 2.261104  | -0.740176 |
| C  | -7.575179  | 3.744009  | -1.880642 |
| H  | -6.692733  | 4.202391  | -2.336049 |
| H  | -8.313209  | 4.536525  | -1.727056 |
| H  | -7.994939  | 3.047543  | -2.611248 |
| C  | -7.633971  | 2.555687  | 2.932901  |
| H  | -7.491701  | 0.727750  | 1.777621  |
| H  | -9.095948  | 1.054043  | 2.394402  |
| H  | -6.720985  | 3.011617  | 2.541076  |
| H  | -7.384746  | 2.099998  | 3.895411  |
| H  | -8.343130  | 3.365451  | 3.127080  |
| H  | -8.723292  | 0.152198  | -0.980955 |
| H  | -9.684893  | 1.375018  | -1.782474 |
| C  | -10.753206 | 0.301930  | -0.238694 |
| H  | -11.523931 | 1.058924  | -0.067434 |
| H  | -11.173571 | -0.445366 | -0.917789 |
| H  | -10.567447 | -0.193723 | 0.717884  |
| H  | -9.734776  | 3.315984  | 0.522312  |

-----  
 Calculated energies and coordinates of [MeCN→Et<sub>3</sub>Si]<sup>+</sup> at PBE0-D4(CPCM=DCM)/def2-TZVP level of theory

|                         |     |                  |
|-------------------------|-----|------------------|
| Electronic energy       | ... | -659.40109109 Eh |
| Total Enthalpy          | ... | -659.13947027 Eh |
| Final Gibbs free energy | ... | -659.19731608 Eh |

CARTESIAN COORDINATES (ANGSTROEM)

|    |           |           |           |
|----|-----------|-----------|-----------|
| Si | 0.460150  | -0.004765 | -0.256712 |
| N  | -1.326818 | -0.011546 | 0.157921  |
| C  | -2.442228 | -0.001290 | 0.413515  |
| C  | -3.835502 | 0.009823  | 0.728861  |
| H  | -4.307075 | -0.869231 | 0.283155  |
| H  | -3.956399 | -0.012221 | 1.814355  |
| H  | -4.283987 | 0.919272  | 0.321982  |
| C  | 1.269931  | -0.002775 | 1.416255  |
| H  | 0.920556  | 0.872123  | 1.973742  |
| H  | 0.930178  | -0.882928 | 1.971409  |
| C  | 2.795756  | 0.005743  | 1.300513  |
| H  | 3.163003  | -0.873462 | 0.765121  |
| H  | 3.153344  | 0.890448  | 0.767659  |
| H  | 3.259872  | 0.006894  | 2.288959  |
| C  | 0.680698  | -1.562988 | -1.243136 |
| H  | 0.056185  | -1.484831 | -2.139636 |
| H  | 1.717988  | -1.551279 | -1.600171 |
| C  | 0.665964  | 1.558121  | -1.239213 |
| H  | 1.703180  | 1.556309  | -1.596714 |
| H  | 0.041710  | 1.476610  | -2.135582 |
| C  | 0.366834  | 2.846119  | -0.476553 |
| H  | 1.018872  | 2.956287  | 0.392896  |
| H  | 0.516337  | 3.720020  | -1.114222 |
| H  | -0.666258 | 2.872127  | -0.120854 |
| C  | 0.392369  | -2.855440 | -0.483781 |
| H  | 0.549110  | -3.726415 | -1.123720 |
| H  | 1.045363  | -2.962482 | 0.385348  |
| H  | -0.640438 | -2.890908 | -0.128084 |

-----  
 Calculated energies and coordinates of [MeCN→Et<sub>3</sub>Si]<sup>+</sup> at PBE0-D4(CPCM=acetonitrile)/def2-TZVP level of theory

|                         |     |                  |
|-------------------------|-----|------------------|
| Electronic energy       | ... | -659.40790905 Eh |
| Total Enthalpy          | ... | -659.14636791 Eh |
| Final Gibbs free energy | ... | -659.20410583 Eh |

CARTESIAN COORDINATES (ANGSTROEM)

|    |           |           |           |
|----|-----------|-----------|-----------|
| Si | 0.458256  | -0.005492 | -0.255322 |
| N  | -1.325307 | -0.013063 | 0.158303  |
| C  | -2.441073 | -0.001210 | 0.412641  |
| C  | -3.834217 | 0.011886  | 0.725905  |
| H  | -4.305439 | -0.867059 | 0.279545  |



H -3.955827 -0.009453 1.811347  
H -4.279983 0.922037 0.317524  
C 1.271738 -0.003308 1.415868  
H 0.922202 0.871373 1.973642  
H 0.932977 -0.883905 1.970969  
C 2.797297 0.006246 1.297604  
H 3.163720 -0.872591 0.760862  
H 3.152884 0.891277 0.763771  
H 3.263658 0.007522 2.285177  
C 0.681784 -1.563190 -1.241876  
H 0.057099 -1.484219 -2.138238  
H 1.719546 -1.551847 -1.597430  
C 0.665545 1.557354 -1.237539  
H 1.703122 1.556661 -1.593894  
H 0.040889 1.474853 -2.133585  
C 0.363551 2.844446 -0.474179  
H 1.015118 2.954767 0.395708  
H 0.511346 3.719301 -1.111217  
H -0.669702 2.867108 -0.118679  
C 0.391136 -2.855151 -0.482263  
H 0.546776 -3.726842 -1.121775  
H 1.043517 -2.962253 0.387424  
H -0.641918 -2.887914 -0.126980

-----  
Calculated energies and coordinates of Me<sub>3</sub>SiH at PBE0-D3/def2-TZVPP

Electronic energy ... -409.65093967 Eh  
Total Enthalpy ... -409.52383724 Eh  
Final Gibbs free energy ... -409.56248516 Eh

CARTESIAN COORDINATES (ANGSTROEM)

Si 0.000000 -0.000691 -0.369206  
H -0.000000 0.000800 -1.863390  
C 1.538522 -0.887019 0.228598  
H 1.559308 -1.922108 -0.118581  
H 2.443485 -0.394280 -0.132867  
H 1.577937 -0.899397 1.320733  
C -1.538521 -0.887019 0.228598  
H -1.577931 -0.899408 1.320733  
H -2.443485 -0.394274 -0.132857  
H -1.559312 -1.922105 -0.118591  
C -0.000001 1.773125 0.232764  
H 0.882553 2.310460 -0.120600  
H -0.882548 2.310462 -0.120610  
H -0.000007 1.811454 1.324998

-----  
Calculated energies and coordinates of Me<sub>3</sub>SiF at PBE0-D3/def2-TZVPP

Electronic energy -508.92439829 Eh  
Total Enthalpy -508.80180456 Eh  
Final Gibbs free energy -508.84275550 Eh

CARTESIAN COORDINATES (ANGSTROEM)

Si 0.000000 -0.000696 0.011616  
C -0.000000 1.773410 0.570554  
H 0.883505 2.301611 0.205969  
H -0.883510 2.301607 0.205976  
H 0.000004 1.834268 1.661777  
C 1.538663 -0.887273 0.566638  
H 1.597062 -0.911164 1.657753  
H 1.551666 -1.918631 0.208160  
H 2.436166 -0.388781 0.194594  
C -1.538663 -0.887271 0.566638  
H -2.436166 -0.388785 0.194586  
H -1.551663 -1.918633 0.208170  
H -1.597067 -0.911152 1.657753  
F 0.000002 0.001490 -1.601685

-----  
Calculated energies and coordinates of Me<sub>3</sub>Si<sup>+</sup> at PBE0-D3/def2-TZVPP

Electronic energy ... -408.77063889 Eh  
Total Enthalpy ... -408.65298264 Eh  
Final Gibbs free energy ... -408.69323035 Eh

CARTESIAN COORDINATES (ANGSTROEM)

Si 0.000200 0.000381 0.272820  
C 1.574957 -0.916094 0.281046  
H 1.439742 -1.996915 0.274653  
H 2.175624 -0.617559 -0.585751  
H 2.155888 -0.627777 1.165098  
C -1.580645 -0.905301 0.273412  
H -1.611589 -1.585573 1.132088  
H -2.449608 -0.249031 0.296212  
H -1.629843 -1.542176 -0.617923  
C 0.005615 1.821875 0.265349  
H 1.008367 2.246538 0.241903  
H -0.566142 2.184442 -0.596527  
H -0.523065 2.187182 1.153771

-----  
Calculated energies and coordinates of C<sub>6</sub>H<sub>5</sub>C(CH<sub>3</sub>)=CH<sub>2</sub> at PBE0-D4(CPCM=DCM)/def2-TZVP level of theory

Electronic energy ... -348.67930941 Eh  
Total Enthalpy ... -348.50860159 Eh  
Final Gibbs free energy ... -348.54980691 Eh

CARTESIAN COORDINATES (ANGSTROEM)

C 6.998511 16.657443 6.464318  
C 7.913759 16.576471 7.433194  
H 6.216591 17.407760 6.471157  
H 7.020327 15.974182 5.622694  
C 7.890974 17.488014 8.598196  
C 9.018971 15.566769 7.361350  
H 8.867195 14.890013 6.520245  
H 9.079810 14.978865 8.281646  
H 9.991156 16.051540 7.230792  
C 9.063480 17.794202 9.292346  
C 9.050895 18.669607 10.368739  
C 7.861547 19.247035 10.787087  
C 6.682861 18.935937 10.120359  
C 6.698257 18.065447 9.044164  
H 10.004231 17.355815 8.981934  
H 9.977320 18.898231 10.883924  
H 7.849545 19.926428 11.631853  
H 5.743009 19.365998 10.448538  
H 5.766502 17.813432 8.551203

-----  
Calculated energies and coordinates of PhC(H)(CH<sub>3</sub>)-CH<sub>2</sub>SiEt<sub>3</sub> at PBE0-D4(CPCM=DCM)/def2-TZVP level of theory

Electronic energy ... -876.20163736 Eh  
Total Enthalpy ... -875.80789303 Eh  
Final Gibbs free energy ... -875.87394682 Eh

CARTESIAN COORDINATES (ANGSTROEM)

C 0.578366 0.739710 0.902179  
C 1.001924 1.758990 -0.169543  
C 1.631291 -0.317752 1.149736  
C 0.084642 1.422733 2.166978  
Si 2.588710 2.794035 -0.072762  
H 1.074609 1.248644 -1.137927  
H 0.179895 2.476196 -0.291050  
C 2.047904 -1.128038 0.092161  
C 2.192218 -0.546150 2.402644  
H -0.323508 0.699242 2.876967  
H -0.707843 2.131387 1.917338  
H 0.877713 1.977183 2.671943  
C 2.367192 4.129177 -1.389758  
C 2.860697 3.642511 1.587905  
C 4.143949 1.822839 -0.536017  
C 2.992522 -2.123665 0.276013  
H 1.619812 -0.976626 -0.893591  
C 3.138005 -1.547179 2.594987  
H 1.893596 0.060799 3.248469

H 1.476301 4.718511 -1.144162  
 C 2.264657 3.600646 -2.818430  
 H 3.216923 4.818239 -1.306303  
 C 1.823262 4.700807 1.952759  
 H 3.857931 4.098556 1.547548  
 H 2.920104 2.878336 2.370816  
 H 4.792079 2.536443 -1.060999  
 H 3.869118 1.068464 -1.281752  
 C 4.921673 1.172803 0.603067  
 C 3.544052 -2.339486 1.533605  
 H 3.297796 -2.738225 -0.563938  
 H 3.559303 -1.702928 3.582245  
 H 1.400500 2.942095 -2.940853  
 H 3.151864 3.024885 -3.096363  
 H 2.161272 4.410677 -3.546513  
 H 1.815498 5.516065 1.224960  
 H 2.021054 5.141478 2.934314  
 H 0.813227 4.284180 1.980936  
 H 4.323776 0.419035 1.116737  
 H 5.227930 1.911892 1.348222  
 H 5.829632 0.681777 0.239894  
 H 4.282778 -3.119183 1.681248  
 H -0.284051 0.201365 0.485229

-----  
 Calculated energies and coordinates of B(C<sub>6</sub>F<sub>5</sub>)<sub>3</sub> at PBE0-D4(CPCM=benzene)/def2-TZVP level of theory

Electronic energy ... -2207.04435998 Eh  
 Total Enthalpy ... -2206.85835763 Eh  
 Final Gibbs free energy ... -2206.94390926 Eh

CARTESIAN COORDINATES (ANGSTROEM)

B 3.698587 5.581018 1.345145  
 F 3.303145 3.970409 -1.021796  
 F 2.191593 1.549785 -1.063226  
 F 1.285300 0.431290 1.222512  
 F 1.510706 1.754188 3.570224  
 F 2.658410 4.159766 3.645474  
 F 5.657996 7.191806 -0.043334  
 F 5.116893 8.877199 -2.044274  
 F 2.567081 9.234693 -2.862683  
 F 0.547786 7.882349 -1.673369  
 F 1.072886 6.156910 0.297870  
 F 5.648246 3.816855 2.566912  
 F 7.350463 4.517801 4.495754  
 F 7.329049 7.034709 5.472160  
 F 5.563490 8.851518 4.530614  
 F 3.865814 8.182259 2.583401  
 C 3.028394 4.174809 1.315184  
 C 2.865801 3.465051 0.127763  
 C 2.297726 2.206801 0.081214  
 C 1.838017 1.628065 1.252310  
 C 1.962361 2.305357 2.454489  
 C 2.562736 3.548824 2.468638  
 C 3.387186 6.601616 0.207206  
 C 4.388573 7.341088 -0.414005  
 C 4.133640 8.215770 -1.452420  
 C 2.827727 8.396295 -1.878373  
 C 1.796559 7.696303 -1.272832  
 C 2.092507 6.806126 -0.259090  
 C 4.681458 5.969395 2.488143  
 C 5.589748 5.061559 3.028805  
 C 6.486927 5.402907 4.021534  
 C 6.478883 6.693451 4.524508  
 C 5.579739 7.625303 4.031677  
 C 4.713373 7.256325 3.021367

-----  
 Calculated energies and coordinates of MeCN·B(C<sub>6</sub>F<sub>5</sub>)<sub>3</sub> at PBE0-D4(CPCM=benzene)/def2-TZVP level of theory

Electronic energy ... -2339.72502805 Eh  
 Total Enthalpy ... -2339.48685703 Eh  
 Final Gibbs free energy ... -2339.58041533 Eh

CARTESIAN COORDINATES (ANGSTROEM)

B 3.092101 5.834674 1.723721  
 N 1.882290 6.397605 2.558964  
 F 3.314507 4.210446 -0.798340  
 F 2.731055 1.647022 -1.030344  
 F 1.882808 0.217796 1.110638  
 F 1.629577 1.437419 3.523425  
 F 2.221437 4.014866 3.791249  
 F 5.423893 7.078766 0.300452  
 F 5.290098 8.522426 -1.907097  
 F 2.914888 8.949322 -3.141208  
 F 0.649986 7.870640 -2.102996  
 F 0.754306 6.404690 0.109553  
 F 5.351083 3.949983 2.371676  
 F 7.411323 4.501093 3.927466  
 F 7.675830 6.945923 5.064561  
 F 5.796179 8.850334 4.605578  
 F 3.714403 8.329652 3.037772  
 C 1.010496 6.816180 3.160322  
 C -0.089674 7.344249 3.915723  
 C 2.749907 4.259785 1.503416  
 C 2.877092 3.587602 0.297464  
 C 2.590886 2.239797 0.148951  
 C 2.160721 1.506059 1.237653  
 C 2.029744 2.131587 2.464177  
 C 2.329851 3.476083 2.569064  
 C 3.084156 6.710628 0.351989  
 C 4.214226 7.264039 -0.230538  
 C 4.176150 8.013486 -1.395309  
 C 2.968651 8.230441 -2.030843  
 C 1.816724 7.682711 -1.496781  
 C 1.900483 6.937682 -0.336040  
 C 4.395577 6.100085 2.662379  
 C 5.390103 5.167559 2.915838  
 C 6.489871 5.432855 3.716345  
 C 6.630733 6.678301 4.297219  
 C 5.669867 7.644818 4.062958  
 C 4.590989 7.339566 3.255669  
 H -0.369086 6.630090 4.692483  
 H -0.936271 7.512118 3.247261  
 H 0.209941 8.288722 4.373934
